# Supplementary material for: Self-reported eating rate and metabolic syndrome in Japanese people: cross-sectional study
Source: PubMed Central journal article supplement (PMC4158192; doi:10.1136/bmjopen-2014-005241), 2014-09-05
Supplement: bmjopen-2014-005241.draft_revisions.pdf [file bmjopen-2014-005241.draft_revisions.pdf]

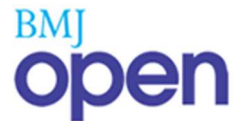

## Eating rate and prevalence of metabolic syndrome in Japanese

|                                 |                                                                                                                                                                                                                                                                                                                                                                                                                                                                                                                                                                                                                                                                                                                                                                                                                                                                                                                                                                                                                         |
|---------------------------------|-------------------------------------------------------------------------------------------------------------------------------------------------------------------------------------------------------------------------------------------------------------------------------------------------------------------------------------------------------------------------------------------------------------------------------------------------------------------------------------------------------------------------------------------------------------------------------------------------------------------------------------------------------------------------------------------------------------------------------------------------------------------------------------------------------------------------------------------------------------------------------------------------------------------------------------------------------------------------------------------------------------------------|
| Journal:                        | <i>BMJ Open</i>                                                                                                                                                                                                                                                                                                                                                                                                                                                                                                                                                                                                                                                                                                                                                                                                                                                                                                                                                                                                         |
| Manuscript ID:                  | bmjopen-2014-005241                                                                                                                                                                                                                                                                                                                                                                                                                                                                                                                                                                                                                                                                                                                                                                                                                                                                                                                                                                                                     |
| Article Type:                   | Research                                                                                                                                                                                                                                                                                                                                                                                                                                                                                                                                                                                                                                                                                                                                                                                                                                                                                                                                                                                                                |
| Date Submitted by the Author:   | 11-Mar-2014                                                                                                                                                                                                                                                                                                                                                                                                                                                                                                                                                                                                                                                                                                                                                                                                                                                                                                                                                                                                             |
| Complete List of Authors:       | Nagahama, Satsue; All Japan Labor Welfare Foundation, ; School of Medicine, Toho University, Department of Environmental and Occupational Health<br>Kurotani, Kayo; National Center for Global Health and Medicine, Department of Epidemiology and Prevention, Center for Clinical Sciences<br>Pham, Ngoc Minh; Thai Nguyen University of Medicine and Pharmacy, Department of Epidemiology, Faculty of Public Health<br>Nanri, Akiko; National Center for Global Health and Medicine, Department of Epidemiology and Prevention, Center for Clinical Sciences<br>Kuwahara, Keisuke; National Center for Global Health and Medicine, Department of Epidemiology and Prevention, Center for Clinical Sciences<br>Dan, Masashi; All Japan Labor Welfare Foundation, Nishiwaki, Yuji; School of Medicine, Toho University, Department of Environmental and Occupational Health<br>Mizoue, Tetsuya; National Center for Global Health and Medicine, Department of Epidemiology and Prevention, Center for Clinical Sciences |
| <b>Primary Subject Heading</b>: | Epidemiology                                                                                                                                                                                                                                                                                                                                                                                                                                                                                                                                                                                                                                                                                                                                                                                                                                                                                                                                                                                                            |
| Secondary Subject Heading:      | Epidemiology                                                                                                                                                                                                                                                                                                                                                                                                                                                                                                                                                                                                                                                                                                                                                                                                                                                                                                                                                                                                            |
| Keywords:                       | EPIDEMIOLOGY, PREVENTIVE MEDICINE, PUBLIC HEALTH                                                                                                                                                                                                                                                                                                                                                                                                                                                                                                                                                                                                                                                                                                                                                                                                                                                                                                                                                                        |
|                                 |                                                                                                                                                                                                                                                                                                                                                                                                                                                                                                                                                                                                                                                                                                                                                                                                                                                                                                                                                                                                                         |

SCHOLARONE™  
Manuscripts

1  
2  
3  
4  
5  
6 **1 Eating rate and prevalence of metabolic syndrome in Japanese**  
7  
8

9  
10  
11  
12  
13  
14  
15  
16  
17  
18  
19  
20  
21  
22  
23  
24  
25  
26  
27  
28  
29  
30  
31  
32  
33  
34  
35  
36  
37  
38  
39  
40  
41  
42  
43  
44  
45  
46  
47  
48  
49  
50  
51  
52  
53  
54  
55  
56  
57  
58  
59  
60

2  
3 Satsue Nagahama<sup>1 2 3\*</sup>, Kayo Kurotani<sup>1</sup>, Ngoc Minh Pham<sup>4</sup>, Akiko Nanri<sup>1</sup>, Keisuke  
4 Kuwahara<sup>1</sup>, Masashi Dan<sup>2</sup>, Yuji Nishiwaki<sup>3</sup>, Tetsuya Mizoue<sup>1</sup>

5  
6 <sup>1</sup> Department of Epidemiology and Prevention, Center for Clinical Sciences, National  
7 Center for Global Health and Medicine, 1-21-1, Toyama, Shinjuku-ku, Tokyo, Japan,  
8 Zip162-8655; Tel +81-3-3202-7181, Fax 81-3-3202-7364, E-mail: [satsue-n@umin.ac.jp](mailto:satsue-n@umin.ac.jp)

9 <sup>2</sup> All Japan Labor Welfare Foundation, Tokyo, Japan;

10 <sup>3</sup> Department of Environmental and Occupational Health, School of Medicine, Toho  
11 University, Tokyo, Japan;

12 <sup>4</sup> Department of Epidemiology, Faculty of Public Health, Thai Nguyen University of  
13 Medicine and Pharmacy, Thai Nguyen Province, Vietnam;

14  
15 Keywords: eating rate, eating speed, metabolic syndrome, health check, Japan

16 Word count: 2354

1  
2  
3  
4  
5  
6  
7  
8  
9  
10  
11  
12  
13  
14  
15  
16  
17  
18  
19  
20  
21  
22  
23  
24  
25  
26  
27  
28  
29  
30  
31  
32  
33  
34  
35  
36  
37  
38  
39  
40  
41  
42  
43  
44  
45  
46  
47  
48  
49  
50  
51  
52  
53  
54  
55  
56  
57  
58  
59  
60

17 **ABSTRACT**

18 **Objectives:** To examine the association between eating rate and the prevalence of  
19 metabolic syndrome.

20 **Design:** Cross-sectional study.

21 **Setting:** Annual health checkup for workers at a health check service center in Japan.

22 **Participants:** A total of 56,865 participants (41,820 males and 15,045 females) who  
23 attended health checkup in 2011 and reported not to have a history of coronary heart  
24 disease or stroke.

25 **Main outcome measure:** Metabolic syndrome was defined according to two criteria:  
26 the Adult Treatment Program III of the National Cholesterol Education Program  
27 (NCEP-ATPIII) and International Diabetes Federation (IDF).

28 **Results:** In multiple logistic regression models, eating rate was significantly and  
29 positively associated with metabolic syndrome defined by both criteria. The odds ratio  
30 (95% confidence interval) for slow, normal and fast were 0.70 (0.62 to 0.79), 1.00  
31 (reference) and 1.61 (1.53 to 1.70), respectively in men (P for trend <0.001), and 0.74  
32 (0.60 to 0.91), 1.00 (reference) and 1.27 (1.13 to 1.43), respectively, in women (P for  
33 trend <0.001) under NCEP-ATPIII criteria. The association of eating rate and metabolic  
34 syndrome was attenuated after further adjustment for body mass index, but remained

1  
2  
3  
4  
5  
6 35 statistically significant only in men. Of components of metabolic syndrome, the  
7  
8  
9 36 strongest association with eating rate was abdominal obesity. The associations of slow  
10  
11  
12 37 eating with high blood pressure and hyperglycemia and those of fast eating with  
13  
14  
15 38 abnormal lipid profile were still significant in men, even after adjustment for body mass  
16  
17  
18 39 index.

19  
20  
21 40 **Conclusions:** Our results suggest that eating rate is associated with higher prevalence of  
22  
23  
24 41 metabolic syndrome and that this association is largely accounted for by higher body  
25  
26  
27 42 mass.

1  
2  
3  
4  
5  
6 43 **Strength and Limitation**  
7

8  
9 44 This large scale study was the first study to elucidate the association between eating rate  
10  
11  
12 45 and metabolic syndrome in men and women, separately.  
13

14  
15 46 This is the only study to report the association between eating rate and metabolic  
16  
17  
18 47 syndrome defined by using waist circumference.  
19

20  
21 48 Eating rate was assessed by self-report questionnaire.  
22  
23  
24  
25  
26  
27  
28  
29  
30  
31  
32  
33  
34  
35  
36  
37  
38  
39  
40  
41  
42  
43  
44  
45  
46  
47  
48  
49  
50  
51  
52  
53  
54  
55  
56  
57  
58  
59  
60

## 49 Introduction

50 Metabolic syndrome (MetS) is a cluster of physiological risk factors associated  
51 with cardiovascular disease and several types of cancer.<sup>1</sup> Determination of etiologic  
52 factors for MetS is required for the establishment of public health strategies to reduce its  
53 prevalence and prevent resulting complications. Growing evidence from both  
54 observational and interventional studies in human suggests a role of dietary habits in the  
55 development of MetS,<sup>2-4</sup> which originates from obesity. Obesity has been extensively  
56 investigated in relation to dietary habits including eating rate since 1962, when Ferster  
57 published a theoretical and practical weight control program focusing on eating  
58 behaviors including eating rate.<sup>5</sup> Observational studies showed that obese people ate at a  
59 faster rate than non-obese people,<sup>6</sup> and reducing eating rate may be a simple and  
60 effective therapy for obesity.<sup>7</sup>

61 During the past decade, several cross-sectional studies have found a positive  
62 association between eating rate and overweight<sup>8-11</sup> or insulin resistance.<sup>11-15</sup> Similarly, a  
63 few longitudinal studies showed that eating fast was associated with an increased risk of  
64 weight gain<sup>16, 17</sup> and type 2 diabetes.<sup>18</sup> In addition, some cross-sectional studies have  
65 reported that fast eating was positively associated with hypertriglyceridemia and low  
66 high-density lipoprotein cholesterol (HDL-C).<sup>11, 14, 19</sup> Therefore it is conceivable that

1  
2  
3  
4  
5  
6 67 eating rate may be associated with the prevalence of MetS. To our knowledge, however,  
7  
8  
9 68 only one Korean study cross-sectionally examined eating rate in relation to MetS.<sup>20</sup> In  
10  
11  
12 69 that study, MetS was defined by using body mass index (BMI), rather than waist  
13  
14  
15 70 circumference, and investigated the association in men only. Waist circumference is a  
16  
17  
18 71 component of most MetS definitions<sup>21, 22</sup> as a surrogate of central obesity, which can  
19  
20  
21 72 better predict cardiovascular risk.<sup>23</sup> It is therefore necessary to examine the relationship  
22  
23  
24 73 between eating rate and MetS using waist circumference in both sexes. Here, we  
25  
26  
27 74 investigated cross-sectionally the association between eating rate and the prevalence of  
28  
29  
30 75 MetS according to two criteria: the National Cholesterol Education Program, Adult  
31  
32  
33 76 Treatment Panel III (NCEP-ATPIII) criteria<sup>21</sup> and International Diabetes Federation  
34  
35  
36 77 (IDF) criteria<sup>22</sup> using a large dataset of worker health checkup in Japanese men and  
37  
38  
39 78 women.  
40  
41  
42 79

## 43 44 80 **METHODS AND PROCEDURES**

### 45 46 47 81 **Study population**

48  
49 82 Study participants were attendants of 2011 (calendar year) annual health  
50  
51  
52 83 examination at All Japan Labor Welfare Foundation (Tokyo), a health service center  
53  
54  
55 84 performing health checkup for employees. Participants were employees and their  
56  
57  
58  
59  
60

1  
2  
3  
4  
5  
6 85 dependents, aged 17-99 in men and 17-85 in women. Of 297,148 participants, we  
7  
8  
9 86 excluded 3,660 with a history of myocardial infarction, coronary heart disease or stroke,  
10  
11  
12 87 24,452 with missing information on eating rate, 192,581 who took meal within 8 hours  
13  
14  
15 88 or provided no information on meal time, 204,423 with missing data for any of the  
16  
17  
18 89 components of MetS, 15,886 with missing information on covariates (BMI, smoking  
19  
20  
21 90 status, alcohol consumption and physical activity). Some participants met more than one  
22  
23  
24 91 of these exclusion criteria, leaving 56,865 participants (41,820 males and 15,045  
25  
26  
27 92 females) for analysis.

#### 93 94 **Data collection and measurements**

95 In Japan, a new health checkup program focusing on MetS was initiated in  
96 2008 according to the recommendation from the Ministry of Health, Labor and  
97 Welfare.<sup>24</sup> At All Japan Labor Welfare Foundation, a self-administered questionnaire,  
98 which was recommended by the Japanese government (Ministry of Health, Labor and  
99 Welfare),<sup>25</sup> was used to assess eating rate, medical history and health-related lifestyles  
100 including smoking, alcohol consumption and regular physical activity. Eating rate was  
101 assessed by asking “How fast is your speed of eating?”, with three response options  
102 (slow, normal and fast). A trained staff measured height to the nearest 0.1 cm, weight to



1  
2  
3  
4  
5  
6 103 the nearest 0.1 kg and waist circumference to the nearest 0.1 cm at the umbilical level in  
7  
8  
9 104 a standing position. BMI was calculated as the weight in kilograms divided by the  
10  
11  
12 105 squared height in meters. Blood pressure in the sitting position was measured using an  
13  
14  
15 106 automated machine (HEM-907, Omron, Kyoto, Japan). Participants with high blood  
16  
17  
18 107 pressure ( $\geq 130$  mm Hg systolic or  $\geq 85$  mm Hg diastolic) received another measurement  
19  
20  
21 108 and data showing lower systolic blood pressure was used. Venous blood sample was  
22  
23  
24 109 collected, stored in a cooler at 4 degrees for transportation to an external laboratory  
25  
26  
27 110 (SRL, Tokyo, Japan) and measured within 24 hours of blood drawing. Triglyceride level  
28  
29  
30 111 was measured by enzymatic colorimetric test (Bio Majesty JCA-BM8060, JEOL, Tokyo,  
31  
32  
33 112 Japan). HDL-C level was determined by a direct method (Bio Majesty JCA-BM8060,  
34  
35  
36 113 JEOL, Tokyo, Japan). Plasma glucose levels were determined using by the hexokinase  
37  
38  
39 114 method (an automatic clinical chemistry analyzer JCA-BM9000 series, JEOL, Tokyo,  
40  
41  
42 115 Japan).

43  
44 116

#### 45 46 117 **Definitions for MetS**

47  
48  
49 118 MetS was defined according to two criteria: NCEP-ATPIII criteria and IDF  
50  
51  
52 119 criteria. Under NCEP-ATPIII criteria, MetS was defined as the presence of three or  
53  
54  
55 120 more of the following risk factors: 1) waist circumference for Asian population  $\geq 90$  cm  
56  
57  
58  
59  
60

1  
2  
3  
4  
5  
6 121 in men and  $\geq 80$  cm in women, 2) triglyceride level  $\geq 150$  mg/dL (1.7 mmol/L), 3)  
7  
8  
9 122 HDL-C level  $< 40$  mg/dL (1.04 mmol/L) in men and  $< 50$  mg/dL (1.3 mmol/L) in women,  
10  
11  
12 123 4) blood pressure  $\geq 130$  mm Hg systolic or  $\geq 85$  mm Hg diastolic, 5) fasting glucose level  
13  
14  
15 124  $\geq 100$  mg/dL (5.6 mmol/L).<sup>21</sup> To meet the criteria for IDF MetS, participants must have  
16  
17  
18 125 central obesity (waist circumference  $\geq 90$  cm in men and  $\geq 80$  cm in women) plus any  
19  
20  
21 126 two of the following factors: 1) HDL-C level  $< 40$  mg/dL (1.04 mmol/L) in men and  $< 50$   
22  
23 127 mg/dL (1.29 mmol/L) in women, 2) triglyceride level  $\geq 150$  mg/dL (1.7 mmol/L), 3)  
24  
25  
26 128 blood pressure  $\geq 130$  mm Hg systolic or  $\geq 85$  mm Hg diastolic, 4) fasting glucose level  
27  
28  
29 129  $\geq 100$  mg/dL (5.6 mmol/L).<sup>22</sup> In both criteria, participants under medication for diabetes,  
30  
31  
32 130 hypertension and dyslipidemia were considered as having respective factor, irrespective  
33  
34  
35 131 of measured data.  
36  
37  
38  
39  
40  
41 133 **Statistical analysis**

42  
43  
44 134 Participants were divided into three groups according to eating rate (slow,  
45  
46  
47 135 normal and fast). The characteristics of participants across eating rate categories were  
48  
49  
50 136 expressed as means (standard deviation), medians (interquartile range) and percentages  
51  
52  
53 137 for normal continuous variables, non-normal continuous variables and categorical  
54  
55  
56 138 variables, respectively. Trend association was assessed by assigning ordinal numbers (0  
57  
58  
59  
60

1  
2  
3  
4  
5  
6 139 to 2) to the categories of eating rate (slow, normal and fast, respectively) and was tested  
7  
8  
9 140 using linear regression and an extension of the Wilcoxon Rank-Sum test for normal and  
10  
11  
12 141 non-normal continuous variables, respectively, and logistic regression for categorical  
13  
14  
15 142 variables. Multiple logistic regression analysis was used to estimate the odds ratios  
16  
17  
18 143 (OR) and 95% confidence interval (CI) for the prevalence of MetS across eating rate  
19  
20  
21 144 categories, with normal eating rate as the reference. In multiple regression analysis, the  
22  
23  
24 145 initial model was adjusted for age (continuous, year) only. In the second model, we  
25  
26  
27 146 further adjusted for smoking status (non-smoker, daily smoker consuming <20  
28  
29 147 cigarettes per day or  $\geq 20$  cigarettes per day), alcohol consumption (non-drinker, <1 *go*,  
30  
31  
32 148 1 to <2 *go* or  $\geq 2$  *go* per day; *go* is a Japanese traditional unit of measurement for alcohol  
33  
34  
35 149 and a *go* of sake (Japanese traditional beverage) contains ~23g of ethanol) and physical  
36  
37  
38 150 activity (walking time <60 min per day or  $\geq 60$  min per day). In the third model, we  
39  
40  
41 151 added BMI (continuous,  $\text{kg/m}^2$ ) to the second model. We performed likelihood ratio test  
42  
43  
44 152 for testing the interaction between eating rate and sex. All analyses were done for men  
45  
46  
47 153 and women separately because the interaction was significant (P for interaction <0.001).  
48  
49  
50 154 We repeated the above analyses for each component of MetS. Two-tailed P value <0.05  
51  
52  
53 155 was considered statistically significant. All statistical analyses were performed with  
54  
55  
56 156 STATA, version 12.1 (StataCorp, College Station, TX, USA).

1  
2  
3  
4  
5  
6 157  
7  
89 158 **RESULTS**

10  
11  
12 159 The prevalence of MetS defined by NCEP-ATPIII and IDF was 18.5% and  
13  
14 160 12.8%, respectively, in men and 12.9% and 11.4%, respectively, in women. **Table 1**  
15  
16  
17 161 shows characteristics of the study participants across categories of eating rate. Men who  
18  
19  
20 162 ate fast tended to be young, whereas women who ate slowly tended to be young. Those  
21  
22  
23 163 who ate fast had significantly higher BMI, waist circumference, triglyceride level and  
24  
25  
26 164 systolic and diastolic blood pressures and lower HDL-C level in both men and women.  
27  
28

29 165 The ORs of the prevalence of MetS across eating rate are shown in **Table 2**.  
30  
31  
32 166 Regardless of which criteria we used, faster eating was associated with higher  
33  
34  
35 167 prevalence of MetS in age- and multivariable-adjusted models. The trend was more  
36  
37  
38 168 apparent in men than in women under IDF criteria. The multivariable-adjusted ORs  
39  
40  
41 169 (95% CI) of MetS for eating slow, normal and fast rate were 0.70 (0.62 to 0.79), 1.00  
42  
43  
44 170 (reference) and 1.61 (1.53 to 1.70), respectively, in men (P for trend <0.001), and 0.74  
45  
46  
47 171 (0.60 to 0.91), 1.00 (reference) and 1.27 (1.13 to 1.43), respectively, in women (P for  
48  
49  
50 172 trend <0.001) under NCEP-ATPIII criteria; the correspondent values were 0.62 (0.54 to  
51  
52  
53 173 0.72), 1.00 (reference) and 1.82 (1.72 to 1.94), respectively, in men (P for trend <0.001),  
54  
55  
56 174 and 0.73 (0.58 to 0.91), 1.00 (reference) and 1.32 (1.17 to 1.49), respectively, in women  
57  
58  
59  
60

1  
2  
3  
4  
5  
6 175 (P for trend <0.001) under IDF criteria. Further adjustment for BMI markedly  
7  
8  
9 176 attenuated these associations; however, the association with eating rate and MetS under  
10  
11  
12 177 both criteria remained statistically significant in men.  
13

14  
15 **Table 3** shows the ORs of the prevalence of individual MetS components  
16  
17  
18 179 across three categories of eating rate. The prevalence of central obesity increased from  
19  
20  
21 180 slow to fast eating in both men and women (OR 0.63, 1.00 (reference) and 1.97,  
22  
23  
24 181 respectively, in men (P for trend <0.001), and 0.73, 1.00(reference) and 1.44,  
25  
26  
27 182 respectively, in women (P for trend <0.001)). High blood pressure was positively  
28  
29  
30 183 associated with eating rate in both sexes. Eating rate was associated with fasting glucose,  
31  
32  
33 184 triglyceride and HDL-C in men and with HDL-C in women. Additional adjustment for  
34  
35  
36 185 BMI largely attenuated these associations, but the associations of slow eating with high  
37  
38  
39 186 blood pressure (men and women) and hyperglycemia (men) and those of fast eating  
40  
41  
42 187 with abnormal lipid profile (men) remained statistically significant.  
43

44 188

## 45 46 47 189 **DISCUSSION**

48  
49  
50 190 In this large population of Japanese men and women, we found that eating rate  
51  
52  
53 191 was positively associated with the prevalence of MetS, especially in men. Of  
54  
55  
56 192 components of MetS, the association with abdominal obesity was strongest. The  
57  
58  
59  
60

1  
2  
3  
4  
5  
6 193 relationship with blood pressure in both sexes and fasting plasma glucose and lipids in  
7  
8  
9 194 men remained statistically significant even after additional adjustment for BMI. To our  
10  
11  
12 195 best knowledge, the present study is the first to report a positive association between  
13  
14  
15 196 eating rate and the prevalence of MetS defined by using waist circumference.

17  
18 197 The present finding for Mets is consistent with that of a study among Korean  
19  
20  
21 198 men reporting that eating rate was positively associated with MetS, which was defined  
22  
23  
24 199 by using BMI instead of waist circumference.<sup>20</sup> As regards MetS components, our study  
25  
26  
27 200 is compatible with some cross-sectional studies showing that eating rate was associated  
28  
29  
30 201 with higher BMI<sup>8-10</sup> and two longitudinal studies showing that eating rate was  
31  
32  
33 202 associated with weight gain.<sup>16, 17</sup> In a Korean study that elucidated the association  
34  
35  
36 203 between eating rate and components of MetS for men and women separately, eating rate  
37  
38  
39 204 was associated with obesity, high blood pressure, hyperglycemia and abnormal lipid  
40  
41  
42 205 profile in men, whereas it was associated with only obesity in women.<sup>11</sup> Our results  
43  
44  
45 206 were largely consistent with those in the Korean study (except for blood pressure in  
46  
47  
48 207 women).

49  
50 208 We found that the association between eating rate and MetS was stronger in  
51  
52  
53 209 men than in women. In the present study, the association between eating rate and MetS  
54  
55  
56 210 components (hyperglycemia with slow eating and dyslipidemia with fast eating)

1  
2  
3  
4  
5  
6 211 remained statistically significant even after adjusting for BMI in men but not in women.  
7  
8  
9 212 This finding appears to be compatible with those in previous studies showing sex  
10  
11  
12 213 difference in association of eating rate with MetS components<sup>11</sup> and insulin resistance.<sup>12</sup>  
13  
14  
15 214 These results may reflect the difference in actual eating speed between men and women.  
16  
17  
18 215 One study elucidated that women took more bites, smaller bite size and slower bites  
19  
20  
21 216 than men in eating the same amount of doughnut, irrespectively of body size.<sup>26</sup> Another  
22  
23  
24 217 study showed that objectively measured eating speed in men with self-reported slow  
25  
26  
27 218 eating was faster than that in women with self-reported fast eating.<sup>27</sup> Taken together,  
28  
29  
30 219 eating rate may have a greater impact on metabolism in men than that in women.

31  
32 220 Although mechanisms whereby eating rate influences metabolism is not fully  
33  
34  
35 221 elucidated, overeating may link fast eating to MetS. Fast eating gives few satiety signal  
36  
37  
38 222 from oral cavity to the brain,<sup>28, 29</sup> induces less satiation and satiety due to a lack of  
39  
40  
41 223 stomach expansion<sup>30</sup> and alters the circulating levels of certain gut hormones.<sup>31, 32</sup> In  
42  
43  
44 224 these pathways, fast eating leads to excess energy intake,<sup>33, 34</sup> resulting in overweight  
45  
46  
47 225 and MetS. Because fast eating has been associated with obesity even after adjusting for  
48  
49  
50 226 total energy intake,<sup>8-11, 14</sup> there may be other pathways. One study showed that  
51  
52  
53 227 interleukin-1 $\beta$  and interleukin-6 were higher among those who ate fast than among  
54  
55  
56 228 those who ate slowly, even after accounting for energy intake and BMI.<sup>35</sup> The authors

1  
2  
3  
4  
5  
6 229 ascribed the elevation of these inflammatory cytokines to an increased postprandial  
7  
8  
9 230 hyperglycemia after eating fast. These cytokines were well-known to give rise to obesity,  
10  
11 231 dyslipidemia and insulin resistance,<sup>36-39</sup> and thus also accounted for the association  
12  
13  
14 232 between fast eating and MetS.  
15  
16

17  
18 233 The strengths of our study deserve mention. Data of this large-scale study was  
19  
20 234 derived from annual health-checkup for employees of various companies. Therefore, the  
21  
22 235 present findings may be applicable to apparently healthy workers in Japan. In addition,  
23  
24 236 body weight, body height and waist circumference was measured by trained technicians,  
25  
26 237 which increased the validity of our study. Nonetheless, several limitations in the present  
27  
28 238 study merit consideration. First, eating rate was self-reported. However, self-reported  
29  
30 239 eating rate has been shown to be well correlated with friend-reported one<sup>9</sup> or objectively  
31  
32 240 measured one.<sup>27</sup> Second, total energy intake was not available in our study. However,  
33  
34 241 because energy intake is influenced by eating rate and thus may act as a mediator rather  
35  
36 242 than confounder, the adjustment of energy intake could underestimate the association  
37  
38 243 between eating rate and MetS. Moreover, eating rate has been associated with body  
39  
40 244 weight independent of energy intake.<sup>7-10, 13</sup> Third, cross-sectional design precludes any  
41  
42 245 causal inferences about the role of eating rate. Finally, we cannot exclude a possibility  
43  
44 246 of the effects of residual confounding and confounding by unmeasured variables.  
45  
46  
47  
48  
49  
50  
51  
52  
53  
54  
55  
56  
57  
58  
59  
60



1  
2  
3  
4  
5  
6 247 In conclusion, we found a positive trend association between eating rate and  
7  
8  
9 248 the prevalence of MetS, especially in men. The association between eating rate and  
10  
11  
12 249 MetS was largely accounted for by level of obesity, only eating rate per se may have  
13  
14  
15 250 small effect, in any, on the components of MetS. Further research should address  
16  
17  
18 251 whether reducing eating rate prevents obesity and MetS.  
19  
20  
21  
22  
23  
24  
25  
26  
27  
28  
29  
30  
31  
32  
33  
34  
35  
36  
37  
38  
39  
40  
41  
42  
43  
44  
45  
46  
47  
48  
49  
50  
51  
52  
53  
54  
55  
56  
57  
58  
59  
60

Table 1. Characteristics of the study individuals according to eating rates

|                                     | Men (n = 41,820) |               |               | P for trend <sup>a</sup> | Women (n = 15,045) |              |              | P for trend <sup>a</sup> |
|-------------------------------------|------------------|---------------|---------------|--------------------------|--------------------|--------------|--------------|--------------------------|
|                                     | Slow             | Normal        | Fast          |                          | Slow               | Normal       | Fast         |                          |
| n (%)                               | 2,821 (6.8)      | 24,893 (59.5) | 14,106 (33.7) |                          | 1,398 (9.3)        | 9,893 (65.8) | 3,754 (24.9) |                          |
| Age (years) <sup>b</sup>            | 46.9 ± 12.3      | 46.9 ± 10.9   | 45.0 ± 10.4   | <0.001                   | 43.5 ± 12.5        | 47.2 ± 11.6  | 46.7 ± 11.2  | <0.001                   |
| Walking time, ≥60 min/day (%)       | 21.8             | 19.0          | 20.6          | 0.004                    | 15.5               | 15.0         | 16.1         | 0.798                    |
| Smoking status (%)                  |                  |               |               |                          |                    |              |              |                          |
| Non-smoker                          | 61.9             | 55.0          | 56.6          | <0.001                   | 82.9               | 83.1         | 80.7         | 0.572                    |
| Daily consuming <20 cigarettes /day | 28.6             | 34.6          | 31.3          |                          | 16.0               | 15.7         | 17.6         |                          |
| Daily consuming ≥20 cigarettes /day | 9.5              | 10.4          | 12.1          |                          | 1.1                | 1.2          | 1.7          |                          |

## Alcohol (%)

|                                               |                  |                  |                  |        |                  |                  |                  |        |
|-----------------------------------------------|------------------|------------------|------------------|--------|------------------|------------------|------------------|--------|
| Non-drinker                                   | 30.2             | 26.7             | 26.7             | <0.001 | 53.4             | 52.2             | 49.8             | <0.001 |
| Drinker <1 <i>go</i> /day <sup>d</sup>        | 33.9             | 35.7             | 34.5             |        | 34.2             | 35.9             | 35.5             |        |
| Drinker 1 to <2 <i>go</i> /day <sup>d</sup>   | 24.6             | 26.3             | 26.8             |        | 9.5              | 9.5              | 11.5             |        |
| Drinker $\geq 2$ <i>go</i> /day <sup>d</sup>  | 11.3             | 11.3             | 12.0             |        | 2.9              | 2.4              | 3.2              |        |
| BMI (kg/m <sup>2</sup> ) <sup>b</sup>         | 22.4 $\pm$ 3.3   | 23.4 $\pm$ 3.3   | 24.6 $\pm$ 3.7   | <0.001 | 21.0 $\pm$ 3.5   | 21.8 $\pm$ 3.5   | 22.5 $\pm$ 3.8   | <0.001 |
| Waist circumference (cm) <sup>b</sup>         | 80.3 $\pm$ 9.2   | 82.9 $\pm$ 9.0   | 86.0 $\pm$ 9.8   | <0.001 | 75.5 $\pm$ 9.5   | 77.7 $\pm$ 9.4   | 79.6 $\pm$ 9.8   | <0.001 |
| Systolic blood pressure (mm Hg) <sup>b</sup>  | 123.5 $\pm$ 15.5 | 126.1 $\pm$ 15.5 | 126.7 $\pm$ 15.1 | <0.001 | 113.1 $\pm$ 16.3 | 117.3 $\pm$ 17.2 | 117.0 $\pm$ 17.2 | <0.001 |
| Diastolic blood pressure (mm Hg) <sup>b</sup> | 75.2 $\pm$ 11.4  | 77.3 $\pm$ 11.9  | 78.0 $\pm$ 12.0  | <0.001 | 69.1 $\pm$ 10.9  | 71.4 $\pm$ 11.5  | 71.5 $\pm$ 11.9  | <0.001 |
| Fasting plasma glucose (mg/dL) <sup>c</sup>   | 91 (85 to 98)    | 92 (86 to 99)    | 92 (86 to 99)    | 0.001  | 87 (82 to 93)    | 88 (83 to 94)    | 88 (83 to 94)    | 0.001  |
| Triglyceride (mg/dL) <sup>c</sup>             | 92 (65 to 138)   | 99 (69 to 148)   | 107 (73 to 161)  | <0.001 | 63 (48 to 87)    | 69 (51 to 96)    | 71 (52 to 101)   | <0.001 |

1  
2  
3  
4  
5  
6  
7  
8  
9  
10  
11  
12  
13  
14  
15  
16  
17  
18  
19  
20  
21  
22  
23  
24  
25  
26  
27  
28  
29  
30  
31  
32  
33  
34  
35  
36  
37  
38  
39  
40  
41  
42  
43  
44  
45  
46  
47  
48  
49

|                            |             |             |             |        |             |             |             |        |
|----------------------------|-------------|-------------|-------------|--------|-------------|-------------|-------------|--------|
| HDL-C (mg/dL) <sup>b</sup> | 61.3 ± 15.3 | 59.4 ± 15.0 | 57.2 ± 14.3 | <0.001 | 71.4 ± 15.3 | 70.5 ± 15.8 | 69.3 ± 15.5 | <0.001 |
|----------------------------|-------------|-------------|-------------|--------|-------------|-------------|-------------|--------|

Cross to sectional survey of 56,865 examinees in All Japan Labor Welfare Foundation, Japan, 2011.

BMI=body mass index; HDL-C=high to density lipoprotein cholesterol.

<sup>a</sup> Linear regression and an extension of the Wilcoxon Rank-Sum test for normal and non-normal continuous variables, respectively, and logistic regression for categorical variables, assigning ordinal number (0 to 2) to eating rate.

<sup>b</sup> Mean ± SD.

<sup>c</sup> Median (interquartile range).

<sup>d</sup> One go contains ~23g of ethanol.

Table 2. Odds ratios and 95% confidence intervals for metabolic syndrome according to eating rate (n = 56,865)

| Eating rate          | Men (n = 41,820)   |               |                    | P for trend <sup>a</sup> | Women (n = 15,045) |              |                    | P for trend <sup>a</sup> |
|----------------------|--------------------|---------------|--------------------|--------------------------|--------------------|--------------|--------------------|--------------------------|
|                      | Slow               | Normal        | Fast               |                          | Slow               | Normal       | Fast               |                          |
| n (%)                | 2,821 (6.8)        | 24,893 (59.5) | 14,106 (33.7)      |                          | 1,398 (9.3)        | 9,893 (65.8) | 3,754 (25.0)       |                          |
| NCEP-ATPIII          |                    |               |                    |                          |                    |              |                    |                          |
| MetS, n              | 361                | 4,180         | 3,193              |                          | 116                | 1,261        | 547                |                          |
| Model 1 <sup>b</sup> | 0.70(0.62 to 0.79) | 1.00 (Ref)    | 1.62(1.53 to 1.71) | <0.001                   | 0.75(0.61 to 0.92) | 1.00 (Ref)   | 1.27(1.13 to 1.42) | <0.001                   |
| Model 2 <sup>c</sup> | 0.70(0.62 to 0.79) | 1.00 (Ref)    | 1.61(1.53 to 1.70) | <0.001                   | 0.74(0.60 to 0.91) | 1.00 (Ref)   | 1.27(1.13 to 1.43) | <0.001                   |
| Model 3 <sup>d</sup> | 0.91(0.80 to 1.04) | 1.00 (Ref)    | 1.10(1.03 to 1.17) | <0.001                   | 0.88(0.70 to 1.11) | 1.00 (Ref)   | 0.98(0.86 to 1.12) | 0.714                    |
| IDF                  |                    |               |                    |                          |                    |              |                    |                          |

1  
2  
3  
4  
5  
6  
7  
8  
9  
10  
11  
12  
13  
14  
15  
16  
17  
18  
19  
20  
21  
22  
23  
24  
25  
26  
27  
28  
29  
30  
31  
32  
33  
34  
35  
36  
37  
38  
39  
40  
41  
42  
43  
44  
45  
46  
47  
48  
49

|                      |                    |            |                    |        |                    |            |                    |        |
|----------------------|--------------------|------------|--------------------|--------|--------------------|------------|--------------------|--------|
| MetS, n              | 205                | 2,727      | 2,450              |        | 101                | 1,115      | 504                |        |
| Model 1 <sup>b</sup> | 0.62(0.54 to 0.72) | 1.00 (Ref) | 1.84(1.73 to 1.95) | <0.001 | 0.73(0.59 to 0.92) | 1.00 (Ref) | 1.32(1.17 to 1.49) | <0.001 |
| Model 2 <sup>c</sup> | 0.62(0.54 to 0.72) | 1.00 (Ref) | 1.82(1.72 to 1.94) | <0.001 | 0.73(0.58 to 0.91) | 1.00 (Ref) | 1.32(1.17 to 1.49) | <0.001 |
| Model 3 <sup>d</sup> | 0.81(0.67 to 0.97) | 1.00 (Ref) | 1.15(1.07 to 1.24) | <0.001 | 0.87(0.68 to 1.12) | 1.00 (Ref) | 1.00(0.87 to 1.14) | 0.553  |

NCEP-ATPIII= the National Cholesterol Education Program, Adult Treatment Panel III: the presence of three or more of the following risk factors:

- 1) waist circumference  $\geq 90$  cm in men and  $\geq 80$  cm in women, 2) triglyceride level  $\geq 150$  mg/dL (1.7 mmol/L), 3) HDL-C level  $< 40$  mg/dL (1.04 mmol/L) in men and  $< 50$  mg/dL (1.3 mmol/L) in women, 4) blood pressure  $\geq 130$  mm Hg systolic or  $\geq 85$  mm Hg diastolic, 5) fasting glucose level  $\geq 100$  mg/dL (5.6 mmol/L); Ref=Reference; IDF= International Diabetes Federation: waist circumference  $\geq 90$  cm in men and  $\geq 80$  cm in women, and any two of the following factors: 1) HDL-C level  $< 40$  mg/dL (1.04 mmol/L) in men and  $< 50$  mg/dL (1.29 mmol/L) in women, 2) triglyceride level  $\geq 150$  mg/dL (1.7mmol/L), 3) blood pressure  $\geq 130$  mm Hg systolic or  $\geq 85$  mm Hg diastolic, 4) fasting glucose level  $\geq 100$  mg/dL (5.6 mmol/L).

<sup>a</sup> Multiple logistic regression, assigning ordinal number (0 to 2) to eating rate.

<sup>b</sup> Adjusted for age.

1  
2  
3  
4  
5  
6  
7<sup>c</sup> Adjusted for age, smoking status, alcohol, and regular physical activity.  
8  
9

10<sup>d</sup> Adjusted for age, smoking status, alcohol, regular physical activity, and body mass index.  
11  
12  
13  
14  
15  
16  
17  
18  
19  
20  
21  
22  
23  
24  
25  
26  
27  
28  
29  
30  
31  
32  
33  
34  
35  
36  
37  
38  
39  
40  
41  
42  
43  
44  
45

Table 3. Odds ratios and 95% confidence intervals for components of metabolic syndrome according to eating rate (n = 56,865)

| Eating rate                      | Men (n = 41,820)   |               |                    | P for trend <sup>a</sup> | Women (n = 15,045) |              |                    | P for trend <sup>a</sup> |
|----------------------------------|--------------------|---------------|--------------------|--------------------------|--------------------|--------------|--------------------|--------------------------|
|                                  | slow               | normal        | fast               |                          | slow               | normal       | fast               |                          |
| n (%)                            | 2,821 (6.8)        | 24,893 (59.5) | 14,106 (33.7)      |                          | 1,398 (9.3)        | 9,893 (65.8) | 3,754 (24.9)       |                          |
| Central obesity <sup>b</sup>     |                    |               |                    |                          |                    |              |                    |                          |
| Model 1 <sup>c</sup>             | 0.63(0.56 to 0.71) | 1.00 (Ref)    | 1.98(1.89 to 2.08) | <0.001                   | 0.73(0.64 to 0.83) | 1.00 (Ref)   | 1.44(1.34 to 1.56) | <0.001                   |
| Model 2 <sup>d</sup>             | 0.63(0.56 to 0.70) | 1.00 (Ref)    | 1.97(1.88 to 2.07) | <0.001                   | 0.73(0.64 to 0.83) | 1.00 (Ref)   | 1.44(1.33 to 1.56) | <0.001                   |
| High blood pressure <sup>e</sup> |                    |               |                    |                          |                    |              |                    |                          |
| Model 1 <sup>c</sup>             | 0.75(0.69 to 0.82) | 1.00 (Ref)    | 1.22(1.17 to 1.27) | <0.001                   | 0.76(0.66 to 0.88) | 1.00 (Ref)   | 1.10(1.01 to 1.21) | <0.001                   |
| Model 2 <sup>d</sup>             | 0.74(0.68 to 0.81) | 1.00 (Ref)    | 1.20(1.15 to 1.26) | <0.001                   | 0.76(0.65 to 0.88) | 1.00 (Ref)   | 1.10(1.00 to 1.20) | <0.001                   |



|                                          |                    |            |                    |        |                     |            |                    |       |
|------------------------------------------|--------------------|------------|--------------------|--------|---------------------|------------|--------------------|-------|
| Model 3 <sup>f</sup>                     | 0.88(0.81 to 0.96) | 1.00 (Ref) | 0.97(0.93 to 1.02) | 0.645  | 0.85(0.72 to 0.99)  | 1.00 (Ref) | 0.93(0.84 to 1.02) | 0.923 |
| High fasting plasma glucose <sup>g</sup> |                    |            |                    |        |                     |            |                    |       |
| Model 1 <sup>c</sup>                     | 0.78(0.71 to 0.87) | 1.00 (Ref) | 1.17(1.12 to 1.23) | <0.001 | 1.03(0.85 to 1.25)  | 1.00 (Ref) | 1.17(1.04 to 1.31) | 0.035 |
| Model 2 <sup>d</sup>                     | 0.78(0.71 to 0.87) | 1.00 (Ref) | 1.16(1.11 to 1.22) | <0.001 | 1.03(0.85 to 1.25)  | 1.00 (Ref) | 1.16(1.03 to 1.31) | 0.042 |
| Model 3 <sup>f</sup>                     | 0.88(0.80 to 0.98) | 1.00 (Ref) | 0.99(0.94 to 1.05) | 0.238  | 1.14(0.94 to 1.40)  | 1.00 (Ref) | 1.02(0.90 to 1.15) | 0.536 |
| High triglyceride <sup>h</sup>           |                    |            |                    |        |                     |            |                    |       |
| Model 1 <sup>c</sup>                     | 0.88(0.80 to 0.96) | 1.00 (Ref) | 1.32(1.26 to 1.38) | <0.001 | 0.83(0.67 to 1.01)  | 1.00 (Ref) | 1.14(1.01 to 1.28) | 0.002 |
| Model 2 <sup>d</sup>                     | 0.90(0.82 to 0.98) | 1.00 (Ref) | 1.33(1.27 to 1.39) | <0.001 | 0.81(0.66 to 1.00)  | 1.00 (Ref) | 1.13(1.01 to 1.27) | 0.002 |
| Model 3 <sup>f</sup>                     | 1.08(0.98 to 1.19) | 1.00 (Ref) | 1.07(1.02 to 1.12) | 0.121  | 0.90(0.73 to 1.11)  | 1.00 (Ref) | 0.98(0.87 to 1.11) | 0.753 |
| Low HDL-C <sup>i</sup>                   |                    |            |                    |        |                     |            |                    |       |
| Model 1 <sup>c</sup>                     | 0.83(0.73 to 0.96) | 1.00 (Ref) | 1.34(1.26 to 1.43) | <0.001 | 0.90 (0.74 to 1.09) | 1.00 (Ref) | 1.11(0.99 to 1.25) | 0.018 |

1  
2  
3  
4  
5  
6  
7  
8  
9  
10  
11  
12  
13  
14  
15  
16  
17  
18  
19  
20  
21  
22  
23  
24  
25  
26  
27  
28  
29  
30  
31  
32  
33  
34  
35  
36  
37  
38  
39  
40  
41  
42  
43  
44  
45  
46  
47  
48  
49

|                      |                    |            |                    |        |                    |            |                    |       |
|----------------------|--------------------|------------|--------------------|--------|--------------------|------------|--------------------|-------|
| Model 2 <sup>d</sup> | 0.83(0.73 to 0.96) | 1.00 (Ref) | 1.36(1.28 to 1.45) | <0.001 | 0.89(0.74 to 1.08) | 1.00 (Ref) | 1.12(1.00 to 1.26) | 0.011 |
| Model 3 <sup>f</sup> | 0.97(0.84 to 1.12) | 1.00 (Ref) | 1.10(1.03 to 1.18) | 0.004  | 1.00(0.82 to 1.22) | 1.00 (Ref) | 0.96(0.85 to 1.08) | 0.500 |

Ref=Reference; BMI=body mass index; HDL-C=high to density lipoprotein cholesterol.

<sup>a</sup> Multiple logistic regression, assigning ordinal number (0 to 2) to eating rate.

<sup>b</sup> Waist circumference  $\geq 90$  cm in men,  $\geq 80$  cm in women.

<sup>c</sup> Adjusted for age.

<sup>d</sup> Adjusted for age, smoking status, alcohol, and regular physical activity.

<sup>e</sup> Blood pressure  $\geq 130$  mm Hg for systolic or  $\geq 85$  mm Hg for diastolic.

<sup>f</sup> Adjusted for age, smoking status, alcohol, regular physical activity and body mass index.

<sup>g</sup> Fasting plasma glucose  $\geq 100$  mg/dL or under medication.

<sup>h</sup> Triglyceride  $\geq 150$  mg/dL or under medication.

<sup>i</sup> HDL-C  $< 40$  mg/dL in men,  $< 50$  mg/dL in women or under medication.

## Acknowledgments

The authors would like to thank Dr. Nobuo Yanagisawa and Dr. Takeshi Kawaguchi for their coordinating the study.

Contributors: SN and KKurotani designed study and drafted the manuscript. SN, NMP, AN, KKuwahara performed the data analysis. MD collected and interpreted the data. All authors have participated in the interpretation of the findings, revised it critically for important intellectual content and approved final version to be published. TM and YN provided administrative, technical and material support. SN and TM are guarantors.

Funding: This study was supported by the Industrial Health Foundation.

Competing interests: All authors have completed the ICMJE uniform disclosure form at [www.icmje.org/coi\\_disclosure.pdf](http://www.icmje.org/coi_disclosure.pdf) and declare: all authors declare no interests.

Ethical approval: The research protocol was approved by the Ethics Committee of the National Center for Global Health and Medicine and the Ethics Committee of Toho University.

Data sharing: No additional data available.

Transparency: SN affirms that the manuscript is an honest, accurate, and transparent account of the study being reported; that no important aspects of the study have been omitted; and that any discrepancies from the study as planned (and, if relevant,

1  
2  
3  
4  
5  
6  
7  
8  
9  
10  
11  
12  
13  
14  
15  
16  
17  
18  
19  
20  
21  
22  
23  
24  
25  
26  
27  
28  
29  
30  
31  
32  
33  
34  
35  
36  
37  
38  
39  
40  
41  
42  
43  
44  
45  
46  
47  
48  
49  
50  
51  
52  
53  
54  
55  
56  
57  
58  
59  
60

registered) have been explained.

For peer review only

## References

1. Eckel RH, Alberti KG, Grundy SM, et al. The metabolic syndrome. *Lancet* 2010;**375**:181-83.
2. Gomez-Martinez S, Martinez-Gomez D, Perez de Heredia F, et al. Eating habits and total and abdominal fat in Spanish adolescents: influence of physical activity. The AVENA study. *J Adolesc Health* 2012;**50**:403-09.
3. Ilanne-Parikka P, Eriksson JG, Lindstrom J, et al. Effect of lifestyle intervention on the occurrence of metabolic syndrome and its components in the Finnish Diabetes Prevention Study. *Diabetes care* 2008;**31**:805-07.
4. Nanri A, Tomita K, Matsushita Y, et al. Effect of six months lifestyle intervention in Japanese men with metabolic syndrome: randomized controlled trial. *J Occup Health* 2012;**54**:215-22.
5. Ferster CB, Nurnberger JI, Levitt EB. The control of eating. 1962. *Obes Res* 1996;**4**:401-10.
6. Hill SW, McCutcheon NB. Eating responses of obese and nonobese humans during dinner meals. *Psychosom Med* 1975;**37**:395-401.
7. Bellack AS. Behavior therapy for weight reduction. *Addict Behav* 1975;**1**:73-82.
8. Otsuka R, Tamakoshi K, Yatsuya H, et al. Eating fast leads to obesity: findings based

1  
2  
3  
4  
5  
6 on self-administered questionnaires among middle-aged Japanese men and women. *J*  
7  
8  
9 *Epidemiol* 2006;**16**:117-24.

10  
11 9. Sasaki S, Katagiri A, Tsuji T, et al. Self-reported rate of eating correlates with body  
12  
13 mass index in 18-y-old Japanese women. *Int J Obes Relat Metab Disord*  
14  
15 2003;**27**:1405-10.  
16  
17

18  
19 10. Maruyama K, Sato S, Ohira T, et al. The joint impact on being overweight of self  
20  
21 reported behaviours of eating quickly and eating until full: cross sectional survey. *Bmj*  
22  
23 2008;**337**:a2002.  
24  
25  
26

27  
28 11. Lee KS, Kim DH, Jang JS, et al. Eating rate is associated with cardiometabolic risk  
29  
30 factors in Korean adults. *Nut Metab Cardiovasc Dis* 2013;**23**:635-41.  
31  
32

33  
34 12. Otsuka R, Tamakoshi K, Yatsuya H, et al. Eating fast leads to insulin resistance:  
35  
36 findings in middle-aged Japanese men and women. *Prev Med* 2008;**46**:154-59.  
37  
38

39  
40 13. Radzeviciene L, Ostrauskas R. Fast eating and the risk of type 2 diabetes mellitus: a  
41  
42 case-control study. *Clin Nutr* 2013;**32**:232-35.  
43  
44

45  
46 14. Ohkuma T, Fujii H, Iwase M, et al. Impact of eating rate on obesity and  
47  
48 cardiovascular risk factors according to glucose tolerance status: the Fukuoka Diabetes  
49  
50 Registry and the Hisayama Study. *Diabetologia* 2013;**56**:70-77.  
51  
52

53  
54 15. Shigeta H, Shigeta M, Nakazawa A, et al. Lifestyle, obesity, and insulin resistance.  
55  
56  
57  
58  
59  
60

1  
2  
3  
4  
5  
6  
7  
8  
9  
10  
11  
12  
13  
14  
15  
16  
17  
18  
19  
20  
21  
22  
23  
24  
25  
26  
27  
28  
29  
30  
31  
32  
33  
34  
35  
36  
37  
38  
39  
40  
41  
42  
43  
44  
45  
46  
47  
48  
49  
50  
51  
52  
53  
54  
55  
56  
57  
58  
59  
60

*Diabetes care* 2001;**24**:608.

16. Gerace TA, George VA. Predictors of weight increases over 7 years in fire fighters and paramedics. *Prev Med* 1996;**25**:593-600.

17. Tanihara S, Imatoh T, Miyazaki M, et al. Retrospective longitudinal study on the relationship between 8-year weight change and current eating speed. *Appetite* 2011;**57**:179-83.

18. Sakurai M, Nakamura K, Miura K, et al. Self-reported speed of eating and 7-year risk of type 2 diabetes mellitus in middle-aged Japanese men. *Metabolism* 2012;**61**:1566-71.

19. Kral JG, Buckley MC, Kissileff HR, et al. Metabolic correlates of eating behavior in severe obesity. *Int J Obes Relat Metab Disord* 2001;**25**:258-64.

20. Shin A, Lim SY, Sung J, et al. Dietary intake, eating habits, and metabolic syndrome in Korean men. *J Am Diet Assoc* 2009;**109**:633-40.

21. Grundy SM, Cleeman JI, Daniels SR, et al. Diagnosis and management of the metabolic syndrome: an American Heart Association/National Heart, Lung, and Blood Institute Scientific Statement. *Circulation* 2005;**112**:2735-52.

22. Alberti KG, Zimmet P, Shaw J. Metabolic syndrome--a new world-wide definition. A Consensus Statement from the International Diabetes Federation. *Diabet Med*

1  
2  
3  
4  
5  
6 2006;23:469-80.  
7

8  
9 23. Shen W, Punyanitya M, Chen J, et al. Waist circumference correlates with metabolic  
10  
11 syndrome indicators better than percentage fat. *Obesity (Silver Spring)* 2006;14:727-36.  
12  
13

14 24. Questionnaire of Specific Health Checkups. Secondary Questionnaire of Specific  
15  
16 Health Checkups. Available at: <http://www.mhlw.go.jp/english/wp/wp-hw3/dl/2-007.pdf>.  
17  
18  
19 Accessed 21 Feb 2014.  
20  
21  
22

23 25. Specific Health Checkups and Specific Health Guidance. Secondary Specific Health  
24  
25 Checkups and Specific Health Guidance. Available at:  
26  
27  
28 [http://www.mhlw.go.jp/seisakunitsuite/bunya/kenkou\\_iryuu/kenkou/seikatsu/dl/hoken-p](http://www.mhlw.go.jp/seisakunitsuite/bunya/kenkou_iryuu/kenkou/seikatsu/dl/hoken-p)  
29  
30  
31  
32 rogram2\_02.pdf. Accessed 21 Feb 2014.  
33  
34

35 26. Hill SW, McCutcheon NB. Contributions of obesity, gender, hunger, food preference,  
36  
37 and body size to bite size, bite speed, and rate of eating. *Appetite* 1984;5:73-83.  
38  
39

40 27. Ekuni D, Furuta M, Takeuchi N, et al. Self-reports of eating quickly are related to a  
41  
42 decreased number of chews until first swallow, total number of chews, and total  
43  
44 duration of chewing in young people. *Arch Oral Biol* 2012;57:981-86.  
45  
46  
47

48  
49 28. Rolls ET. Sensory processing in the brain related to the control of food intake. *Proc*  
50  
51  
52 *Nutr Soc* 2007;66:96-112.  
53  
54

55 29. Morton GJ, Cummings DE, Baskin DG, et al. Central nervous system control of  
56  
57  
58  
59  
60



1  
2  
3  
4  
5  
6 food intake and body weight. *Nature* 2006;**443**:289-95.

7  
8  
9 30. de Graaf C, Blom WA, Smeets PA, et al. Biomarkers of satiation and satiety. *Am J*  
10  
11  
12 *Clin Nutr* 2004;**79**:946-61.

13  
14  
15 31. Kokkinos A, le Roux CW, Alexiadou K, et al. Eating slowly increases the  
16  
17  
18 postprandial response of the anorexigenic gut hormones, peptide YY and glucagon-like  
19  
20  
21 peptide-1. *J Clin Endocrinol Metab* 2010;**95**:333-37.

22  
23  
24 32. Sobki SH, Zaid AA, Khan HA, et al. Significant impact of pace of eating on serum  
25  
26  
27 ghrelin and glucose levels. *Clin Biochem* 2010;**43**:522-24.

28  
29  
30 33. Viskaal-van Dongen M, Kok FJ, de Graaf C. Eating rate of commonly consumed  
31  
32  
33 foods promotes food and energy intake. *Appetite* 2011;**56**:25-31.

34  
35  
36 34. Scisco JL, Muth ER, Dong Y, et al. Slowing bite-rate reduces energy intake: an  
37  
38  
39 application of the bite counter device. *J Am Diet Assoc* 2011;**111**:1231-35.

40  
41  
42 35. Mochizuki K, Misaki Y, Miyauchi R, et al. A higher rate of eating is associated with  
43  
44  
45 higher circulating interleukin-1beta concentrations in Japanese men not being treated for  
46  
47  
48 metabolic diseases. *Nutrition* 2012;**28**:978-83.

49  
50  
51 36. Besedovsky H, del Rey A, Sorkin E, et al. Immunoregulatory feedback between  
52  
53  
54 interleukin-1 and glucocorticoid hormones. *Science* 1986;**233**:652-54

55  
56  
57 37. Matsuki T, Horai R, Sudo K, et al. IL-1 plays an important role in lipid metabolism  
58  
59  
60

1  
2  
3  
4  
5  
6 by regulating insulin levels under physiological conditions. *J Exp Med*

7  
8  
9 2003;**198**:877-88.

10  
11 38. Speaker KJ, Fleshner M. Interleukin-1 beta: a potential link between stress and the  
12 development of visceral obesity. *BMC physiol* 2012;**27**:8.

13  
14  
15  
16  
17 39. Thorand B, Baumert J, Doring A, et al. Sex differences in the relation of body  
18 composition to markers of inflammation. *Atherosclerosis* 2006;**184**:216-24.  
19  
20  
21  
22  
23  
24  
25  
26  
27  
28  
29  
30  
31  
32  
33  
34  
35  
36  
37  
38  
39  
40  
41  
42  
43  
44  
45  
46  
47  
48  
49  
50  
51  
52  
53  
54  
55  
56  
57  
58  
59  
60

STROBE Statement—Checklist of items that should be included in reports of *cross-sectional studies*

MS ID#: BMJ.2014.018520

MS TITLE: Eating rate and prevalence of metabolic syndrome in Japanese.

|                              | Item No | Recommendation                                                                                                                                                                       | Location in manuscript                                                           |
|------------------------------|---------|--------------------------------------------------------------------------------------------------------------------------------------------------------------------------------------|----------------------------------------------------------------------------------|
| <b>Title and abstract</b>    | 1       | (a) Indicate the study's design with a commonly used term in the title or the abstract                                                                                               | Line 20 on page 2                                                                |
|                              |         | (b) Provide in the abstract an informative and balanced summary of what was done and what was found                                                                                  | What was done: line 18-19 on page 2<br>What was found: line 40-42 on page 2      |
| <b>Introduction</b>          |         |                                                                                                                                                                                      |                                                                                  |
| Background/rationale         | 2       | Explain the scientific background and rationale for the investigation being reported                                                                                                 | Scientific background: line 50-73 on page 5<br>Rationale: Line 73-78 on page 5-6 |
| Objectives                   | 3       | State specific objectives, including any prespecified hypotheses                                                                                                                     | Line 67-68 and line 77-78 on page 6                                              |
| <b>Methods</b>               |         |                                                                                                                                                                                      |                                                                                  |
| Study design                 | 4       | Present key elements of study design early in the paper                                                                                                                              | Line 74 on page 6                                                                |
| Setting                      | 5       | Describe the setting, locations, and relevant dates, including periods of recruitment, exposure, follow-up, and data collection                                                      | Line 82-85 on page 6-7                                                           |
| Participants                 | 6       | (a) Give the eligibility criteria, and the sources and methods of selection of participants                                                                                          | Line 85-92 on page 7                                                             |
| Variables                    | 7       | Clearly define all outcomes, exposures, predictors, potential confounders, and effect modifiers. Give diagnostic criteria, if applicable                                             | Line 118-150 on page 8-10                                                        |
| Data sources/<br>measurement | 8*      | For each variable of interest, give sources of data and details of methods of assessment (measurement). Describe comparability of assessment methods if there is more than one group | Line 100-102 on page 7                                                           |
| Bias                         | 9       | Describe any efforts to address potential sources of bias                                                                                                                            | Exclusion: line 85-92 on page 7<br>Adjustment: line 145-151 on page 10           |
| Study size                   | 10      | Explain how the study size was arrived at                                                                                                                                            | Not provided                                                                     |
| Quantitative<br>variables    | 11      | Explain how quantitative variables were handled in the analyses. If applicable, describe which groupings were chosen and why                                                         | Line 144-151 on page 10                                                          |

|    |                     |     |                                                                                                                                                                                                              |
|----|---------------------|-----|--------------------------------------------------------------------------------------------------------------------------------------------------------------------------------------------------------------|
| 1  |                     |     |                                                                                                                                                                                                              |
| 2  |                     |     |                                                                                                                                                                                                              |
| 3  |                     |     |                                                                                                                                                                                                              |
| 4  | Statistical methods | 12  | (a) Describe all statistical methods, including those used to control for confounding                                                                                                                        |
| 5  |                     |     | Line 134-156 on page 9-10                                                                                                                                                                                    |
| 6  |                     |     | (b) Describe any methods used to examine subgroups and interactions                                                                                                                                          |
| 7  |                     |     | Line 151-153 on page 10                                                                                                                                                                                      |
| 8  |                     |     | (c) Explain how missing data were addressed                                                                                                                                                                  |
| 9  |                     |     | We excluded participants who had missing information on potential confounding variables (line 89 on page 7).                                                                                                 |
| 10 |                     |     | (d) If applicable, describe analytical methods taking account of sampling strategy                                                                                                                           |
| 11 |                     |     | N/A                                                                                                                                                                                                          |
| 12 |                     |     | (e) Describe any sensitivity analyses                                                                                                                                                                        |
| 13 |                     |     | N/A                                                                                                                                                                                                          |
| 14 | <b>Results</b>      |     |                                                                                                                                                                                                              |
| 15 | Participants        | 13* | (a) Report numbers of individuals at each stage of study—eg numbers potentially eligible, examined for eligibility, confirmed eligible, included in the study, completing follow-up, and analysed            |
| 16 |                     |     | Line 159-160 on page 11                                                                                                                                                                                      |
| 17 |                     |     | Table 1                                                                                                                                                                                                      |
| 18 |                     |     | (b) Give reasons for non-participation at each stage                                                                                                                                                         |
| 19 |                     |     | N/A                                                                                                                                                                                                          |
| 20 |                     |     | (c) Consider use of a flow diagram                                                                                                                                                                           |
| 21 |                     |     | N/A                                                                                                                                                                                                          |
| 22 | Descriptive data    | 14* | (a) Give characteristics of study participants (eg demographic, clinical, social) and information on exposures and potential confounders                                                                     |
| 23 |                     |     | Table 1                                                                                                                                                                                                      |
| 24 |                     |     | Line 159-164 on page 11                                                                                                                                                                                      |
| 25 |                     |     | (b) Indicate number of participants with missing data for each variable of interest                                                                                                                          |
| 26 |                     |     | N/A                                                                                                                                                                                                          |
| 27 | Outcome data        | 15* | Report numbers of outcome events or summary measures                                                                                                                                                         |
| 28 |                     |     | Table 2                                                                                                                                                                                                      |
| 29 |                     |     | Line 159-160 on page 11                                                                                                                                                                                      |
| 30 | Main results        | 16  | (a) Give unadjusted estimates and, if applicable, confounder-adjusted estimates and their precision (eg, 95% confidence interval). Make clear which confounders were adjusted for and why they were included |
| 31 |                     |     | Table 2, Table3                                                                                                                                                                                              |
| 32 |                     |     | Line 165-187 on page 11-12                                                                                                                                                                                   |
| 33 |                     |     | (b) Report category boundaries when continuous variables were categorized                                                                                                                                    |
| 34 |                     |     | Table2, Table3                                                                                                                                                                                               |
| 35 |                     |     | (c) If relevant, consider translating estimates of relative risk into absolute risk for a meaningful time period                                                                                             |
| 36 |                     |     | N/A                                                                                                                                                                                                          |
| 37 | Other analyses      | 17  | Report other analyses done—eg analyses of subgroups and interactions, and sensitivity analyses                                                                                                               |
| 38 |                     |     | Line 152-153 on page 10                                                                                                                                                                                      |
| 39 | <b>Discussion</b>   |     |                                                                                                                                                                                                              |
| 40 | Key results         | 18  | Summarise key results with reference to study objectives                                                                                                                                                     |
| 41 |                     |     | Line 190-194 on page 12-13                                                                                                                                                                                   |
| 42 | Limitations         | 19  | Discuss limitations of the study, taking into account sources of potential bias                                                                                                                              |
| 43 |                     |     | Line 237-246 on page 15                                                                                                                                                                                      |

|                          |    |                                                                                                                                                                            |                                                                                           |
|--------------------------|----|----------------------------------------------------------------------------------------------------------------------------------------------------------------------------|-------------------------------------------------------------------------------------------|
|                          |    | or imprecision. Discuss both direction and magnitude of any potential bias                                                                                                 |                                                                                           |
| Interpretation           | 20 | Give a cautious overall interpretation of results considering objectives, limitations, multiplicity of analyses, results from similar studies, and other relevant evidence | Line 197-219 on page 13-14                                                                |
| Generalisability         | 21 | Discuss the generalisability (external validity) of the study results                                                                                                      | Line 247-251 on page 16                                                                   |
| <b>Other information</b> |    |                                                                                                                                                                            |                                                                                           |
| Funding                  | 22 | Give the source of funding and the role of the funders for the present study and, if applicable, for the original study on which the present article is based              | This study was supported by the Industrial Health Foundation for drafting the manuscript. |

N/A: Not applicable.

\*Give information separately for exposed and unexposed groups.

**Note:** An Explanation and Elaboration article discusses each checklist item and gives methodological background and published examples of transparent reporting. The STROBE checklist is best used in conjunction with this article (freely available on the Web sites of PLoS Medicine at <http://www.plosmedicine.org/>, Annals of Internal Medicine at <http://www.annals.org/>, and Epidemiology at <http://www.epidem.com/>). Information on the STROBE Initiative is available at [www.strobe-statement.org](http://www.strobe-statement.org).

# BMJ Open

## Self-reported eating rate and metabolic syndrome in Japanese: cross-sectional study

|                                 |                                                                                                                                                                                                                                                                                                                                                                                                                                                                                                                                                                                                                                                                                                                                                                                                                                                                                                                                                                                                                                                                                                    |
|---------------------------------|----------------------------------------------------------------------------------------------------------------------------------------------------------------------------------------------------------------------------------------------------------------------------------------------------------------------------------------------------------------------------------------------------------------------------------------------------------------------------------------------------------------------------------------------------------------------------------------------------------------------------------------------------------------------------------------------------------------------------------------------------------------------------------------------------------------------------------------------------------------------------------------------------------------------------------------------------------------------------------------------------------------------------------------------------------------------------------------------------|
| Journal:                        | <i>BMJ Open</i>                                                                                                                                                                                                                                                                                                                                                                                                                                                                                                                                                                                                                                                                                                                                                                                                                                                                                                                                                                                                                                                                                    |
| Manuscript ID:                  | bmjopen-2014-005241.R1                                                                                                                                                                                                                                                                                                                                                                                                                                                                                                                                                                                                                                                                                                                                                                                                                                                                                                                                                                                                                                                                             |
| Article Type:                   | Research                                                                                                                                                                                                                                                                                                                                                                                                                                                                                                                                                                                                                                                                                                                                                                                                                                                                                                                                                                                                                                                                                           |
| Date Submitted by the Author:   | 31-May-2014                                                                                                                                                                                                                                                                                                                                                                                                                                                                                                                                                                                                                                                                                                                                                                                                                                                                                                                                                                                                                                                                                        |
| Complete List of Authors:       | Nagahama, Satsue; All Japan Labor Welfare Foundation, ; School of Medicine, Toho University, Department of Environmental and Occupational Health<br>Kurotani, Kayo; National Center for Global Health and Medicine, Department of Epidemiology and Prevention, Center for Clinical Sciences<br>Pham, Ngoc Minh; Thai Nguyen University of Medicine and Pharmacy, Department of Epidemiology, Faculty of Public Health<br>Nanri, Akiko; National Center for Global Health and Medicine, Department of Epidemiology and Prevention, Center for Clinical Sciences<br>Kuwahara, Keisuke; National Center for Global Health and Medicine, Department of Epidemiology and Prevention, Center for Clinical Sciences<br>Dan, Masashi; All Japan Labor Welfare Foundation, Department of Epidemiology and Prevention, Center for Clinical Sciences<br>Nishiwaki, Yuji; School of Medicine, Toho University, Department of Environmental and Occupational Health<br>Mizoue, Tetsuya; National Center for Global Health and Medicine, Department of Epidemiology and Prevention, Center for Clinical Sciences |
| <b>Primary Subject Heading</b>: | Epidemiology                                                                                                                                                                                                                                                                                                                                                                                                                                                                                                                                                                                                                                                                                                                                                                                                                                                                                                                                                                                                                                                                                       |
| Secondary Subject Heading:      | Epidemiology                                                                                                                                                                                                                                                                                                                                                                                                                                                                                                                                                                                                                                                                                                                                                                                                                                                                                                                                                                                                                                                                                       |
| Keywords:                       | EPIDEMIOLOGY, PREVENTIVE MEDICINE, PUBLIC HEALTH                                                                                                                                                                                                                                                                                                                                                                                                                                                                                                                                                                                                                                                                                                                                                                                                                                                                                                                                                                                                                                                   |
|                                 |                                                                                                                                                                                                                                                                                                                                                                                                                                                                                                                                                                                                                                                                                                                                                                                                                                                                                                                                                                                                                                                                                                    |

SCHOLARONE™  
Manuscripts

1  
2  
3  
4  
5  
6 1 **Self-reported eating rate and metabolic syndrome in Japanese: cross-sectional**  
7  
8  
9 2 **study**

10  
11  
12 3  
13  
14 4 Satsue Nagahama <sup>1 2 3\*</sup>, Kayo Kurotani <sup>1</sup>, Ngoc Minh Pham <sup>4</sup>, Akiko Nanri <sup>1</sup>, Keisuke  
15  
16  
17 5 Kuwahara <sup>1</sup>, Masashi Dan <sup>2</sup>, Yuji Nishiwaki <sup>3</sup>, Tetsuya Mizoue <sup>1</sup>  
18  
19  
20  
21 6

22  
23 7 <sup>1</sup> Department of Epidemiology and Prevention, Center for Clinical Sciences, National  
24  
25  
26 8 Center for Global Health and Medicine, 1-21-1, Toyama, Shinjuku-ku, Tokyo, Japan,  
27  
28  
29 9 Zip162-8655; Tel +81-3-3202-7181, Fax 81-3-3202-7364,  
30  
31  
32 10 E-mail: [satsue\\_0323@hotmail.com](mailto:satsue_0323@hotmail.com)  
33

34  
35 11 <sup>2</sup> All Japan Labor Welfare Foundation, Tokyo, Japan;  
36

37  
38 12 <sup>3</sup> Department of Environmental and Occupational Health, School of Medicine, Toho  
39  
40  
41 13 University, Tokyo, Japan;  
42

43  
44 14 <sup>4</sup> Department of Epidemiology, Faculty of Public Health, Thai Nguyen University of  
45  
46  
47 15 Medicine and Pharmacy, Thai Nguyen Province, Vietnam;  
48

49  
50 16

51  
52 17 Keywords: eating rate, metabolic syndrome, health checkup, Japan, Joint Interim  
53  
54  
55 18 Statement  
56  
57  
58  
59  
60

19 Word count: 2373

For peer review only

1  
2  
3  
4  
5  
6  
7  
8  
9  
10  
11  
12  
13  
14  
15  
16  
17  
18  
19  
20  
21  
22  
23  
24  
25  
26  
27  
28  
29  
30  
31  
32  
33  
34  
35  
36  
37  
38  
39  
40  
41  
42  
43  
44  
45  
46  
47  
48  
49  
50  
51  
52  
53  
54  
55  
56  
57  
58  
59  
60



1  
2  
3  
4  
5  
6 20 **ABSTRACT**  
7

8  
9 21 **Objectives:** To examine the association between self-reported eating rate and metabolic  
10  
11  
12 22 syndrome.

13  
14  
15 23 **Design:** Cross-sectional study.  
16

17  
18 24 **Setting:** Annual health checkup at a health check service center in Japan.  
19

20  
21 25 **Participants:** A total of 56,865 participants (41,820 males and 15,045 females) who  
22  
23  
24 26 attended health checkup in 2011 and reported not to have a history of coronary heart  
25  
26 27 disease or stroke.  
27

28  
29 28 **Main outcome measure:** Metabolic syndrome was defined by the joint of interim  
30  
31  
32 29 statement of the International Diabetes Federation and the American Heart  
33  
34  
35 30 Association/National Heart, Lung, and Blood Institute.  
36

37  
38 31 **Results:** In multiple logistic regression models, eating rate was significantly and  
39  
40  
41 32 positively associated with metabolic syndrome. The multivariable-adjusted odds ratios  
42  
43  
44 33 (95% confidence interval) for slow, normal and fast were 0.70 (0.62 to 0.79), 1.00  
45  
46  
47 34 (reference) and 1.61 (1.53 to 1.70), respectively, in men (P for trend <0.001), and 0.74  
48  
49  
50 35 (0.60 to 0.91), 1.00 (reference) and 1.27 (1.13 to 1.43), respectively, in women (P for  
51  
52  
53 36 trend <0.001). The association of eating rate and metabolic syndrome was attenuated  
54  
55  
56 37 after further adjustment for body mass index in both sexes, but remained statistically  
57  
58  
59  
60

1  
2  
3  
4  
5  
6 38 significant in men. Of metabolic syndrome components, abdominal obesity showed the  
7  
8  
9 39 strongest association with eating rate. The associations of slow eating with high blood  
10  
11  
12 40 pressure and hyperglycemia and that of fast eating with lipid abnormality were still  
13  
14  
15 41 significant in men, even after adjustment for body mass index.  
16

17  
18 42 **Conclusions:** Results suggest that eating rate is associated with the presence of  
19  
20  
21 43 metabolic syndrome and that this association is largely accounted for by the difference  
22  
23  
24 44 of body mass according to eating rate.  
25  
26  
27  
28  
29  
30  
31  
32  
33  
34  
35  
36  
37  
38  
39  
40  
41  
42  
43  
44  
45  
46  
47  
48  
49  
50  
51  
52  
53  
54  
55  
56  
57  
58  
59  
60

1  
2  
3  
4  
5  
6 45 **Strength and Limitation**  
7

8  
9 46 This study included a large number of participants, used waist circumference in defining  
10  
11  
12 47 metabolic syndrome, and analyzed data for men and women separately.

13  
14  
15 48 Eating rate was assessed by a self-reported questionnaire. Information on dietary intake  
16  
17  
18 49 was not obtained.  
19  
20  
21  
22  
23  
24  
25  
26  
27  
28  
29  
30  
31  
32  
33  
34  
35  
36  
37  
38  
39  
40  
41  
42  
43  
44  
45  
46  
47  
48  
49  
50  
51  
52  
53  
54  
55  
56  
57  
58  
59  
60

1  
2  
3  
4  
5  
6 **50 Introduction**  
7  
8

9  
10  
11  
12  
13  
14  
15  
16  
17  
18  
19  
20  
21  
22  
23  
24  
25  
26  
27  
28  
29  
30  
31  
32  
33  
34  
35  
36  
37  
38  
39  
40  
41  
42  
43  
44  
45  
46  
47  
48  
49  
50  
51  
52  
53  
54  
55  
56  
57  
58  
59  
60  
61  
62  
63  
64  
65  
66  
67  
68  
69  
70

Metabolic syndrome (MetS) is a cluster of physiological risk factors associated with cardiovascular disease and several types of cancer.<sup>1</sup> Determination of etiologic factors for MetS is required for the establishment of public health strategies to reduce its prevalence and prevent resulting complications. Growing evidence from both observational and interventional studies suggests a role of dietary habits in the development of MetS,<sup>2-4</sup> which originates from obesity. Obesity has been extensively investigated in relation to dietary habits including eating rate since 1962, when Ferster published a theoretical and practical weight control program focusing on eating behaviors including eating rate.<sup>5</sup> Observational studies showed that obese people ate at a faster rate than non-obese people,<sup>6</sup> and reducing eating rate may be a simple and effective therapy for obesity.<sup>7</sup>

During the past decade, several cross-sectional studies have found a positive association between eating rate and overweight<sup>8-11</sup> or insulin resistance.<sup>11-15</sup> Similarly, a few longitudinal studies showed that eating fast was associated with an increased risk of weight gain<sup>16, 17</sup> and type 2 diabetes.<sup>18</sup> In addition, some cross-sectional studies have reported that fast eating was positively associated with hypertriglyceridemia and low high-density lipoprotein cholesterol (HDL-C).<sup>11, 14, 19</sup> Therefore it is conceivable that

1  
2  
3  
4  
5  
6 68 eating rate may be associated with MetS. To our knowledge, however, only one Korean  
7  
8  
9 69 study cross-sectionally examined eating rate in relation to MetS.<sup>20</sup> In that study, MetS  
10  
11  
12 70 was defined by using body mass index (BMI), rather than waist circumference, and  
13  
14  
15 71 investigated the association in men only. Waist circumference is a component of most  
16  
17  
18 72 MetS definitions as a surrogate of central obesity, which can better predict  
19  
20  
21 73 cardiovascular risk.<sup>21</sup> It is therefore necessary to examine the relationship between  
22  
23  
24 74 eating rate and MetS using waist circumference in both sexes. Here, we investigated  
25  
26  
27 75 cross-sectionally the association between self-reported eating rate and the presence of  
28  
29  
30 76 MetS according to the joint of interim statement of the International Diabetes Federation  
31  
32  
33 77 and the American Heart Association/National Heart, Lung, and Blood Institute (JIS)<sup>22</sup>  
34  
35  
36 78 using a large dataset of health checkup in Japanese men and women.  
37  
38  
39  
40  
41  
42  
43  
44  
45  
46  
47  
48  
49  
50  
51  
52  
53  
54  
55  
56  
57  
58  
59  
60

## 80 **METHODS AND PROCEDURES**

### 81 **Study population**

82 In Japan, health checkup under occupational health and safety law is mandatory  
83 for all employed workers<sup>23</sup> and has been modified in 2008 when the recommendation  
84 for new national health checkup system focusing on MetS has been launched.<sup>24</sup> Study  
85 participants were attendants of 2011 (calendar year) annual health checkup at All Japan

1  
2  
3  
4  
5  
6 86 Labor Welfare Foundation (Tokyo), a health service center performing health checkup.  
7  
8  
9 87 Participants were mainly Japanese employees but also included a small number of their  
10  
11  
12 88 dependents and foreign workers, aged 17-99 in men and 17-85 in women. Of 297,148  
13  
14  
15 89 participants, we excluded 3,660 with a history of myocardial infarction, coronary heart  
16  
17  
18 90 disease or stroke, 24,452 with missing information on eating rate, 192,581 who took  
19  
20  
21 91 meal within 8 hours or provided no information on meal time, 204,423 with missing  
22  
23  
24 92 data for any of the components of MetS, 15,886 with missing information on covariates  
25  
26  
27 93 (BMI, smoking status, alcohol consumption and physical activity). Some participants  
28  
29  
30 94 met more than one of these exclusion criteria, leaving 56,865 participants (41,820 males  
31  
32  
33 95 and 15,045 females) for analysis. We did not obtain written informed consent from each  
34  
35  
36 96 participant; instead, we disclosed the execution of the study by showing posters, giving  
37  
38  
39 97 participants an opportunity to refuse the use of their data for the study. This procedure  
40  
41  
42 98 conforms to the Japanese Ethical Guidelines for Epidemiological Research. The  
43  
44  
45 99 research protocol was approved by the Ethics Committee of the National Center for  
46  
47  
48 100 Global Health and Medicine and the Ethics Committee of Toho University.

#### 101 **Data collection and measurements**

102 A self-administered questionnaire, which was recommended for specific health  
103 examination by the Japanese government (Ministry of Health, Labour and Welfare),<sup>25</sup>

1  
2  
3  
4  
5  
6 104 was used to assess eating rate, medical history and health-related lifestyles including  
7  
8  
9 105 smoking, alcohol consumption and regular physical activity. Eating rate was assessed by  
10  
11  
12 106 asking “How fast is your speed of eating?”, with three response options (slow, normal  
13  
14  
15 107 and fast). A trained staff measured height to the nearest 0.1 cm, weight to the nearest 0.1  
16  
17  
18 108 kg and waist circumference to the nearest 0.1 cm at the umbilical level in a standing  
19  
20  
21 109 position. BMI was calculated as the weight in kilograms divided by the squared height  
22  
23  
24 110 in meters. Blood pressure in the sitting position was measured using an automated  
25  
26  
27 111 machine (HEM-907, Omron, Kyoto, Japan). Participants with high blood pressure  
28  
29  
30 112 ( $\geq 130$  mm Hg systolic or  $\geq 85$  mm Hg diastolic) received another measurement and data  
31  
32  
33 113 showing lower systolic blood pressure was used. Venous blood sample was collected,  
34  
35  
36 114 stored in a cooler at 4 degrees for transportation to an external laboratory (SRL, Tokyo,  
37  
38  
39 115 Japan) and measured within 24 hours of blood drawing. Triglyceride level was  
40  
41  
42 116 measured by enzymatic colorimetric test (Bio Majesty JCA-BM8060, JEOL, Tokyo,  
43  
44  
45 117 Japan). HDL-C level was determined by a direct method (Bio Majesty JCA-BM8060,  
46  
47  
48 118 JEOL, Tokyo, Japan). Plasma glucose levels were determined using by the hexokinase  
49  
50  
51 119 method (an automatic clinical chemistry analyzer JCA-BM9000 series, JEOL, Tokyo,  
52  
53  
54 120 Japan).

55 121 **Definitions for MetS**  
56  
57  
58  
59  
60

1  
2  
3  
4  
5  
6 122 According to the JIS criteria, MetS was defined as three or more of the  
7  
8  
9 123 following risk factors: 1) waist circumference for Asian population  $\geq 90$  cm in men and  
10  
11  
12 124  $\geq 80$  cm in women, 2) triglyceride level  $\geq 150$  mg/dL (1.7 mmol/L), 3) HDL-C level  $< 40$   
13  
14  
15 125 mg/dL (1.04 mmol/L) in men and  $< 50$  mg/dL (1.3 mmol/L) in women, 4) blood  
16  
17  
18 126 pressure  $\geq 130$  mm Hg systolic or  $\geq 85$  mm Hg diastolic, 5) fasting glucose level  $\geq 100$   
19  
20  
21 127 mg/dL (5.6 mmol/L).<sup>22</sup> Participants under medication for diabetes, hypertension and  
22  
23  
24 128 dyslipidemia were considered as having respective factor, irrespective of measured data.

### 25 26 129 **Statistical analysis**

27  
28  
29 130 Participants were divided into three groups according to eating rate (slow,  
30  
31  
32 131 normal and fast). The characteristics of participants across eating rate categories were  
33  
34  
35 132 expressed as means (standard deviation) for continuous variables and percentages for  
36  
37  
38 133 categorical variables, respectively. Fasting plasma glucose and triglyceride were  
39  
40  
41 134 expressed as medians (interquartile range) due to their skewed distribution. Trend  
42  
43  
44 135 association was assessed by assigning ordinal numbers (0 to 2) to the categories of  
45  
46  
47 136 eating rate (slow, normal and fast, respectively) and was tested using linear regression,  
48  
49  
50 137 an extension of the Wilcoxon Rank-Sum test and logistic regression, as appropriate.  
51  
52  
53 138 Multiple logistic regression analysis was used to estimate the odds ratios (OR) with  
54  
55  
56 139 95% confidence intervals (CI) for the presence of MetS across eating rate categories,  
57  
58  
59  
60



1  
2  
3  
4  
5  
6 140 with normal eating rate as the reference. We adjusted for age (continuous, year) in the  
7  
8  
9 141 basic model. In the second model, we further adjusted for smoking status (non-smoker,  
10  
11  
12 142 daily smoker consuming <20 cigarettes per day or  $\geq 20$  cigarettes per day), physical  
13  
14  
15 143 activity (walking time <60 min per day or  $\geq 60$  min per day), and alcohol consumption  
16  
17  
18 144 (non-drinker, <1 *go*, 1 to <2 *go* or  $\geq 2$  *go* per day; one *go* of sake, Japanese traditional  
19  
20  
21 145 beverage, is about 180 ml of 10 to 14% of ethanol and contains ~23g of ethanol). In the  
22  
23  
24 146 third model, we added BMI (continuous,  $\text{kg/m}^2$ ) to the second model. We performed  
25  
26  
27 147 likelihood ratio test for testing the interaction between eating rate and sex. All analyses  
28  
29  
30 148 were done for men and women separately because the interaction was significant (P for  
31  
32  
33 149 interaction <0.001). We repeated the above analyses for each component of MetS.  
34  
35  
36 150 Two-tailed P value <0.05 was considered statistically significant. All statistical analyses  
37  
38  
39 151 were performed with STATA, version 12.1 (StataCorp, College Station, TX, USA).

40  
41 152

## 42 43 44 153 **RESULTS**

45  
46  
47 154 The prevalence of MetS was 18.5% in men and 12.9% in women. **Table 1**  
48  
49  
50 155 shows characteristics of the study participants across categories of eating rate. Men who  
51  
52  
53 156 ate fast tended to be young, whereas women who ate slowly tended to be young. Those  
54  
55  
56 157 who ate fast had significantly higher BMI, waist circumference, triglyceride level and

1  
2  
3  
4  
5  
6 158 systolic and diastolic blood pressures and lower HDL-C level in both men and women.  
7  
8

9 159 The ORs of the presence of MetS across eating rate are shown in **Table 2**.

10  
11 160 Faster eating was associated with higher presence of MetS in age- and

12  
13  
14  
15 161 multivariable-adjusted models. The trend was more apparent in men than in women.

16  
17 162 The multivariable-adjusted ORs (95% CI) of MetS for eating slow, normal and fast rate

18  
19  
20 163 were 0.70 (0.62 to 0.79), 1.00 (reference) and 1.61 (1.53 to 1.70), respectively, in men

21  
22  
23 164 (P for trend <0.001), and 0.74 (0.60 to 0.91), 1.00 (reference) and 1.27 (1.13 to 1.43),

24  
25  
26 165 respectively, in women (P for trend <0.001). Further adjustment for BMI markedly

27  
28  
29 166 attenuated these associations; however, the association with fast eating and MetS

30  
31  
32 167 remained statistically significant in men.  
33  
34

35 168 **Table 3** shows the ORs of the presence of individual MetS components across

36  
37  
38 169 three categories of eating rate. The ORs of central obesity increased from slow to fast

39  
40  
41 170 eating in both men and women (OR 0.63, 1.00 (reference) and 1.97, respectively, in men

42  
43  
44 171 (P for trend <0.001), and 0.73, 1.00(reference) and 1.44, respectively, in women (P for

45  
46  
47 172 trend <0.001)). High blood pressure and triglyceride were positively associated with

48  
49  
50 173 eating rate in both sexes. High fasting plasma glucose and low HDL-C were associated

51  
52  
53 174 with slow eating in both sexes, but they were associated with fast eating in men only.

54  
55 175 Additional adjustment for BMI largely attenuated these associations, but the  
56  
57  
58  
59  
60

1  
2  
3  
4  
5  
6 176 associations of slow eating with high blood pressure (men and women) and  
7  
8  
9 177 hyperglycemia (men) and those of fast eating with abnormal lipid profile (men)  
10  
11  
12 178 remained statistically significant.

13  
14  
15 179

## 16 17 18 180 **DISCUSSION**

19  
20 181 In this large population of Japanese men and women, we found that eating rate  
21  
22  
23 182 was positively associated with the presence of MetS, especially in men. Of components  
24  
25  
26 183 of MetS, the association with abdominal obesity was strongest. The relationship with  
27  
28  
29 184 blood pressure in both sexes and fasting plasma glucose and lipids in men remained  
30  
31  
32 185 statistically significant even after additional adjustment for BMI. To our best knowledge,  
33  
34  
35 186 the present study is the first to report a positive association between eating rate and  
36  
37  
38 187 MetS defined by using waist circumference.

39  
40  
41 188 The present finding for MetS is consistent with that of a study among Korean  
42  
43  
44 189 men reporting that eating rate was positively associated with MetS, which was defined  
45  
46  
47 190 by using BMI instead of waist circumference.<sup>20</sup> As regards MetS components, our study  
48  
49  
50 191 is compatible with some cross-sectional studies showing that eating rate was associated  
51  
52  
53 192 with higher BMI<sup>8-10</sup> and two longitudinal studies showing that eating rate was  
54  
55  
56 193 associated with weight gain.<sup>16, 17</sup> In a Korean study that elucidated the association  
57  
58  
59  
60

1  
2  
3  
4  
5  
6 194 between eating rate and components of MetS for men and women separately, eating rate  
7  
8  
9 195 was associated with obesity, high blood pressure, hyperglycemia and abnormal lipid  
10  
11  
12 196 profile in men, whereas it was associated with only obesity in women.<sup>11</sup> Our results  
13  
14  
15 197 were largely consistent with those in the Korean study (except for blood pressure in  
16  
17  
18 198 women).

19  
20  
21 199 Notably, we found that the associations of MetS components with eating rate  
22  
23  
24 200 were largely attenuated after adjustment for BMI, a finding compatible with those of a  
25  
26  
27 201 cross-sectional study in Korea<sup>11</sup> and a prospective study in Japan.<sup>18</sup> This result indicates  
28  
29  
30 202 that obesity is a mediator whereby fast eating deteriorates MetS components. We also  
31  
32  
33 203 found, however, that some associations remained statistically significant even after  
34  
35  
36 204 adjusting for BMI (dyslipidemia with fast eating and hyperglycemia with slow eating in  
37  
38  
39 205 men, and high blood pressure with slow eating in both men and women). Similarly, the  
40  
41  
42 206 above-mentioned Korean study<sup>11</sup> reported that high rate of eating remained an important  
43  
44  
45 207 determinant for low HDL-C and high fasting plasma glucose after adjustment for BMI  
46  
47  
48 208 in men. Therefore, there may be pathways other than weight gain that might underlie the  
49  
50  
51 209 association between eating rate and MetS.

52  
53 210 We found that the association between eating rate and MetS was stronger in  
54  
55  
56 211 men than in women, consistent with a previous study in Korea.<sup>11</sup> Such sex difference  
57  
58  
59  
60

1  
2  
3  
4  
5  
6 212 may reflect the difference in actual eating speed between men and women. One study  
7  
8  
9 213 elucidated that women took more bites, smaller bite size and slower bites than men in  
10  
11  
12 214 eating the same amount of doughnut, irrespectively of body size.<sup>26</sup> Another study  
13  
14  
15 215 showed that objectively measured eating speed in men with self-reported slow eating  
16  
17  
18 216 was faster than that in women with self-reported fast eating.<sup>27</sup> Taken together, eating  
19  
20  
21 217 rate may have a greater impact on metabolism in men than that in women.

22  
23 218 Although mechanisms whereby eating rate influences metabolism is not fully  
24  
25  
26 219 elucidated, overeating may link fast eating to MetS. Fast eating gives few satiety signal  
27  
28  
29 220 from oral cavity to the brain,<sup>28, 29</sup> induces less satiation and satiety due to a lack of  
30  
31  
32 221 stomach expansion<sup>30</sup> and alters the circulating levels of certain gut hormones.<sup>31, 32</sup> In  
33  
34  
35 222 these pathways, fast eating leads to excess energy intake,<sup>33, 34</sup> resulting in overweight  
36  
37  
38 223 and MetS. Because fast eating has been associated with obesity even after adjusting for  
39  
40  
41 224 total energy intake,<sup>8-11, 14</sup> there may be other pathways. One study showed that  
42  
43  
44 225 interleukin-1 $\beta$  and interleukin-6 were higher among those who ate fast than among  
45  
46  
47 226 those who ate slowly, even after accounting for energy intake and BMI.<sup>35</sup> These  
48  
49  
50 227 cytokines could induce insulin resistance,<sup>36, 37</sup> contributing to high blood pressure via an  
51  
52  
53 228 increased renal sodium and water retention, plasma noradrenalin and sympathetic  
54  
55  
56 229 nervous system activity.<sup>38-40</sup>

1  
2  
3  
4  
5  
6 230 The strengths of our study deserve mention. The present study has large sample  
7  
8  
9 231 size (56,865 participants). In addition, body weight, body height and waist  
10  
11  
12 232 circumference were measured by trained technicians, which increased the validity of our  
13  
14  
15 233 study. Nonetheless, several limitations in the present study merit consideration. First,  
16  
17  
18 234 eating rate was self-reported. However, self-reported eating rate has been shown to be  
19  
20  
21 235 well correlated with friend-reported one<sup>9</sup> or objectively measured one.<sup>27</sup> Second, total  
22  
23  
24 236 energy intake was not available in our study. However, because energy intake is  
25  
26  
27 237 influenced by eating rate and thus may act as a mediator rather than confounder, the  
28  
29  
30 238 adjustment of energy intake could underestimate the association between eating rate and  
31  
32  
33 239 MetS. Moreover, eating rate has been associated with body weight independent of  
34  
35  
36 240 energy intake.<sup>7-10, 13</sup> Third, the study participants were mainly workers in various  
37  
38  
39 241 industries including manufacturing (43.6%), service (27.8%) and transport and  
40  
41  
42 242 telecommunications (9.9%), and these figures are similar to those of national survey.<sup>41</sup>  
43  
44  
45 243 However, information on profession of participants was not available, and thus caution  
46  
47  
48 244 is required when generalize the present finding. Fourth, cross-sectional design precludes  
49  
50  
51 245 any causal inferences about the role of eating rate. Finally, we cannot exclude a  
52  
53  
54 246 possibility of the effects of residual confounding and confounding by unmeasured  
55  
56  
57 247 variables.  
58  
59  
60

1  
2  
3  
4  
5  
6 248 In conclusion, we found a positive trend association between self-reported  
7  
8  
9 249 eating rate and the presence of MetS in men and women. The association between  
10  
11 250 eating rate and MetS was largely accounted for by the difference of body mass across  
12  
13  
14  
15 251 eating rate. Further research should address whether reducing eating rate prevents  
16  
17  
18 252 obesity and MetS.  
19  
20  
21  
22  
23  
24  
25  
26  
27  
28  
29  
30  
31  
32  
33  
34  
35  
36  
37  
38  
39  
40  
41  
42  
43  
44  
45  
46  
47  
48  
49  
50  
51  
52  
53  
54  
55  
56  
57  
58  
59  
60

Table 1. Characteristics of the study individuals according to eating rates

|                               | Men (n = 41,820) |               |               | P for trend <sup>a</sup> | Women (n = 15,045) |              |              | P for trend <sup>a</sup> |
|-------------------------------|------------------|---------------|---------------|--------------------------|--------------------|--------------|--------------|--------------------------|
|                               | Slow             | Normal        | Fast          |                          | Slow               | Normal       | Fast         |                          |
| n (%)                         | 2,821 (6.8)      | 24,893 (59.5) | 14,106 (33.7) |                          | 1,398 (9.3)        | 9,893 (65.8) | 3,754 (24.9) |                          |
| Age (years) <sup>b</sup>      | 46.9 ± 12.3      | 46.9 ± 10.9   | 45.0 ± 10.4   | <0.001                   | 43.5 ± 12.5        | 47.2 ± 11.6  | 46.7 ± 11.2  | <0.001                   |
| Walking time, ≥60 min/day (%) | 21.8             | 19.0          | 20.6          | 0.004                    | 15.5               | 15.0         | 16.1         | 0.798                    |
| Smoking status (%)            |                  |               |               | <0.001                   |                    |              |              |                          |
| Non-smoker                    | 61.9             | 55.0          | 56.6          |                          | 82.9               | 83.1         | 80.7         | 0.572                    |



|    |                                       |                |                |                |       |                |                |                |
|----|---------------------------------------|----------------|----------------|----------------|-------|----------------|----------------|----------------|
| 1  |                                       |                |                |                |       |                |                |                |
| 2  |                                       |                |                |                |       |                |                |                |
| 3  |                                       |                |                |                |       |                |                |                |
| 4  |                                       |                |                |                |       |                |                |                |
| 5  |                                       |                |                |                |       |                |                |                |
| 6  |                                       |                |                |                |       |                |                |                |
| 7  | Daily consuming <20 cigarettes        |                |                |                |       |                |                |                |
| 8  |                                       | 28.6           | 34.6           | 31.3           |       | 16.0           | 15.7           | 17.6           |
| 9  | /day                                  |                |                |                |       |                |                |                |
| 10 |                                       |                |                |                |       |                |                |                |
| 11 |                                       |                |                |                |       |                |                |                |
| 12 | Daily consuming $\geq$ 20 cigarettes  |                |                |                |       |                |                |                |
| 13 |                                       | 9.5            | 10.4           | 12.1           |       | 1.1            | 1.2            | 1.7            |
| 14 | /day                                  |                |                |                |       |                |                |                |
| 15 |                                       |                |                |                |       |                |                |                |
| 16 |                                       |                |                |                |       |                |                |                |
| 17 |                                       |                |                |                |       |                |                |                |
| 18 | Alcohol (%)                           |                |                |                |       |                |                |                |
| 19 |                                       |                |                |                |       |                |                |                |
| 20 |                                       |                |                |                |       |                |                |                |
| 21 |                                       |                |                |                |       |                |                |                |
| 22 |                                       |                |                |                | <0.00 |                |                | <0.00          |
| 23 | Non-drinker                           | 30.2           | 26.7           | 26.7           |       | 53.4           | 52.2           | 49.8           |
| 24 |                                       |                |                |                |       |                |                |                |
| 25 |                                       |                |                |                | 1     |                |                | 1              |
| 26 |                                       |                |                |                |       |                |                |                |
| 27 | Drinker <1 go /day <sup>d</sup>       | 33.9           | 35.7           | 34.5           |       | 34.2           | 35.9           | 35.5           |
| 28 |                                       |                |                |                |       |                |                |                |
| 29 |                                       |                |                |                |       |                |                |                |
| 30 | Drinker 1 to <2 go /day <sup>d</sup>  | 24.6           | 26.3           | 26.8           |       | 9.5            | 9.5            | 11.5           |
| 31 |                                       |                |                |                |       |                |                |                |
| 32 |                                       |                |                |                |       |                |                |                |
| 33 | Drinker $\geq$ 2 go /day <sup>d</sup> | 11.3           | 11.3           | 12.0           |       | 2.9            | 2.4            | 3.2            |
| 34 |                                       |                |                |                |       |                |                |                |
| 35 |                                       |                |                |                |       |                |                |                |
| 36 | BMI (kg/m <sup>2</sup> ) <sup>b</sup> | 22.4 $\pm$ 3.3 | 23.4 $\pm$ 3.3 | 24.6 $\pm$ 3.7 | <0.00 | 21.0 $\pm$ 3.5 | 21.8 $\pm$ 3.5 | 22.5 $\pm$ 3.8 |
| 37 |                                       |                |                |                |       |                |                | <0.00          |
| 38 |                                       |                |                |                |       |                |                |                |
| 39 |                                       |                |                |                |       |                |                |                |
| 40 |                                       |                |                |                |       |                |                |                |
| 41 |                                       |                |                |                |       |                |                |                |
| 42 |                                       |                |                |                |       |                |                |                |
| 43 |                                       |                |                |                |       |                |                |                |
| 44 |                                       |                |                |                |       |                |                |                |
| 45 |                                       |                |                |                |       |                |                |                |
| 46 |                                       |                |                |                |       |                |                |                |
| 47 |                                       |                |                |                |       |                |                |                |
| 48 |                                       |                |                |                |       |                |                |                |
| 49 |                                       |                |                |                |       |                |                |                |

|                                               |               |               |                 |       |              |              |               |       |
|-----------------------------------------------|---------------|---------------|-----------------|-------|--------------|--------------|---------------|-------|
|                                               |               |               |                 | 1     |              |              |               | 1     |
|                                               |               |               |                 | <0.00 |              |              |               | <0.00 |
| Waist circumference (cm) <sup>b</sup>         | 80.3 ± 9.2    | 82.9 ± 9.0    | 86.0 ± 9.8      |       | 75.5 ± 9.5   | 77.7 ± 9.4   | 79.6 ± 9.8    |       |
|                                               |               |               |                 | 1     |              |              |               | 1     |
|                                               |               |               |                 | <0.00 |              |              |               | <0.00 |
| Systolic blood pressure (mm Hg) <sup>b</sup>  | 123.5 ± 15.5  | 126.1 ± 15.5  | 126.7 ± 15.1    |       | 113.1 ± 16.3 | 117.3 ± 17.2 | 117.0 ± 17.2  |       |
|                                               |               |               |                 | 1     |              |              |               | 1     |
|                                               |               |               |                 | <0.00 |              |              |               | <0.00 |
| Diastolic blood pressure (mm Hg) <sup>b</sup> | 75.2 ± 11.4   | 77.3 ± 11.9   | 78.0 ± 12.0     |       | 69.1 ± 10.9  | 71.4 ± 11.5  | 71.5 ± 11.9   |       |
|                                               |               |               |                 | 1     |              |              |               | 1     |
|                                               |               |               |                 |       | 87 (82 to    | 88 (83 to    |               |       |
| Fasting plasma glucose (mg/dL) <sup>c</sup>   | 91 (85 to 98) | 92 (86 to 99) | 92 (86 to 99)   | 0.001 | 93)          | 94)          | 88 (83 to 94) | 0.001 |
|                                               |               |               |                 |       |              |              |               |       |
|                                               |               |               |                 | <0.00 | 63 (48 to    | 69 (51 to    | 71 (52 to     | <0.00 |
| Triglyceride (mg/dL) <sup>c</sup>             | 92 (65 to     | 99 (69 to     | 107 (73 to 161) |       | 87)          | 96)          | 101)          |       |
|                                               | 138)          | 148)          |                 | 1     |              |              |               | 1     |

1  
2  
3  
4  
5  
6  
7  
8  
9  
10  
11  
12  
13  
14  
15  
16  
17  
18  
19  
20  
21  
22  
23  
24  
25  
26  
27  
28  
29  
30  
31  
32  
33  
34  
35  
36  
37  
38  
39  
40  
41  
42  
43  
44  
45  
46  
47  
48  
49

|                            |             |             |             |       |             |             |             |       |
|----------------------------|-------------|-------------|-------------|-------|-------------|-------------|-------------|-------|
|                            |             |             |             | <0.00 |             |             |             | <0.00 |
| HDL-C (mg/dL) <sup>b</sup> | 61.3 ± 15.3 | 59.4 ± 15.0 | 57.2 ± 14.3 |       | 71.4 ± 15.3 | 70.5 ± 15.8 | 69.3 ± 15.5 |       |
|                            |             |             |             | 1     |             |             |             | 1     |

Cross to sectional survey of 56,865 examinees in All Japan Labor Welfare Foundation, Japan, 2011.

BMI=body mass index; HDL-C=high to density lipoprotein cholesterol.

<sup>a</sup> Linear regression, an extension of the Wilcoxon Rank-Sum test and logistic regression, assigning ordinal number (0 to 2) to eating rate, as appropriate.

<sup>b</sup> Mean ± SD.

<sup>c</sup> medians (interquartile range).

<sup>d</sup> One *go* contains ~25g of ethanol.

Table 2. Odds ratios and 95% confidence intervals for metabolic syndrome according to eating rate (n = 56,865)

| Eating rate          | Men (n = 41,820)    |                     |                     | P for trend <sup>b</sup> | Women (n = 15,045)  |                     |                     | P for trend <sup>b</sup> |
|----------------------|---------------------|---------------------|---------------------|--------------------------|---------------------|---------------------|---------------------|--------------------------|
|                      | Slow                | Normal <sup>a</sup> | Fast                |                          | Slow                | Normal <sup>a</sup> | Fast                |                          |
| n (%)                | 2,821 (6.8)         | 24,893 (59.5)       | 14,106 (33.7)       |                          | 1,398 (9.3)         | 9,893 (65.8)        | 3,754 (24.9)        |                          |
| MetS, n              | 361                 | 4,180               | 3,193               |                          | 116                 | 1,261               | 547                 |                          |
| Model 1 <sup>c</sup> | 0.70 (0.62 to 0.79) | 1.00                | 1.62 (1.53 to 1.71) | <0.001                   | 0.75 (0.61 to 0.92) | 1.00                | 1.27 (1.13 to 1.42) | <0.001                   |
| Model 2 <sup>d</sup> | 0.70 (0.62 to 0.79) | 1.00                | 1.61 (1.53 to 1.70) | <0.001                   | 0.74 (0.60 to 0.91) | 1.00                | 1.27 (1.13 to 1.43) | <0.001                   |

1  
2  
3  
4  
5  
6  
7  
8  
9  
10  
11  
12  
13  
14  
15  
16  
17  
18  
19  
20  
21  
22  
23  
24  
25  
26  
27  
28  
29  
30  
31  
32  
33  
34  
35  
36  
37  
38  
39  
40  
41  
42  
43  
44  
45  
46  
47  
48  
49

|              |               |               |       |               |               |       |
|--------------|---------------|---------------|-------|---------------|---------------|-------|
| Model 3      | 0.91 (0.80 to | 1.10 (1.03 to | <0.00 | 0.88 (0.70 to | 0.98 (0.86 to |       |
|              | 1.04)         | 1.17)         | 1     | 1.11)         | 1.12)         | 0.714 |
| <sup>e</sup> |               |               |       |               |               |       |

MetS as defined using the criteria of the Joint Interim Statement : the presence of three or more of the following risk factors: 1) waist circumference  $\geq 90$  cm in men and  $\geq 80$  cm in women, 2) triglyceride level  $\geq 150$  mg/dL (1.7 mmol/L), 3) HDL-C level  $< 40$  mg/dL (1.04 mmol/L) in men and  $< 50$  mg/dL (1.3 mmol/L) in women, 4) blood pressure  $\geq 130$  mm Hg systolic or  $\geq 85$  mm Hg diastolic, 5) fasting glucose level  $\geq 100$  mg/dL (5.6 mmol/L).

<sup>a</sup> Reference.

<sup>b</sup> Multiple logistic regression, assigning ordinal number (0 to 2) to eating rate.

<sup>c</sup> Adjusted for age.

<sup>d</sup> Adjusted for age, smoking status, alcohol, and regular physical activity.

<sup>e</sup> Adjusted for age, smoking status, alcohol, regular physical activity, and body mass index.

Table 3. Odds ratios and 95% confidence intervals for components of metabolic syndrome according to eating rate (n = 56,865)

| Eating rate                  | Men (n = 41,820)    |                     |                     | P for trend <sup>b</sup> | Women (n = 15,045)  |                     |                     | P for trend <sup>b</sup> |
|------------------------------|---------------------|---------------------|---------------------|--------------------------|---------------------|---------------------|---------------------|--------------------------|
|                              | Slow                | Normal <sup>a</sup> | Fast                |                          | Slow                | Normal <sup>a</sup> | Fast                |                          |
| n (%)                        | 2,821 (6.8)         | 24,893 (59.5)       | 14,106 (33.7)       |                          | 1,398 (9.3)         | 9,893 (65.8)        | 3,754 (24.9)        |                          |
| Central obesity <sup>c</sup> |                     |                     |                     |                          |                     |                     |                     |                          |
| Model 1 <sup>d</sup>         | 0.63 (0.56 to 0.71) | 1.00                | 1.98 (1.89 to 2.08) | <0.001                   | 0.73 (0.64 to 0.83) | 1.00                | 1.44 (1.34 to 1.56) | <0.001                   |
| Model 2 <sup>e</sup>         | 0.63 (0.56 to 0.70) | 1.00                | 1.97 (1.88 to 2.07) | <0.001                   | 0.73 (0.64 to 0.83) | 1.00                | 1.44 (1.33 to 1.56) | <0.001                   |

1  
2  
3  
4  
5  
6  
7  
8  
9  
10  
11  
12  
13  
14  
15  
16  
17  
18  
19  
20  
21  
22  
23  
24  
25  
26  
27  
28  
29  
30  
31  
32  
33  
34  
35  
36  
37  
38  
39  
40  
41  
42  
43  
44  
45  
46  
47  
48  
49

High blood pressure <sup>f</sup>

|                      |                     |      |                     |        |                     |      |                     |        |
|----------------------|---------------------|------|---------------------|--------|---------------------|------|---------------------|--------|
| Model 1 <sup>d</sup> | 0.75 (0.69 to 0.82) | 1.00 | 1.22 (1.17 to 1.27) | <0.001 | 0.76 (0.66 to 0.88) | 1.00 | 1.10 (1.01 to 1.21) | <0.001 |
| Model 2 <sup>e</sup> | 0.74 (0.68 to 0.81) | 1.00 | 1.20 (1.15 to 1.26) | <0.001 | 0.76 (0.65 to 0.88) | 1.00 | 1.10 (1.00 to 1.20) | <0.001 |
| Model 3 <sup>g</sup> | 0.88 (0.81 to 0.96) | 1.00 | 0.97 (0.93 to 1.02) | 0.645  | 0.85 (0.72 to 0.99) | 1.00 | 0.93 (0.84 to 1.02) | 0.923  |

High fasting plasma glucose <sup>h</sup>

|                      |                     |      |                     |        |                     |      |                     |       |
|----------------------|---------------------|------|---------------------|--------|---------------------|------|---------------------|-------|
| Model 1 <sup>d</sup> | 0.78 (0.71 to 0.87) | 1.00 | 1.17 (1.12 to 1.23) | <0.001 | 1.03 (0.85 to 1.25) | 1.00 | 1.17 (1.04 to 1.31) | 0.035 |
| Model 2 <sup>e</sup> | 0.78 (0.71 to 0.87) | 1.00 | 1.16 (1.11 to 1.23) | <0.001 | 1.03 (0.85 to 1.25) | 1.00 | 1.16 (1.03 to 1.31) | 0.042 |

|                                |               |      |               |       |               |      |               |       |
|--------------------------------|---------------|------|---------------|-------|---------------|------|---------------|-------|
|                                | 0.87)         |      | 1.22)         | 1     | 1.25)         |      | 1.31)         |       |
| Model 3 <sup>g</sup>           | 0.88 (0.80 to | 1.00 | 0.99 (0.94 to | 0.238 | 1.14 (0.94 to | 1.00 | 1.02 (0.90 to | 0.536 |
|                                | 0.98)         |      | 1.05)         |       | 1.40)         |      | 1.15)         |       |
| High triglyceride <sup>i</sup> |               |      |               |       |               |      |               |       |
| Model 1 <sup>d</sup>           | 0.88 (0.80 to | 1.00 | 1.32 (1.26 to | <0.00 | 0.83 (0.67 to | 1.00 | 1.14 (1.01 to | 0.002 |
|                                | 0.96)         |      | 1.38)         | 1     | 1.01)         |      | 1.28)         |       |
| Model 2 <sup>e</sup>           | 0.90 (0.82 to | 1.00 | 1.33 (1.27 to | <0.00 | 0.81 (0.66 to | 1.00 | 1.13 (1.01 to | 0.002 |
|                                | 0.98)         |      | 1.39)         | 1     | 1.00)         |      | 1.27)         |       |
| Model 3 <sup>g</sup>           | 1.08 (0.98 to | 1.00 | 1.07 (1.02 to | 0.121 | 0.90 (0.73 to | 1.00 | 0.98 (0.87 to | 0.753 |
|                                | 1.19)         |      | 1.12)         |       | 1.11)         |      | 1.11)         |       |
| Low HDL-C <sup>j</sup>         |               |      |               |       |               |      |               |       |



1  
2  
3  
4  
5  
6  
7  
8  
9  
10  
11  
12  
13  
14  
15  
16  
17  
18  
19  
20  
21  
22  
23  
24  
25  
26  
27  
28  
29  
30  
31  
32  
33  
34  
35  
36  
37  
38  
39  
40  
41  
42  
43  
44  
45  
46  
47  
48  
49

|                      |                     |      |                     |        |                     |      |                     |       |
|----------------------|---------------------|------|---------------------|--------|---------------------|------|---------------------|-------|
| Model 1 <sup>c</sup> | 0.83 (0.73 to 0.96) | 1.00 | 1.34 (1.26 to 1.43) | <0.001 | 0.90 (0.74 to 1.09) | 1.00 | 1.11 (0.99 to 1.25) | 0.018 |
| Model 2 <sup>d</sup> | 0.83 (0.73 to 0.96) | 1.00 | 1.36 (1.28 to 1.45) | <0.001 | 0.89 (0.74 to 1.08) | 1.00 | 1.12 (1.00 to 1.26) | 0.011 |
| Model 3 <sup>e</sup> | 0.97 (0.84 to 1.12) | 1.00 | 1.10 (1.03 to 1.18) | 0.004  | 1.00 (0.82 to 1.22) | 1.00 | 0.96 (0.85 to 1.08) | 0.500 |

BMI=body mass index; HDL-C=high to density lipoprotein cholesterol.

<sup>a</sup> Reference.

<sup>b</sup> Multiple logistic regression, assigning ordinal number (0 to 2) to eating rate.

<sup>c</sup> Waist circumference  $\geq 90$  cm in men,  $\geq 80$  cm in women.

<sup>d</sup> Adjusted for age.

<sup>e</sup> Adjusted for age, smoking status, alcohol, and regular physical activity.

1  
2  
3  
4  
5  
6  
7 <sup>f</sup> Blood pressure  $\geq 130$  mm Hg for systolic or  $\geq 85$  mm Hg for diastolic.  
8

9  
10 <sup>g</sup> Adjusted for age, smoking status, alcohol, regular physical activity and body mass index.  
11

12  
13 <sup>h</sup> Fasting plasma glucose  $\geq 100$  mg/dL or under medication.  
14

15  
16 <sup>i</sup> Triglyceride  $\geq 150$  mg/dL or under medication.  
17

18  
19 <sup>j</sup> HDL-C  $< 40$  mg/dL in men,  $< 50$  mg/dL in women or under medication.  
20  
21  
22  
23  
24  
25  
26  
27  
28  
29  
30  
31  
32  
33  
34  
35  
36  
37  
38  
39  
40  
41  
42  
43  
44  
45  
46  
47  
48  
49

## Acknowledgments

The authors would like to thank Dr. Nobuo Yanagisawa and Dr. Takeshi Kawaguchi for their coordinating the study.

**Contributors:** SN and KKurotani designed study and drafted the manuscript. SN, NMP, AN, KKuwahara performed the data analysis. MD collected and interpreted the data. All authors have participated in the interpretation of the findings, revised it critically for important intellectual content and approved final version to be published. TM and YN provided administrative, technical and material support. SN and TM are guarantors.

**Funding:** This study was supported by the Industrial Health Foundation.

**Competing interests:** All authors have completed the ICMJE uniform disclosure form at [www.icmje.org/coi\\_disclosure.pdf](http://www.icmje.org/coi_disclosure.pdf) and declare: all authors declare no interests.

**Ethical approval:** The research protocol was approved by the Ethics Committee of the National Center for Global Health and Medicine and the Ethics Committee of Toho University.

**Data sharing:** No additional data available.

**Transparency:** SN affirms that the manuscript is an honest, accurate, and transparent account of the study being reported; that no important aspects of the study have been omitted; and that any discrepancies from the study as planned (and, if relevant,

1  
2  
3  
4  
5  
6 registered) have been explained.  
7  
8  
9  
10  
11  
12  
13  
14  
15  
16  
17  
18  
19  
20  
21  
22  
23  
24  
25  
26  
27  
28  
29  
30  
31  
32  
33  
34  
35  
36  
37  
38  
39  
40  
41  
42  
43  
44  
45  
46  
47  
48  
49  
50  
51  
52  
53  
54  
55  
56  
57  
58  
59  
60

For peer review only

## References

1. Eckel RH, Alberti KG, Grundy SM, et al. The metabolic syndrome. *Lancet* 2010;**375**:181-83.
2. Gomez-Martinez S, Martinez-Gomez D, Perez de Heredia F, et al. Eating habits and total and abdominal fat in Spanish adolescents: influence of physical activity. The AVENA study. *J Adolesc Health* 2012;**50**:403-09.
3. Ilanne-Parikka P, Eriksson JG, Lindstrom J, et al. Effect of lifestyle intervention on the occurrence of metabolic syndrome and its components in the Finnish Diabetes Prevention Study. *Diabetes care* 2008;**31**:805-07.
4. Nanri A, Tomita K, Matsushita Y, et al. Effect of six months lifestyle intervention in Japanese men with metabolic syndrome: randomized controlled trial. *J Occup Health* 2012;**54**:215-22.
5. Ferster CB, Nurnberger JI, Levitt EB. The control of eating. 1962. *Obes Res* 1996;**4**:401-10.
6. Hill SW, McCutcheon NB. Eating responses of obese and nonobese humans during dinner meals. *Psychosom Med* 1975;**37**:395-401.
7. Bellack AS. Behavior therapy for weight reduction. *Addict Behav* 1975;**1**:73-82.
8. Otsuka R, Tamakoshi K, Yatsuya H, et al. Eating fast leads to obesity: findings based

1  
2  
3  
4  
5  
6 on self-administered questionnaires among middle-aged Japanese men and women. *J*  
7  
8  
9 *Epidemiol* 2006;**16**:117-24.

10  
11 9. Sasaki S, Katagiri A, Tsuji T, et al. Self-reported rate of eating correlates with body  
12  
13 mass index in 18-y-old Japanese women. *Int J Obes Relat Metab Disord*  
14  
15 2003;**27**:1405-10.  
16  
17

18  
19  
20 10. Maruyama K, Sato S, Ohira T, et al. The joint impact on being overweight of self  
21  
22 reported behaviours of eating quickly and eating until full: cross sectional survey. *BMJ*  
23  
24 2008;**337**:a2002.  
25  
26  
27

28  
29 11. Lee KS, Kim DH, Jang JS, et al. Eating rate is associated with cardiometabolic risk  
30  
31 factors in Korean adults. *Nut Metab Cardiovasc Dis* 2013;**23**:635-41.  
32  
33

34  
35 12. Otsuka R, Tamakoshi K, Yatsuya H, et al. Eating fast leads to insulin resistance:  
36  
37 findings in middle-aged Japanese men and women. *Prev Med* 2008;**46**:154-59.  
38  
39

40  
41 13. Radzeviciene L, Ostrauskas R. Fast eating and the risk of type 2 diabetes mellitus: a  
42  
43 case-control study. *Clin Nutr* 2013;**32**:232-35.  
44  
45

46  
47 14. Ohkuma T, Fujii H, Iwase M, et al. Impact of eating rate on obesity and  
48  
49 cardiovascular risk factors according to glucose tolerance status: the Fukuoka Diabetes  
50  
51 Registry and the Hisayama Study. *Diabetologia* 2013;**56**:70-77.  
52  
53

54  
55 15. Shigeta H, Shigeta M, Nakazawa A, et al. Lifestyle, obesity, and insulin resistance.  
56  
57  
58  
59  
60

1  
2  
3  
4  
5  
6  
7  
8  
9  
10  
11  
12  
13  
14  
15  
16  
17  
18  
19  
20  
21  
22  
23  
24  
25  
26  
27  
28  
29  
30  
31  
32  
33  
34  
35  
36  
37  
38  
39  
40  
41  
42  
43  
44  
45  
46  
47  
48  
49  
50  
51  
52  
53  
54  
55  
56  
57  
58  
59  
60

*Diabetes care* 2001;**24**:608.

16. Gerace TA, George VA. Predictors of weight increases over 7 years in fire fighters and paramedics. *Prev Med* 1996;**25**:593-600.

17. Tanihara S, Imatoh T, Miyazaki M, et al. Retrospective longitudinal study on the relationship between 8-year weight change and current eating speed. *Appetite* 2011;**57**:179-83.

18. Sakurai M, Nakamura K, Miura K, et al. Self-reported speed of eating and 7-year risk of type 2 diabetes mellitus in middle-aged Japanese men. *Metabolism* 2012;**61**:1566-71.

19. Kral JG, Buckley MC, Kissileff HR, et al. Metabolic correlates of eating behavior in severe obesity. *Int J Obes Relat Metab Disord* 2001;**25**:258-64.

20. Shin A, Lim SY, Sung J, et al. Dietary intake, eating habits, and metabolic syndrome in Korean men. *J Am Diet Assoc* 2009;**109**:633-40.

21. Shen W, Punyanitya M, Chen J, et al. Waist circumference correlates with metabolic syndrome indicators better than percentage fat. *Obesity (Silver Spring)* 2006;**14**:727-36.

22. Alberti KG, Eckel RH, Grundy SM, et al. Harmonizing the metabolic syndrome: a joint interim statement of the International Diabetes Federation Task Force on Epidemiology and Prevention; National Heart, Lung, and Blood Institute; American

1  
2  
3  
4  
5  
6 Heart Association; World Heart Federation; International Atherosclerosis Society; and  
7  
8  
9 International Association for the Study of Obesity. *Circulation* 2009;**120**:1640-5.

10  
11  
12 23. Ministry of Justice, Japan. Industrial Safty and Health Act, Article 66 (Medical  
13  
14 Examination). Available at:

15  
16  
17 <http://www.japaneselawtranslation.go.jp/law/detail/?id=1926&vm=&re=>. Accessed 26  
18  
19  
20 May 2014.

21  
22  
23 24. Ministry of Health, Labour and Welfare. Specific Health Checkups and Specific  
24  
25 Health Guidance. Secondary Specific Health Checkups and Specific Health Guidance.

26  
27 Available at: <http://www.mhlw.go.jp/english/wp/wp-hw3/dl/2-007.pdf>. Accessed 26  
28  
29  
30 May 2014.

31  
32  
33 25. Ministry of Health, Labour and Welfare. Questionnaire of Specific Health Checkups.  
34  
35  
36  
37  
38  
39  
40  
41  
42  
43  
44  
45  
46  
47  
48  
49  
50  
51  
52  
53  
54  
55  
56  
57  
58  
59  
60  
Secondary Questionnaire of Specific Health Checkups. Available at:

[http://www.mhlw.go.jp/seisakunitsuite/bunya/kenkou\\_iryuu/kenkou/seikatsu/dl/hoken-program2\\_02.pdf](http://www.mhlw.go.jp/seisakunitsuite/bunya/kenkou_iryuu/kenkou/seikatsu/dl/hoken-program2_02.pdf). Accessed 26 May 2014. (in Japanese)

26. Hill SW, McCutcheon NB. Contributions of obesity, gender, hunger, food preference, and body size to bite size, bite speed, and rate of eating. *Appetite* 1984;**5**:73-83.

27. Ekuni D, Furuta M, Takeuchi N, et al. Self-reports of eating quickly are related to a decreased number of chews until first swallow, total number of chews, and total



1  
2  
3  
4  
5  
6 duration of chewing in young people. *Arch Oral Biol* 2012;**57**:981-86.  
7

8  
9 28. Rolls ET. Sensory processing in the brain related to the control of food intake. *Proc*  
10  
11  
12 *Nutr Soc* 2007;**66**:96-112.  
13

14  
15 29. Morton GJ, Cummings DE, Baskin DG, et al. Central nervous system control of  
16  
17  
18 food intake and body weight. *Nature* 2006;**443**:289-95.  
19

20  
21 30. de Graaf C, Blom WA, Smeets PA, et al. Biomarkers of satiation and satiety. *Am J*  
22  
23  
24 *Clin Nutr* 2004;**79**:946-61.  
25

26  
27 31. Kokkinos A, le Roux CW, Alexiadou K, et al. Eating slowly increases the  
28  
29  
30 postprandial response of the anorexigenic gut hormones, peptide YY and glucagon-like  
31  
32  
33 peptide-1. *J Clin Endocrinol Metab* 2010;**95**:333-37.  
34

35  
36 32. Sobki SH, Zaid AA, Khan HA, et al. Significant impact of pace of eating on serum  
37  
38  
39 ghrelin and glucose levels. *Clin Biochem* 2010;**43**:522-24.  
40

41  
42 33. Viskaal-van Dongen M, Kok FJ, de Graaf C. Eating rate of commonly consumed  
43  
44  
45 foods promotes food and energy intake. *Appetite* 2011;**56**:25-31.  
46

47  
48 34. Scisco JL, Muth ER, Dong Y, et al. Slowing bite-rate reduces energy intake: an  
49  
50  
51 application of the bite counter device. *J Am Diet Assoc* 2011;**111**:1231-35.  
52

53  
54 35. Mochizuki K, Misaki Y, Miyauchi R, et al. A higher rate of eating is associated with  
55  
56  
57 higher circulating interleukin-1beta concentrations in Japanese men not being treated for  
58  
59  
60

1  
2  
3  
4  
5  
6 metabolic diseases. *Nutrition* 2012;**28**:978-83.

7  
8  
9 36. Besedovsky H, del Rey A, Sorkin E, et al. Immunoregulatory feedback between  
10  
11 interleukin-1 and glucocorticoid hormones. *Science* 1986;**233**:652-54

12  
13  
14 37. Matsuki T, Horai R, Sudo K, et al. IL-1 plays an important role in lipid metabolism  
15  
16 by regulating insulin levels under physiological conditions. *J Exp Med*  
17  
18 2003;**198**:877-88.  
19  
20  
21  
22

23  
24 38. Yatabe MS, Yatabe J, Yoneda M, et al. Salt sensitivity is associated with insulin  
25  
26 resistance, sympathetic overactivity, and decreased suppression of circulating renin  
27  
28 activity in lean patients with essential hypertension. *Am J Clin Nutr* 2010;**92**:77-82.  
29  
30  
31

32  
33 39. Facchini FS, DoNascimento C, Reaven GM, et al. Blood pressure, sodium intake,  
34  
35 insulin resistance, and urinary nitrate excretion. *Hypertension* 1999;**33**:1008-12.  
36  
37

38  
39 40. Pollare T, Lithell H, Berne C. Insulin resistance is a characteristic feature of primary  
40  
41 hypertension independent of obesity. *Metabolism*. 1990;**39**:167-74.  
42  
43

44  
45 41. Ministry of Health, Labour and Welfare. Special Survey on Industrial Safety and  
46  
47 Health. Available at: <http://www.mhlw.go.jp/bunya/roudoukijun/anzeneisei11/h23.html>.

48  
49 Accessed 26 May 2014. (in Japanese)  
50  
51  
52  
53  
54  
55  
56  
57  
58  
59  
60

1  
2  
3  
4  
5  
6 1 **Self-reported** eating rate and metabolic syndrome in Japanese: **cross-sectional**  
7  
8  
9 2 **study**

10  
11  
12 3  
13  
14 4 Satsue Nagahama <sup>1 2 3\*</sup>, Kayo Kurotani <sup>1</sup>, Ngoc Minh Pham <sup>4</sup>, Akiko Nanri <sup>1</sup>, Keisuke  
15  
16  
17 5 Kuwahara <sup>1</sup>, Masashi Dan <sup>2</sup>, Yuji Nishiwaki <sup>3</sup>, Tetsuya Mizoue <sup>1</sup>  
18  
19  
20  
21 6

22  
23 7 <sup>1</sup> Department of Epidemiology and Prevention, Center for Clinical Sciences, National  
24  
25 8 Center for Global Health and Medicine, 1-21-1, Toyama, Shinjuku-ku, Tokyo, Japan,  
26  
27 9 Zip162-8655; Tel +81-3-3202-7181, Fax 81-3-3202-7364,  
28  
29  
30

31  
32 10 E-mail: [satsue\\_0323@hotmail.com](mailto:satsue_0323@hotmail.com)  
33  
34

35 11 <sup>2</sup> All Japan Labor Welfare Foundation, Tokyo, Japan;  
36  
37

38 12 <sup>3</sup> Department of Environmental and Occupational Health, School of Medicine, Toho  
39  
40 13 University, Tokyo, Japan;  
41  
42

43 14 <sup>4</sup> Department of Epidemiology, Faculty of Public Health, Thai Nguyen University of  
44  
45 46 Medicine and Pharmacy, Thai Nguyen Province, Vietnam;  
47  
48  
49

50 16

51  
52 17 Keywords: eating rate, metabolic syndrome, health checkup, Japan, **Joint Interim**  
53  
54

55 18 **Statement**  
56  
57  
58  
59  
60

1  
2  
3  
4  
5  
6 19 Word count: 2373  
7  
8  
9  
10  
11  
12  
13  
14  
15  
16  
17  
18  
19  
20  
21  
22  
23  
24  
25  
26  
27  
28  
29  
30  
31  
32  
33  
34  
35  
36  
37  
38  
39  
40  
41  
42  
43  
44  
45  
46  
47  
48  
49  
50  
51  
52  
53  
54  
55  
56  
57  
58  
59  
60

For peer review only

1  
2  
3  
4  
5  
6 20 **ABSTRACT**  
7

8  
9 21 **Objectives:** To examine the association between self-reported eating rate and metabolic  
10  
11  
12 22 syndrome.

13  
14  
15 23 **Design:** Cross-sectional study.

16  
17  
18 24 **Setting:** Annual health checkup at a health check service center in Japan.

19  
20  
21 25 **Participants:** A total of 56,865 participants (41,820 males and 15,045 females) who  
22  
23  
24 26 attended health checkup in 2011 and reported not to have a history of coronary heart  
25  
26  
27 27 disease or stroke.

28  
29 28 **Main outcome measure:** Metabolic syndrome was defined by the joint of interim  
30  
31  
32 29 statement of the International Diabetes Federation and the American Heart  
33  
34  
35 30 Association/National Heart, Lung, and Blood Institute.

36  
37  
38 31 **Results:** In multiple logistic regression models, eating rate was significantly and  
39  
40  
41 32 positively associated with metabolic syndrome. The multivariable-adjusted odds ratios  
42  
43  
44 33 (95% confidence interval) for slow, normal and fast were 0.70 (0.62 to 0.79), 1.00  
45  
46  
47 34 (reference) and 1.61 (1.53 to 1.70), respectively, in men (P for trend <0.001), and 0.74  
48  
49  
50 35 (0.60 to 0.91), 1.00 (reference) and 1.27 (1.13 to 1.43), respectively, in women (P for  
51  
52  
53 36 trend <0.001). The association of eating rate and metabolic syndrome was attenuated  
54  
55  
56 37 after further adjustment for body mass index in both sexes, but remained statistically

1  
2  
3  
4  
5  
6 38 significant in men. Of metabolic syndrome components, abdominal obesity showed the  
7  
8  
9 39 strongest association with eating rate. The associations of slow eating with high blood  
10  
11  
12 40 pressure and hyperglycemia and that of fast eating with lipid abnormality were still  
13  
14  
15 41 significant in men, even after adjustment for body mass index.  
16

17  
18 42 **Conclusions:** Results suggest that eating rate is associated with the presence of  
19  
20  
21 43 metabolic syndrome and that this association is largely accounted for by the difference  
22  
23  
24 44 of body mass according to eating rate.  
25  
26  
27  
28  
29  
30  
31  
32  
33  
34  
35  
36  
37  
38  
39  
40  
41  
42  
43  
44  
45  
46  
47  
48  
49  
50  
51  
52  
53  
54  
55  
56  
57  
58  
59  
60

1  
2  
3  
4  
5  
6 45 **Strength and Limitation**  
7

8  
9 46 This study included a large number of participants, used waist circumference in defining  
10  
11  
12 47 metabolic syndrome, and analyzed data for men and women separately.  
13

14  
15 48 Eating rate was assessed by a self-reported questionnaire. Information on dietary intake  
16  
17  
18 49 was not obtained.  
19  
20  
21  
22  
23  
24  
25  
26  
27  
28  
29  
30  
31  
32  
33  
34  
35  
36  
37  
38  
39  
40  
41  
42  
43  
44  
45  
46  
47  
48  
49  
50  
51  
52  
53  
54  
55  
56  
57  
58  
59  
60

1  
2  
3  
4  
5  
6 **50 Introduction**  
7

8  
9 51 Metabolic syndrome (MetS) is a cluster of physiological risk factors associated  
10  
11 52 with cardiovascular disease and several types of cancer.<sup>1</sup> Determination of etiologic  
12  
13 53 factors for MetS is required for the establishment of public health strategies to reduce its  
14  
15 54 prevalence and prevent resulting complications. Growing evidence from both  
16  
17 55 observational and interventional studies suggests a role of dietary habits in the  
18  
19 56 development of MetS,<sup>2-4</sup> which originates from obesity. Obesity has been extensively  
20  
21 57 investigated in relation to dietary habits including eating rate since 1962, when Ferster  
22  
23 58 published a theoretical and practical weight control program focusing on eating  
24  
25 59 behaviors including eating rate.<sup>5</sup> Observational studies showed that obese people ate at a  
26  
27 60 faster rate than non-obese people,<sup>6</sup> and reducing eating rate may be a simple and  
28  
29 61 effective therapy for obesity.<sup>7</sup>  
30  
31  
32  
33  
34  
35  
36  
37  
38  
39  
40

41 62 During the past decade, several cross-sectional studies have found a positive  
42  
43 63 association between eating rate and overweight<sup>8-11</sup> or insulin resistance.<sup>11-15</sup> Similarly, a  
44  
45 64 few longitudinal studies showed that eating fast was associated with an increased risk of  
46  
47 65 weight gain<sup>16, 17</sup> and type 2 diabetes.<sup>18</sup> In addition, some cross-sectional studies have  
48  
49 66 reported that fast eating was positively associated with hypertriglyceridemia and low  
50  
51 67 high-density lipoprotein cholesterol (HDL-C).<sup>11, 14, 19</sup> Therefore it is conceivable that  
52  
53  
54  
55  
56  
57  
58  
59  
60



1  
2  
3  
4  
5  
6 68 eating rate may be associated with MetS. To our knowledge, however, only one Korean  
7  
8  
9 69 study cross-sectionally examined eating rate in relation to MetS.<sup>20</sup> In that study, MetS  
10  
11  
12 70 was defined by using body mass index (BMI), rather than waist circumference, and  
13  
14  
15 71 investigated the association in men only. Waist circumference is a component of most  
16  
17  
18 72 MetS definitions as a surrogate of central obesity, which can better predict  
19  
20  
21 73 cardiovascular risk.<sup>21</sup> It is therefore necessary to examine the relationship between  
22  
23  
24 74 eating rate and MetS using waist circumference in both sexes. Here, we investigated  
25  
26  
27 75 cross-sectionally the association between self-reported eating rate and the presence of  
28  
29  
30 76 MetS according to the joint of interim statement of the International Diabetes Federation  
31  
32 77 and the American Heart Association/National Heart, Lung, and Blood Institute (JIS)<sup>22</sup>  
33  
34  
35 78 using a large dataset of health checkup in Japanese men and women.  
36  
37  
38  
39  
40

## 41 **METHODS AND PROCEDURES**

### 42 43 44 **Study population**

45  
46 82 In Japan, health checkup under occupational health and safety law is mandatory  
47  
48  
49 83 for all employed workers<sup>23</sup> and has been modified in 2008 when the recommendation  
50  
51  
52 84 for new national health checkup system focusing on MetS has been launched.<sup>24</sup> Study  
53  
54  
55 85 participants were attendants of 2011 (calendar year) annual health checkup at All Japan  
56  
57  
58  
59  
60

1  
2  
3  
4  
5  
6 86 Labor Welfare Foundation (Tokyo), a health service center performing health checkup.  
7  
8  
9 87 Participants were mainly Japanese employees but also included a small number of their  
10  
11  
12 88 dependents and foreign workers, aged 17-99 in men and 17-85 in women. Of 297,148  
13  
14  
15 89 participants, we excluded 3,660 with a history of myocardial infarction, coronary heart  
16  
17  
18 90 disease or stroke, 24,452 with missing information on eating rate, 192,581 who took  
19  
20  
21 91 meal within 8 hours or provided no information on meal time, 204,423 with missing  
22  
23  
24 92 data for any of the components of MetS, 15,886 with missing information on covariates  
25  
26  
27 93 (BMI, smoking status, alcohol consumption and physical activity). Some participants  
28  
29  
30 94 met more than one of these exclusion criteria, leaving 56,865 participants (41,820 males  
31  
32 95 and 15,045 females) for analysis. We did not obtain written informed consent from each  
33  
34  
35 96 participant; instead, we disclosed the execution of the study by showing posters, giving  
36  
37  
38 97 participants an opportunity to refuse the use of their data for the study. This procedure  
39  
40  
41 98 conforms to the Japanese Ethical Guidelines for Epidemiological Research. The  
42  
43  
44 99 research protocol was approved by the Ethics Committee of the National Center for  
45  
46  
47 100 Global Health and Medicine and the Ethics Committee of Toho University.

#### 101 **Data collection and measurements**

102 A self-administered questionnaire, which was recommended for specific health  
103 examination by the Japanese government (Ministry of Health, Labour and Welfare),<sup>25</sup>

1  
2  
3  
4  
5  
6 104 was used to assess eating rate, medical history and health-related lifestyles including  
7  
8  
9 105 smoking, alcohol consumption and regular physical activity. Eating rate was assessed by  
10  
11  
12 106 asking “How fast is your speed of eating?”, with three response options (slow, normal  
13  
14  
15 107 and fast). A trained staff measured height to the nearest 0.1 cm, weight to the nearest 0.1  
16  
17  
18 108 kg and waist circumference to the nearest 0.1 cm at the umbilical level in a standing  
19  
20  
21 109 position. BMI was calculated as the weight in kilograms divided by the squared height  
22  
23  
24 110 in meters. Blood pressure in the sitting position was measured using an automated  
25  
26  
27 111 machine (HEM-907, Omron, Kyoto, Japan). Participants with high blood pressure  
28  
29  
30 112 ( $\geq 130$  mm Hg systolic or  $\geq 85$  mm Hg diastolic) received another measurement and data  
31  
32  
33 113 showing lower systolic blood pressure was used. Venous blood sample was collected,  
34  
35  
36 114 stored in a cooler at 4 degrees for transportation to an external laboratory (SRL, Tokyo,  
37  
38  
39 115 Japan) and measured within 24 hours of blood drawing. Triglyceride level was  
40  
41  
42 116 measured by enzymatic colorimetric test (Bio Majesty JCA-BM8060, JEOL, Tokyo,  
43  
44  
45 117 Japan). HDL-C level was determined by a direct method (Bio Majesty JCA-BM8060,  
46  
47  
48 118 JEOL, Tokyo, Japan). Plasma glucose levels were determined using by the hexokinase  
49  
50  
51 119 method (an automatic clinical chemistry analyzer JCA-BM9000 series, JEOL, Tokyo,  
52  
53  
54 120 Japan).

55 121 **Definitions for MetS**  
56  
57  
58  
59  
60

1  
2  
3  
4  
5  
6 122 According to the JIS criteria, MetS was defined as three or more of the  
7  
8  
9 123 following risk factors: 1) waist circumference for Asian population  $\geq 90$  cm in men and  
10  
11  
12 124  $\geq 80$  cm in women, 2) triglyceride level  $\geq 150$  mg/dL (1.7 mmol/L), 3) HDL-C level  $< 40$   
13  
14  
15 125 mg/dL (1.04 mmol/L) in men and  $< 50$  mg/dL (1.3 mmol/L) in women, 4) blood  
16  
17  
18 126 pressure  $\geq 130$  mm Hg systolic or  $\geq 85$  mm Hg diastolic, 5) fasting glucose level  $\geq 100$   
19  
20  
21 127 mg/dL (5.6 mmol/L).<sup>22</sup> Participants under medication for diabetes, hypertension and  
22  
23  
24 128 dyslipidemia were considered as having respective factor, irrespective of measured data.

### 129 **Statistical analysis**

130 Participants were divided into three groups according to eating rate (slow,  
131 normal and fast). The characteristics of participants across eating rate categories were  
132 expressed as means (standard deviation) for continuous variables and percentages for  
133 categorical variables, respectively. Fasting plasma glucose and triglyceride were  
134 expressed as medians (interquartile range) due to their skewed distribution. Trend  
135 association was assessed by assigning ordinal numbers (0 to 2) to the categories of  
136 eating rate (slow, normal and fast, respectively) and was tested using linear regression,  
137 an extension of the Wilcoxon Rank-Sum test and logistic regression, as appropriate.  
138 Multiple logistic regression analysis was used to estimate the odds ratios (OR) with  
139 95% confidence intervals (CI) for the presence of MetS across eating rate categories,

1  
2  
3  
4  
5  
6 140 with normal eating rate as the reference. We adjusted for age (continuous, year) in the  
7  
8  
9 141 basic model. In the second model, we further adjusted for smoking status (non-smoker,  
10  
11  
12 142 daily smoker consuming <20 cigarettes per day or  $\geq 20$  cigarettes per day), physical  
13  
14  
15 143 activity (walking time <60 min per day or  $\geq 60$  min per day), and alcohol consumption  
16  
17  
18 144 (non-drinker, <1 go, 1 to <2 go or  $\geq 2$  go per day; one go of sake, Japanese traditional  
19  
20  
21 145 beverage, is about 180 ml of 10 to 14% of ethanol and contains ~23g of ethanol). In the  
22  
23  
24 146 third model, we added BMI (continuous, kg/m<sup>2</sup>) to the second model. We performed  
25  
26  
27 147 likelihood ratio test for testing the interaction between eating rate and sex. All analyses  
28  
29  
30 148 were done for men and women separately because the interaction was significant (P for  
31  
32  
33 149 interaction <0.001). We repeated the above analyses for each component of MetS.  
34  
35  
36 150 Two-tailed P value <0.05 was considered statistically significant. All statistical analyses  
37  
38  
39 151 were performed with STATA, version 12.1 (StataCorp, College Station, TX, USA).  
40  
41  
42 152

## 43 153 RESULTS

44  
45  
46 154 The prevalence of MetS was 18.5% in men and 12.9% in women. **Table 1**  
47  
48  
49 155 shows characteristics of the study participants across categories of eating rate. Men who  
50  
51  
52 156 ate fast tended to be young, whereas women who ate slowly tended to be young. Those  
53  
54  
55 157 who ate fast had significantly higher BMI, waist circumference, triglyceride level and  
56  
57  
58  
59  
60

1  
2  
3  
4  
5  
6 158 systolic and diastolic blood pressures and lower HDL-C level in both men and women.  
7  
8

9 159 The ORs of the **presence** of MetS across eating rate are shown in **Table 2**.

10  
11  
12 160 Faster eating was associated with higher **presence** of MetS in age- and

13  
14  
15 161 multivariable-adjusted models. The trend was more apparent in men than in women.

16  
17  
18 162 The multivariable-adjusted ORs (95% CI) of MetS for eating slow, normal and fast rate

19  
20  
21 163 were 0.70 (0.62 to 0.79), 1.00 (reference) and 1.61 (1.53 to 1.70), respectively, in men

22  
23  
24 164 (P for trend <0.001), and 0.74 (0.60 to 0.91), 1.00 (reference) and 1.27 (1.13 to 1.43),

25  
26  
27 165 respectively, in women (P for trend <0.001). Further adjustment for BMI markedly

28  
29  
30 166 attenuated these associations; however, the association with fast eating and MetS

31  
32  
33 167 remained statistically significant in men.  
34

35 168 **Table 3** shows the ORs of the **presence** of individual MetS components across

36  
37  
38 169 three categories of eating rate. **The ORs of central obesity increased from slow to fast**

39  
40  
41 170 eating in both men and women (OR 0.63, 1.00 (reference) and 1.97, respectively, in men

42  
43  
44 171 (P for trend <0.001), and 0.73, 1.00(reference) and 1.44, respectively, in women (P for

45  
46  
47 172 trend <0.001)). High blood pressure and **triglyceride** were positively associated with

48  
49  
50 173 eating rate in both sexes. **High fasting plasma glucose and low HDL-C were associated**

51  
52  
53 174 **with slow eating in both sexes, but they were associated with fast eating in men only.**

54  
55  
56 175 Additional adjustment for BMI largely attenuated these associations, but the  
57  
58  
59  
60

1  
2  
3  
4  
5  
6 176 associations of slow eating with high blood pressure (men and women) and  
7  
8  
9 177 hyperglycemia (men) and those of fast eating with abnormal lipid profile (men)  
10  
11  
12 178 remained statistically significant.

13  
14  
15 179

## 16 17 18 180 **DISCUSSION**

19  
20 181 In this large population of Japanese men and women, we found that eating rate  
21  
22  
23 182 was positively associated with the presence of MetS, especially in men. Of components  
24  
25  
26 183 of MetS, the association with abdominal obesity was strongest. The relationship with  
27  
28  
29 184 blood pressure in both sexes and fasting plasma glucose and lipids in men remained  
30  
31  
32 185 statistically significant even after additional adjustment for BMI. To our best knowledge,  
33  
34  
35 186 the present study is the first to report a positive association between eating rate and  
36  
37  
38 187 MetS defined by using waist circumference.

39  
40  
41 188 The present finding for MetS is consistent with that of a study among Korean  
42  
43  
44 189 men reporting that eating rate was positively associated with MetS, which was defined  
45  
46  
47 190 by using BMI instead of waist circumference.<sup>20</sup> As regards MetS components, our study  
48  
49  
50 191 is compatible with some cross-sectional studies showing that eating rate was associated  
51  
52  
53 192 with higher BMI<sup>8-10</sup> and two longitudinal studies showing that eating rate was  
54  
55  
56 193 associated with weight gain.<sup>16, 17</sup> In a Korean study that elucidated the association  
57  
58  
59  
60

1  
2  
3  
4  
5  
6 194 between eating rate and components of MetS for men and women separately, eating rate  
7  
8  
9 195 was associated with obesity, high blood pressure, hyperglycemia and abnormal lipid  
10  
11  
12 196 profile in men, whereas it was associated with only obesity in women.<sup>11</sup> Our results  
13  
14  
15 197 were largely consistent with those in the Korean study (except for blood pressure in  
16  
17  
18 198 women).

19 199 Notably, we found that the associations of MetS components with eating rate  
20  
21  
22  
23 200 were largely attenuated after adjustment for BMI, a finding compatible with those of a  
24  
25  
26 201 cross-sectional study in Korea<sup>11</sup> and a prospective study in Japan.<sup>18</sup> This result indicates  
27  
28  
29 202 that obesity is a mediator whereby fast eating deteriorates MetS components. We also  
30  
31  
32 203 found, however, that some associations remained statistically significant even after  
33  
34  
35 204 adjusting for BMI (dyslipidemia with fast eating and hyperglycemia with slow eating in  
36  
37  
38 205 men, and high blood pressure with slow eating in both men and women). Similarly, the  
39  
40  
41 206 above-mentioned Korean study<sup>11</sup> reported that high rate of eating remained an important  
42  
43  
44 207 determinant for low HDL-C and high fasting plasma glucose after adjustment for BMI  
45  
46  
47 208 in men. Therefore, there may be pathways other than weight gain that might underlie the  
48  
49  
50 209 association between eating rate and MetS.

51  
52  
53 210 We found that the association between eating rate and MetS was stronger in  
54  
55  
56 211 men than in women, consistent with a previous study in Korea.<sup>11</sup> Such sex difference  
57  
58  
59  
60



1  
2  
3  
4  
5  
6 212 may reflect the difference in actual eating speed between men and women. One study  
7  
8  
9 213 elucidated that women took more bites, smaller bite size and slower bites than men in  
10  
11  
12 214 eating the same amount of doughnut, irrespectively of body size.<sup>26</sup> Another study  
13  
14  
15 215 showed that objectively measured eating speed in men with self-reported slow eating  
16  
17  
18 216 was faster than that in women with self-reported fast eating.<sup>27</sup> Taken together, eating  
19  
20  
21 217 rate may have a greater impact on metabolism in men than that in women.

22  
23 218 Although mechanisms whereby eating rate influences metabolism is not fully  
24  
25  
26 219 elucidated, overeating may link fast eating to MetS. Fast eating gives few satiety signal  
27  
28  
29 220 from oral cavity to the brain,<sup>28, 29</sup> induces less satiation and satiety due to a lack of  
30  
31  
32 221 stomach expansion<sup>30</sup> and alters the circulating levels of certain gut hormones.<sup>31, 32</sup> In  
33  
34  
35 222 these pathways, fast eating leads to excess energy intake,<sup>33, 34</sup> resulting in overweight  
36  
37  
38 223 and MetS. Because fast eating has been associated with obesity even after adjusting for  
39  
40  
41 224 total energy intake,<sup>8-11, 14</sup> there may be other pathways. One study showed that  
42  
43  
44 225 interleukin-1 $\beta$  and interleukin-6 were higher among those who ate fast than among  
45  
46  
47 226 those who ate slowly, even after accounting for energy intake and BMI.<sup>35</sup> These  
48  
49  
50 227 cytokines could induce insulin resistance,<sup>36, 37</sup> contributing to high blood pressure via an  
51  
52  
53 228 increased renal sodium and water retention, plasma noradrenalin and sympathetic  
54  
55  
56 229 nervous system activity.<sup>38-40</sup>

1  
2  
3  
4  
5  
6 230 The strengths of our study deserve mention. The present study has large sample  
7  
8  
9 231 size (56,865 participants). In addition, body weight, body height and waist  
10  
11  
12 232 circumference were measured by trained technicians, which increased the validity of our  
13  
14  
15 233 study. Nonetheless, several limitations in the present study merit consideration. First,  
16  
17  
18 234 eating rate was self-reported. However, self-reported eating rate has been shown to be  
19  
20  
21 235 well correlated with friend-reported one<sup>9</sup> or objectively measured one.<sup>27</sup> Second, total  
22  
23  
24 236 energy intake was not available in our study. However, because energy intake is  
25  
26  
27 237 influenced by eating rate and thus may act as a mediator rather than confounder, the  
28  
29  
30 238 adjustment of energy intake could underestimate the association between eating rate and  
31  
32  
33 239 MetS. Moreover, eating rate has been associated with body weight independent of  
34  
35  
36 240 energy intake.<sup>7-10, 13</sup> Third, the study participants were mainly workers in various  
37  
38  
39 241 industries including manufacturing (43.6%), service (27.8%) and transport and  
40  
41  
42 242 telecommunications (9.9%), and these figures are similar to those of national survey.<sup>41</sup>  
43  
44  
45 243 However, information on profession of participants was not available, and thus caution  
46  
47  
48 244 is required when generalize the present finding. Fourth, cross-sectional design precludes  
49  
50  
51 245 any causal inferences about the role of eating rate. Finally, we cannot exclude a  
52  
53  
54 246 possibility of the effects of residual confounding and confounding by unmeasured  
55  
56  
57 247 variables.  
58  
59  
60

1  
2  
3  
4  
5  
6 248 In conclusion, we found a positive trend association between self-reported  
7  
8  
9 249 eating rate and the presence of MetS in men and women. The association between  
10  
11 250 eating rate and MetS was largely accounted for by the difference of body mass across  
12  
13  
14  
15 251 eating rate. Further research should address whether reducing eating rate prevents  
16  
17  
18 252 obesity and MetS.  
19  
20  
21  
22  
23  
24  
25  
26  
27  
28  
29  
30  
31  
32  
33  
34  
35  
36  
37  
38  
39  
40  
41  
42  
43  
44  
45  
46  
47  
48  
49  
50  
51  
52  
53  
54  
55  
56  
57  
58  
59  
60

Table 1. Characteristics of the study individuals according to eating rates

|                               | Men (n = 41,820) |               |               | P for trend <sup>a</sup> | Women (n = 15,045) |              |              | P for trend <sup>a</sup> |
|-------------------------------|------------------|---------------|---------------|--------------------------|--------------------|--------------|--------------|--------------------------|
|                               | Slow             | Normal        | Fast          |                          | Slow               | Normal       | Fast         |                          |
| n (%)                         | 2,821 (6.8)      | 24,893 (59.5) | 14,106 (33.7) |                          | 1,398 (9.3)        | 9,893 (65.8) | 3,754 (24.9) |                          |
| Age (years) <sup>b</sup>      | 46.9 ± 12.3      | 46.9 ± 10.9   | 45.0 ± 10.4   | <0.001                   | 43.5 ± 12.5        | 47.2 ± 11.6  | 46.7 ± 11.2  | <0.001                   |
| Walking time, ≥60 min/day (%) | 21.8             | 19.0          | 20.6          | 0.004                    | 15.5               | 15.0         | 16.1         | 0.798                    |
| Smoking status (%)            |                  |               |               | <0.001                   |                    |              |              |                          |
| Non-smoker                    | 61.9             | 55.0          | 56.6          |                          | 82.9               | 83.1         | 80.7         | 0.572                    |

1  
2  
3  
4  
5  
6  
7  
8  
9  
10  
11  
12  
13  
14  
15  
16  
17  
18  
19  
20  
21  
22  
23  
24  
25  
26  
27  
28  
29  
30  
31  
32  
33  
34  
35  
36  
37  
38  
39  
40  
41  
42  
43  
44  
45  
46  
47  
48  
49

|                                       |            |            |            |       |            |            |            |       |
|---------------------------------------|------------|------------|------------|-------|------------|------------|------------|-------|
| Daily consuming <20 cigarettes        | 28.6       | 34.6       | 31.3       |       | 16.0       | 15.7       | 17.6       |       |
| /day                                  |            |            |            |       |            |            |            |       |
| Daily consuming ≥20 cigarettes        | 9.5        | 10.4       | 12.1       |       | 1.1        | 1.2        | 1.7        |       |
| /day                                  |            |            |            |       |            |            |            |       |
| Alcohol (%)                           |            |            |            |       |            |            |            |       |
|                                       |            |            |            | <0.00 |            |            |            | <0.00 |
| Non-drinker                           | 30.2       | 26.7       | 26.7       |       | 53.4       | 52.2       | 49.8       |       |
|                                       |            |            |            | 1     |            |            |            | 1     |
| Drinker <1 go /day <sup>d</sup>       | 33.9       | 35.7       | 34.5       |       | 34.2       | 35.9       | 35.5       |       |
| Drinker 1 to <2 go /day <sup>d</sup>  | 24.6       | 26.3       | 26.8       |       | 9.5        | 9.5        | 11.5       |       |
| Drinker ≥2 go /day <sup>d</sup>       | 11.3       | 11.3       | 12.0       |       | 2.9        | 2.4        | 3.2        |       |
| BMI (kg/m <sup>2</sup> ) <sup>b</sup> | 22.4 ± 3.3 | 23.4 ± 3.3 | 24.6 ± 3.7 | <0.00 | 21.0 ± 3.5 | 21.8 ± 3.5 | 22.5 ± 3.8 | <0.00 |

|                                               |               |               |                 |       |              |              |               |       |
|-----------------------------------------------|---------------|---------------|-----------------|-------|--------------|--------------|---------------|-------|
|                                               |               |               |                 | 1     |              |              |               | 1     |
|                                               |               |               |                 | <0.00 |              |              |               | <0.00 |
| Waist circumference (cm) <sup>b</sup>         | 80.3 ± 9.2    | 82.9 ± 9.0    | 86.0 ± 9.8      |       | 75.5 ± 9.5   | 77.7 ± 9.4   | 79.6 ± 9.8    |       |
|                                               |               |               |                 | 1     |              |              |               | 1     |
|                                               |               |               |                 | <0.00 |              |              |               | <0.00 |
| Systolic blood pressure (mm Hg) <sup>b</sup>  | 123.5 ± 15.5  | 126.1 ± 15.5  | 126.7 ± 15.1    |       | 113.1 ± 16.3 | 117.3 ± 17.2 | 117.0 ± 17.2  |       |
|                                               |               |               |                 | 1     |              |              |               | 1     |
|                                               |               |               |                 | <0.00 |              |              |               | <0.00 |
| Diastolic blood pressure (mm Hg) <sup>b</sup> | 75.2 ± 11.4   | 77.3 ± 11.9   | 78.0 ± 12.0     |       | 69.1 ± 10.9  | 71.4 ± 11.5  | 71.5 ± 11.9   |       |
|                                               |               |               |                 | 1     |              |              |               | 1     |
|                                               |               |               |                 |       | 87 (82 to    | 88 (83 to    |               |       |
| Fasting plasma glucose (mg/dL) <sup>c</sup>   | 91 (85 to 98) | 92 (86 to 99) | 92 (86 to 99)   | 0.001 | 93)          | 94)          | 88 (83 to 94) | 0.001 |
|                                               |               |               |                 |       |              |              |               |       |
|                                               |               |               |                 | <0.00 | 63 (48 to    | 69 (51 to    | 71 (52 to     | <0.00 |
| Triglyceride (mg/dL) <sup>c</sup>             | 92 (65 to     | 99 (69 to     | 107 (73 to 161) |       | 87)          | 96)          | 101)          |       |
|                                               | 138)          | 148)          |                 | 1     |              |              |               | 1     |

1  
2  
3  
4  
5  
6  
7  
8  
9  
10  
11  
12  
13  
14  
15  
16  
17  
18  
19  
20  
21  
22  
23  
24  
25  
26  
27  
28  
29  
30  
31  
32  
33  
34  
35  
36  
37  
38  
39  
40  
41  
42  
43  
44  
45  
46  
47  
48  
49

|                            |             |             |             |       |             |             |             |       |
|----------------------------|-------------|-------------|-------------|-------|-------------|-------------|-------------|-------|
|                            |             |             |             | <0.00 |             |             |             | <0.00 |
| HDL-C (mg/dL) <sup>b</sup> | 61.3 ± 15.3 | 59.4 ± 15.0 | 57.2 ± 14.3 |       | 71.4 ± 15.3 | 70.5 ± 15.8 | 69.3 ± 15.5 |       |
|                            |             |             |             | 1     |             |             |             | 1     |

Cross to sectional survey of 56,865 examinees in All Japan Labor Welfare Foundation, Japan, 2011.

BMI=body mass index; HDL-C=high to density lipoprotein cholesterol.

<sup>a</sup> Linear regression, an extension of the Wilcoxon Rank-Sum test and logistic regression, assigning ordinal number (0 to 2) to eating rate, as appropriate.

<sup>b</sup> Mean ± SD.

<sup>c</sup> medians (interquartile range).

<sup>d</sup> One go contains ~25g of ethanol.

Table 2. Odds ratios and 95% confidence intervals for metabolic syndrome according to eating rate (n = 56,865)

| Eating rate          | Men (n = 41,820)    |                     |                     | P for trend <sup>b</sup> | Women (n = 15,045)  |                     |                     | P for trend <sup>b</sup> |
|----------------------|---------------------|---------------------|---------------------|--------------------------|---------------------|---------------------|---------------------|--------------------------|
|                      | Slow                | Normal <sup>a</sup> | Fast                |                          | Slow                | Normal <sup>a</sup> | Fast                |                          |
| n (%)                | 2,821 (6.8)         | 24,893 (59.5)       | 14,106 (33.7)       |                          | 1,398 (9.3)         | 9,893 (65.8)        | 3,754 (24.9)        |                          |
| MetS, n              | 361                 | 4,180               | 3,193               |                          | 116                 | 1,261               | 547                 |                          |
| Model 1 <sup>c</sup> | 0.70 (0.62 to 0.79) | 1.00                | 1.62 (1.53 to 1.71) | <0.001                   | 0.75 (0.61 to 0.92) | 1.00                | 1.27 (1.13 to 1.42) | <0.001                   |
| Model 2 <sup>d</sup> | 0.70 (0.62 to 0.79) | 1.00                | 1.61 (1.53 to 1.70) | <0.001                   | 0.74 (0.60 to 0.91) | 1.00                | 1.27 (1.13 to 1.43) | <0.001                   |



1  
2  
3  
4  
5  
6  
7  
8  
9  
10  
11  
12  
13  
14  
15  
16  
17  
18  
19  
20  
21  
22  
23  
24  
25  
26  
27  
28  
29  
30  
31  
32  
33  
34  
35  
36  
37  
38  
39  
40  
41  
42  
43  
44  
45  
46  
47  
48  
49

|              |               |      |               |       |               |      |               |       |
|--------------|---------------|------|---------------|-------|---------------|------|---------------|-------|
| Model 3      | 0.91 (0.80 to |      | 1.10 (1.03 to | <0.00 | 0.88 (0.70 to |      | 0.98 (0.86 to |       |
|              |               | 1.00 |               | 1     | 1.11)         | 1.00 |               | 0.714 |
| <sup>c</sup> | 1.04)         |      | 1.17)         |       |               |      | 1.12)         |       |

**MetS as defined using the criteria of the Joint Interim Statement** : the presence of three or more of the following risk factors: 1) waist circumference  $\geq 90$  cm in men and  $\geq 80$  cm in women, 2) triglyceride level  $\geq 150$  mg/dL (1.7 mmol/L), 3) HDL-C level  $< 40$  mg/dL (1.04 mmol/L) in men and  $< 50$  mg/dL (1.3 mmol/L) in women, 4) blood pressure  $\geq 130$  mm Hg systolic or  $\geq 85$  mm Hg diastolic, 5) fasting glucose level  $\geq 100$  mg/dL (5.6 mmol/L).

<sup>a</sup> Reference.

<sup>b</sup> Multiple logistic regression, assigning ordinal number (0 to 2) to eating rate.

<sup>c</sup> Adjusted for age.

<sup>d</sup> Adjusted for age, smoking status, alcohol, and regular physical activity.

<sup>e</sup> Adjusted for age, smoking status, alcohol, regular physical activity, and body mass index.

Table 3. Odds ratios and 95% confidence intervals for components of metabolic syndrome according to eating rate (n = 56,865)

| Eating rate                  | Men (n = 41,820)    |                     |                     | P for trend <sup>b</sup> | Women (n = 15,045)  |                     |                     | P for trend <sup>b</sup> |
|------------------------------|---------------------|---------------------|---------------------|--------------------------|---------------------|---------------------|---------------------|--------------------------|
|                              | Slow                | Normal <sup>a</sup> | Fast                |                          | Slow                | Normal <sup>a</sup> | Fast                |                          |
| n (%)                        | 2,821 (6.8)         | 24,893 (59.5)       | 14,106 (33.7)       |                          | 1,398 (9.3)         | 9,893 (65.8)        | 3,754 (24.9)        |                          |
| Central obesity <sup>c</sup> |                     |                     |                     |                          |                     |                     |                     |                          |
| Model 1 <sup>d</sup>         | 0.63 (0.56 to 0.71) | 1.00                | 1.98 (1.89 to 2.08) | <0.001                   | 0.73 (0.64 to 0.83) | 1.00                | 1.44 (1.34 to 1.56) | <0.001                   |
| Model 2 <sup>e</sup>         | 0.63 (0.56 to 0.70) | 1.00                | 1.97 (1.88 to 2.07) | <0.001                   | 0.73 (0.64 to 0.83) | 1.00                | 1.44 (1.33 to 1.56) | <0.001                   |

1  
2  
3  
4  
5  
6  
7  
8  
9  
10  
11  
12  
13  
14  
15  
16  
17  
18  
19  
20  
21  
22  
23  
24  
25  
26  
27  
28  
29  
30  
31  
32  
33  
34  
35  
36  
37  
38  
39  
40  
41  
42  
43  
44  
45  
46  
47  
48  
49

High blood pressure <sup>f</sup>

|                      |                     |      |                     |        |                     |      |                     |        |
|----------------------|---------------------|------|---------------------|--------|---------------------|------|---------------------|--------|
| Model 1 <sup>d</sup> | 0.75 (0.69 to 0.82) | 1.00 | 1.22 (1.17 to 1.27) | <0.001 | 0.76 (0.66 to 0.88) | 1.00 | 1.10 (1.01 to 1.21) | <0.001 |
| Model 2 <sup>e</sup> | 0.74 (0.68 to 0.81) | 1.00 | 1.20 (1.15 to 1.26) | <0.001 | 0.76 (0.65 to 0.88) | 1.00 | 1.10 (1.00 to 1.20) | <0.001 |
| Model 3 <sup>g</sup> | 0.88 (0.81 to 0.96) | 1.00 | 0.97 (0.93 to 1.02) | 0.645  | 0.85 (0.72 to 0.99) | 1.00 | 0.93 (0.84 to 1.02) | 0.923  |

High fasting plasma glucose <sup>h</sup>

|                      |                     |      |                     |        |                     |      |                     |       |
|----------------------|---------------------|------|---------------------|--------|---------------------|------|---------------------|-------|
| Model 1 <sup>d</sup> | 0.78 (0.71 to 0.87) | 1.00 | 1.17 (1.12 to 1.23) | <0.001 | 1.03 (0.85 to 1.25) | 1.00 | 1.17 (1.04 to 1.31) | 0.035 |
| Model 2 <sup>e</sup> | 0.78 (0.71 to 0.87) | 1.00 | 1.16 (1.11 to 1.23) | <0.001 | 1.03 (0.85 to 1.25) | 1.00 | 1.16 (1.03 to 1.31) | 0.042 |

|                                |               |      |               |       |               |      |               |       |
|--------------------------------|---------------|------|---------------|-------|---------------|------|---------------|-------|
|                                | 0.87)         |      | 1.22)         | 1     | 1.25)         |      | 1.31)         |       |
| Model 3 <sup>g</sup>           | 0.88 (0.80 to | 1.00 | 0.99 (0.94 to | 0.238 | 1.14 (0.94 to | 1.00 | 1.02 (0.90 to | 0.536 |
|                                | 0.98)         |      | 1.05)         |       | 1.40)         |      | 1.15)         |       |
| High triglyceride <sup>i</sup> |               |      |               |       |               |      |               |       |
| Model 1 <sup>d</sup>           | 0.88 (0.80 to | 1.00 | 1.32 (1.26 to | <0.00 | 0.83 (0.67 to | 1.00 | 1.14 (1.01 to | 0.002 |
|                                | 0.96)         |      | 1.38)         | 1     | 1.01)         |      | 1.28)         |       |
| Model 2 <sup>e</sup>           | 0.90 (0.82 to | 1.00 | 1.33 (1.27 to | <0.00 | 0.81 (0.66 to | 1.00 | 1.13 (1.01 to | 0.002 |
|                                | 0.98)         |      | 1.39)         | 1     | 1.00)         |      | 1.27)         |       |
| Model 3 <sup>g</sup>           | 1.08 (0.98 to | 1.00 | 1.07 (1.02 to | 0.121 | 0.90 (0.73 to | 1.00 | 0.98 (0.87 to | 0.753 |
|                                | 1.19)         |      | 1.12)         |       | 1.11)         |      | 1.11)         |       |
| Low HDL-C <sup>j</sup>         |               |      |               |       |               |      |               |       |

1  
2  
3  
4  
5  
6  
7  
8  
9  
10  
11  
12  
13  
14  
15  
16  
17  
18  
19  
20  
21  
22  
23  
24  
25  
26  
27  
28  
29  
30  
31  
32  
33  
34  
35  
36  
37  
38  
39  
40  
41  
42  
43  
44  
45  
46  
47  
48  
49

|                      |                     |      |                     |        |                     |      |                     |       |
|----------------------|---------------------|------|---------------------|--------|---------------------|------|---------------------|-------|
| Model 1 <sup>c</sup> | 0.83 (0.73 to 0.96) | 1.00 | 1.34 (1.26 to 1.43) | <0.001 | 0.90 (0.74 to 1.09) | 1.00 | 1.11 (0.99 to 1.25) | 0.018 |
| Model 2 <sup>d</sup> | 0.83 (0.73 to 0.96) | 1.00 | 1.36 (1.28 to 1.45) | <0.001 | 0.89 (0.74 to 1.08) | 1.00 | 1.12 (1.00 to 1.26) | 0.011 |
| Model 3 <sup>e</sup> | 0.97 (0.84 to 1.12) | 1.00 | 1.10 (1.03 to 1.18) | 0.004  | 1.00 (0.82 to 1.22) | 1.00 | 0.96 (0.85 to 1.08) | 0.500 |

BMI=body mass index; HDL-C=high to density lipoprotein cholesterol.

<sup>a</sup> Reference.

<sup>b</sup> Multiple logistic regression, assigning ordinal number (0 to 2) to eating rate.

<sup>c</sup> Waist circumference  $\geq 90$  cm in men,  $\geq 80$  cm in women.

<sup>d</sup> Adjusted for age.

<sup>e</sup> Adjusted for age, smoking status, alcohol, and regular physical activity.

1  
2  
3  
4  
5  
6  
7 <sup>f</sup> Blood pressure  $\geq 130$  mm Hg for systolic or  $\geq 85$  mm Hg for diastolic.  
8

9  
10 <sup>g</sup> Adjusted for age, smoking status, alcohol, regular physical activity and body mass index.  
11

12  
13 <sup>h</sup> Fasting plasma glucose  $\geq 100$  mg/dL or under medication.  
14

15  
16 <sup>i</sup> Triglyceride  $\geq 150$  mg/dL or under medication.  
17

18  
19 <sup>j</sup> HDL-C  $< 40$  mg/dL in men,  $< 50$  mg/dL in women or under medication.  
20  
21  
22  
23  
24  
25  
26  
27  
28  
29  
30  
31  
32  
33  
34  
35  
36  
37  
38  
39  
40  
41  
42  
43  
44  
45  
46  
47  
48  
49

## Acknowledgments

The authors would like to thank Dr. Nobuo Yanagisawa and Dr. Takeshi Kawaguchi for their coordinating the study.

Contributors: SN and KKurotani designed study and drafted the manuscript. SN, NMP, AN, KKuwahara performed the data analysis. MD collected and interpreted the data. All authors have participated in the interpretation of the findings, revised it critically for important intellectual content and approved final version to be published. TM and YN provided administrative, technical and material support. SN and TM are guarantors.

Funding: This study was supported by the Industrial Health Foundation.

Competing interests: All authors have completed the ICMJE uniform disclosure form at [www.icmje.org/coi\\_disclosure.pdf](http://www.icmje.org/coi_disclosure.pdf) and declare: all authors declare no interests.

Ethical approval: The research protocol was approved by the Ethics Committee of the National Center for Global Health and Medicine and the Ethics Committee of Toho University.

Data sharing: No additional data available.

Transparency: SN affirms that the manuscript is an honest, accurate, and transparent account of the study being reported; that no important aspects of the study have been omitted; and that any discrepancies from the study as planned (and, if relevant,

1  
2  
3  
4  
5  
6 registered) have been explained.  
7  
8  
9  
10  
11  
12  
13  
14  
15  
16  
17  
18  
19  
20  
21  
22  
23  
24  
25  
26  
27  
28  
29  
30  
31  
32  
33  
34  
35  
36  
37  
38  
39  
40  
41  
42  
43  
44  
45  
46  
47  
48  
49  
50  
51  
52  
53  
54  
55  
56  
57  
58  
59  
60

For peer review only



## References

1. Eckel RH, Alberti KG, Grundy SM, et al. The metabolic syndrome. *Lancet* 2010;**375**:181-83.
2. Gomez-Martinez S, Martinez-Gomez D, Perez de Heredia F, et al. Eating habits and total and abdominal fat in Spanish adolescents: influence of physical activity. The AVENA study. *J Adolesc Health* 2012;**50**:403-09.
3. Ilanne-Parikka P, Eriksson JG, Lindstrom J, et al. Effect of lifestyle intervention on the occurrence of metabolic syndrome and its components in the Finnish Diabetes Prevention Study. *Diabetes care* 2008;**31**:805-07.
4. Nanri A, Tomita K, Matsushita Y, et al. Effect of six months lifestyle intervention in Japanese men with metabolic syndrome: randomized controlled trial. *J Occup Health* 2012;**54**:215-22.
5. Ferster CB, Nurnberger JI, Levitt EB. The control of eating. 1962. *Obes Res* 1996;**4**:401-10.
6. Hill SW, McCutcheon NB. Eating responses of obese and nonobese humans during dinner meals. *Psychosom Med* 1975;**37**:395-401.
7. Bellack AS. Behavior therapy for weight reduction. *Addict Behav* 1975;**1**:73-82.
8. Otsuka R, Tamakoshi K, Yatsuya H, et al. Eating fast leads to obesity: findings based

1  
2  
3  
4  
5  
6 on self-administered questionnaires among middle-aged Japanese men and women. *J*  
7  
8  
9 *Epidemiol* 2006;**16**:117-24.

10  
11 9. Sasaki S, Katagiri A, Tsuji T, et al. Self-reported rate of eating correlates with body  
12  
13 mass index in 18-y-old Japanese women. *Int J Obes Relat Metab Disord*  
14  
15 2003;**27**:1405-10.  
16  
17

18  
19 10. Maruyama K, Sato S, Ohira T, et al. The joint impact on being overweight of self  
20  
21 reported behaviours of eating quickly and eating until full: cross sectional survey. *BMJ*  
22  
23 2008;**337**:a2002.  
24  
25  
26

27  
28 11. Lee KS, Kim DH, Jang JS, et al. Eating rate is associated with cardiometabolic risk  
29  
30 factors in Korean adults. *Nut Metab Cardiovasc Dis* 2013;**23**:635-41.  
31  
32

33  
34 12. Otsuka R, Tamakoshi K, Yatsuya H, et al. Eating fast leads to insulin resistance:  
35  
36 findings in middle-aged Japanese men and women. *Prev Med* 2008;**46**:154-59.  
37  
38

39  
40 13. Radzeviciene L, Ostrauskas R. Fast eating and the risk of type 2 diabetes mellitus: a  
41  
42 case-control study. *Clin Nutr* 2013;**32**:232-35.  
43  
44

45  
46 14. Ohkuma T, Fujii H, Iwase M, et al. Impact of eating rate on obesity and  
47  
48 cardiovascular risk factors according to glucose tolerance status: the Fukuoka Diabetes  
49  
50 Registry and the Hisayama Study. *Diabetologia* 2013;**56**:70-77.  
51  
52

53  
54 15. Shigeta H, Shigeta M, Nakazawa A, et al. Lifestyle, obesity, and insulin resistance.  
55  
56  
57  
58  
59  
60

1  
2  
3  
4  
5  
6  
7  
8  
9  
10  
11  
12  
13  
14  
15  
16  
17  
18  
19  
20  
21  
22  
23  
24  
25  
26  
27  
28  
29  
30  
31  
32  
33  
34  
35  
36  
37  
38  
39  
40  
41  
42  
43  
44  
45  
46  
47  
48  
49  
50  
51  
52  
53  
54  
55  
56  
57  
58  
59  
60

*Diabetes care* 2001;**24**:608.

16. Gerace TA, George VA. Predictors of weight increases over 7 years in fire fighters and paramedics. *Prev Med* 1996;**25**:593-600.

17. Tanihara S, Imatoh T, Miyazaki M, et al. Retrospective longitudinal study on the relationship between 8-year weight change and current eating speed. *Appetite* 2011;**57**:179-83.

18. Sakurai M, Nakamura K, Miura K, et al. Self-reported speed of eating and 7-year risk of type 2 diabetes mellitus in middle-aged Japanese men. *Metabolism* 2012;**61**:1566-71.

19. Kral JG, Buckley MC, Kissileff HR, et al. Metabolic correlates of eating behavior in severe obesity. *Int J Obes Relat Metab Disord* 2001;**25**:258-64.

20. Shin A, Lim SY, Sung J, et al. Dietary intake, eating habits, and metabolic syndrome in Korean men. *J Am Diet Assoc* 2009;**109**:633-40.

21. Shen W, Punyanitya M, Chen J, et al. Waist circumference correlates with metabolic syndrome indicators better than percentage fat. *Obesity (Silver Spring)* 2006;**14**:727-36.

22. Alberti KG, Eckel RH, Grundy SM, et al. Harmonizing the metabolic syndrome: a joint interim statement of the International Diabetes Federation Task Force on Epidemiology and Prevention; National Heart, Lung, and Blood Institute; American

1  
2  
3  
4  
5  
6 Heart Association; World Heart Federation; International Atherosclerosis Society; and  
7  
8  
9 International Association for the Study of Obesity. *Circulation* 2009;**120**:1640-5.

10  
11  
12 23. Ministry of Justice, Japan. Industrial Safty and Health Act, Article 66 (Medical  
13  
14 Examination). Available at:

15  
16  
17 <http://www.japaneselawtranslation.go.jp/law/detail/?id=1926&vm=&re=>. Accessed 26  
18  
19  
20 May 2014.

21  
22  
23 24. Ministry of Health, Labour and Welfare. Specific Health Checkups and Specific  
24  
25 Health Guidance. Secondary Specific Health Checkups and Specific Health Guidance.

26  
27 Available at: <http://www.mhlw.go.jp/english/wp/wp-hw3/dl/2-007.pdf>. Accessed 26  
28  
29  
30 May 2014.

31  
32  
33 25. Ministry of Health, Labour and Welfare. Questionnaire of Specific Health Checkups.  
34  
35  
36  
37  
38  
39  
40  
41  
42  
43  
44  
45  
46  
47  
48  
49  
50  
51  
52  
53  
54  
55  
56  
57  
58  
59  
60  
Secondary Questionnaire of Specific Health Checkups. Available at:

[http://www.mhlw.go.jp/seisakunitsuite/bunya/kenkou\\_iryuu/kenkou/seikatsu/dl/hoken-program2\\_02.pdf](http://www.mhlw.go.jp/seisakunitsuite/bunya/kenkou_iryuu/kenkou/seikatsu/dl/hoken-program2_02.pdf). Accessed 26 May 2014. (in Japanese)

26. Hill SW, McCutcheon NB. Contributions of obesity, gender, hunger, food preference, and body size to bite size, bite speed, and rate of eating. *Appetite* 1984;**5**:73-83.

27. Ekuni D, Furuta M, Takeuchi N, et al. Self-reports of eating quickly are related to a decreased number of chews until first swallow, total number of chews, and total

1  
2  
3  
4  
5  
6 duration of chewing in young people. *Arch Oral Biol* 2012;**57**:981-86.  
7

8  
9 28. Rolls ET. Sensory processing in the brain related to the control of food intake. *Proc*  
10  
11  
12 *Nutr Soc* 2007;**66**:96-112.  
13

14  
15 29. Morton GJ, Cummings DE, Baskin DG, et al. Central nervous system control of  
16  
17  
18 food intake and body weight. *Nature* 2006;**443**:289-95.  
19

20  
21 30. de Graaf C, Blom WA, Smeets PA, et al. Biomarkers of satiation and satiety. *Am J*  
22  
23  
24 *Clin Nutr* 2004;**79**:946-61.  
25

26  
27 31. Kokkinos A, le Roux CW, Alexiadou K, et al. Eating slowly increases the  
28  
29  
30 postprandial response of the anorexigenic gut hormones, peptide YY and glucagon-like  
31  
32  
33 peptide-1. *J Clin Endocrinol Metab* 2010;**95**:333-37.  
34

35  
36 32. Sobki SH, Zaid AA, Khan HA, et al. Significant impact of pace of eating on serum  
37  
38  
39 ghrelin and glucose levels. *Clin Biochem* 2010;**43**:522-24.  
40

41  
42 33. Viskaal-van Dongen M, Kok FJ, de Graaf C. Eating rate of commonly consumed  
43  
44  
45 foods promotes food and energy intake. *Appetite* 2011;**56**:25-31.  
46

47  
48 34. Scisco JL, Muth ER, Dong Y, et al. Slowing bite-rate reduces energy intake: an  
49  
50  
51 application of the bite counter device. *J Am Diet Assoc* 2011;**111**:1231-35.  
52

53  
54 35. Mochizuki K, Misaki Y, Miyauchi R, et al. A higher rate of eating is associated with  
55  
56  
57 higher circulating interleukin-1beta concentrations in Japanese men not being treated for  
58  
59  
60

1  
2  
3  
4  
5  
6 metabolic diseases. *Nutrition* 2012;**28**:978-83.

7  
8  
9 36. Besedovsky H, del Rey A, Sorkin E, et al. Immunoregulatory feedback between  
10  
11 interleukin-1 and glucocorticoid hormones. *Science* 1986;**233**:652-54

12  
13  
14 37. Matsuki T, Horai R, Sudo K, et al. IL-1 plays an important role in lipid metabolism  
15  
16 by regulating insulin levels under physiological conditions. *J Exp Med*  
17  
18  
19  
20  
21 2003;**198**:877-88.

22  
23 38. Yatabe MS, Yatabe J, Yoneda M, et al. Salt sensitivity is associated with insulin  
24  
25  
26  
27  
28  
29  
30  
31  
32  
33  
34  
35  
36  
37  
38  
39  
40  
41  
42  
43  
44  
45  
46  
47  
48  
49  
50  
51  
52  
53  
54  
55  
56  
57  
58  
59  
60  
resistance, sympathetic overactivity, and decreased suppression of circulating renin  
activity in lean patients with essential hypertension. *Am J Clin Nutr* 2010;**92**:77-82.

39. Facchini FS, DoNascimento C, Reaven GM, et al. Blood pressure, sodium intake,  
insulin resistance, and urinary nitrate excretion. *Hypertension* 1999;**33**:1008-12.

40. Pollare T, Lithell H, Berne C. Insulin resistance is a characteristic feature of primary  
hypertension independent of obesity. *Metabolism*. 1990;**39**:167-74.

41. Ministry of Health, Labour and Welfare. Special Survey on Industrial Safety and  
Health. Available at: <http://www.mhlw.go.jp/bunya/roudoukijun/anzeneisei11/h23.html>.  
Accessed 26 May 2014. (in Japanese)

STROBE Statement—Checklist of items that should be included in reports of *cross-sectional studies*

MS ID#: bmjopen-2014-005241.R1

MS TITLE: Self-reported eating rate and metabolic syndrome in Japanese: cross-sectional study

|                              | Item No | Recommendation                                                                                                                                                                       | Location in manuscript                                                                                                 |
|------------------------------|---------|--------------------------------------------------------------------------------------------------------------------------------------------------------------------------------------|------------------------------------------------------------------------------------------------------------------------|
| <b>Title and abstract</b>    | 1       | (a) Indicate the study’s design with a commonly used term in the title or the abstract                                                                                               | Line 1 on page 1 and line 23 on page 3                                                                                 |
|                              |         | (b) Provide in the abstract an informative and balanced summary of what was done and what was found                                                                                  | What was done: line 21-22 on page 3<br>What was found: line 42-44 on page 4                                            |
| <b>Introduction</b>          |         |                                                                                                                                                                                      |                                                                                                                        |
| Background/rationale         | 2       | Explain the scientific background and rationale for the investigation being reported                                                                                                 | Scientific background: line 51-68 on page 6 and 7<br>Rationale: Line 68-74 on page 7                                   |
| Objectives                   | 3       | State specific objectives, including any prespecified hypotheses                                                                                                                     | Line 74-78 on page 7                                                                                                   |
| <b>Methods</b>               |         |                                                                                                                                                                                      |                                                                                                                        |
| Study design                 | 4       | Present key elements of study design early in the paper                                                                                                                              | Line 75 on page 7                                                                                                      |
| Setting                      | 5       | Describe the setting, locations, and relevant dates, including periods of recruitment, exposure, follow-up, and data collection                                                      | Line 84-88 on page 7-8                                                                                                 |
| Participants                 | 6       | (a) Give the eligibility criteria, and the sources and methods of selection of participants                                                                                          | Line 88-95 on page 8                                                                                                   |
| Variables                    | 7       | Clearly define all outcomes, exposures, predictors, potential confounders, and effect modifiers. Give diagnostic criteria, if applicable                                             | Outcome: line 122-128 on page 10<br>Exposure: line 105-107 on page 9<br>Potential confounders: line 140-147 on page 11 |
| Data sources/<br>measurement | 8*      | For each variable of interest, give sources of data and details of methods of assessment (measurement). Describe comparability of assessment methods if there is more than one group | Line 102-120 on page 8 and 9                                                                                           |
| Bias                         | 9       | Describe any efforts to address potential sources of bias                                                                                                                            | Exclusion: line 89-90 on page 8<br>Adjustment: line 140-147 on page 11                                                 |
| Study size                   | 10      | Explain how the study size was arrived at                                                                                                                                            | Not provided                                                                                                           |
| Quantitative<br>variables    | 11      | Explain how quantitative variables were handled in the analyses. If applicable, describe which groupings were chosen and why                                                         | Adjustment: line 140-147 on page 11                                                                                    |

|                     |     |                                                                                                                                                                                                              |                                                                                                              |
|---------------------|-----|--------------------------------------------------------------------------------------------------------------------------------------------------------------------------------------------------------------|--------------------------------------------------------------------------------------------------------------|
| Statistical methods | 12  | (a) Describe all statistical methods, including those used to control for confounding                                                                                                                        | Line 130-151 on page 10-11                                                                                   |
|                     |     | (b) Describe any methods used to examine subgroups and interactions                                                                                                                                          | Line 146-149 on page 11                                                                                      |
|                     |     | (c) Explain how missing data were addressed                                                                                                                                                                  | We excluded participants who had missing information on potential confounding variables (line 90 on page 8). |
|                     |     | (d) If applicable, describe analytical methods taking account of sampling strategy                                                                                                                           | N/A                                                                                                          |
|                     |     | (e) Describe any sensitivity analyses                                                                                                                                                                        | N/A                                                                                                          |
| <b>Results</b>      |     |                                                                                                                                                                                                              |                                                                                                              |
| Participants        | 13* | (a) Report numbers of individuals at each stage of study—eg numbers potentially eligible, examined for eligibility, confirmed eligible, included in the study, completing follow-up, and analysed            | Line 159-160 on page 11<br>Table 1                                                                           |
|                     |     | (b) Give reasons for non-participation at each stage                                                                                                                                                         | N/A                                                                                                          |
|                     |     | (c) Consider use of a flow diagram                                                                                                                                                                           | N/A                                                                                                          |
| Descriptive data    | 14* | (a) Give characteristics of study participants (eg demographic, clinical, social) and information on exposures and potential confounders                                                                     | Table 1<br>Line 154-178 on page 12 and 13                                                                    |
|                     |     | (b) Indicate number of participants with missing data for each variable of interest                                                                                                                          | N/A                                                                                                          |
| Outcome data        | 15* | Report numbers of outcome events or summary measures                                                                                                                                                         | Table 2<br>Line 154 on page 11                                                                               |
| Main results        | 16  | (a) Give unadjusted estimates and, if applicable, confounder-adjusted estimates and their precision (eg, 95% confidence interval). Make clear which confounders were adjusted for and why they were included | Table 2, Table3<br>Line 159- on page 11-12                                                                   |
|                     |     | (b) Report category boundaries when continuous variables were categorized                                                                                                                                    | Table2, Table3                                                                                               |
|                     |     | (c) If relevant, consider translating estimates of relative risk into absolute risk for a meaningful time period                                                                                             | N/A                                                                                                          |
| Other analyses      | 17  | Report other analyses done—eg analyses of subgroups and interactions, and sensitivity analyses                                                                                                               | Line 147-149 on page 11                                                                                      |
| <b>Discussion</b>   |     |                                                                                                                                                                                                              |                                                                                                              |
| Key results         | 18  | Summarise key results with reference to study objectives                                                                                                                                                     | Line 181-185 on page 13                                                                                      |
| Limitations         | 19  | Discuss limitations of the study, taking into account sources of potential bias                                                                                                                              | Line 233-247 on page 16                                                                                      |



1  
2  
3  
4  
5  
6  
7  
8  
9  
10  
11  
12  
13  
14  
15  
16  
17  
18  
19  
20  
21  
22  
23  
24  
25  
26  
27  
28  
29  
30  
31  
32  
33  
34  
35  
36  
37  
38  
39  
40  
41  
42  
43  
44  
45  
46  
47  
48  
49

or imprecision. Discuss both direction and magnitude of any potential bias

---

|                |    |                                                                                                                                                                            |                            |
|----------------|----|----------------------------------------------------------------------------------------------------------------------------------------------------------------------------|----------------------------|
| Interpretation | 20 | Give a cautious overall interpretation of results considering objectives, limitations, multiplicity of analyses, results from similar studies, and other relevant evidence | Line 188-209 on page 13-14 |
|----------------|----|----------------------------------------------------------------------------------------------------------------------------------------------------------------------------|----------------------------|

---

|                  |    |                                                                       |                         |
|------------------|----|-----------------------------------------------------------------------|-------------------------|
| Generalisability | 21 | Discuss the generalisability (external validity) of the study results | Line 243-244 on page 16 |
|------------------|----|-----------------------------------------------------------------------|-------------------------|

---

**Other information**

---

|         |    |                                                                                                                                                               |                                                                                           |
|---------|----|---------------------------------------------------------------------------------------------------------------------------------------------------------------|-------------------------------------------------------------------------------------------|
| Funding | 22 | Give the source of funding and the role of the funders for the present study and, if applicable, for the original study on which the present article is based | This study was supported by the Industrial Health Foundation for drafting the manuscript. |
|---------|----|---------------------------------------------------------------------------------------------------------------------------------------------------------------|-------------------------------------------------------------------------------------------|

---

N/A: Not applicable.

\*Give information separately for exposed and unexposed groups.

**Note:** An Explanation and Elaboration article discusses each checklist item and gives methodological background and published examples of transparent reporting. The STROBE checklist is best used in conjunction with this article (freely available on the Web sites of PLoS Medicine at <http://www.plosmedicine.org/>, Annals of Internal Medicine at <http://www.annals.org/>, and Epidemiology at <http://www.epidem.com/>). Information on the STROBE Initiative is available at [www.strobe-statement.org](http://www.strobe-statement.org).

# BMJ Open

## Self-reported eating rate and metabolic syndrome in Japanese: cross-sectional study

|                                 |                                                                                                                                                                                                                                                                                                                                                                                                                                                                                                                                                                                                                                                                                                                                                                                                                                                                                                                                                                                                                                                                                                    |
|---------------------------------|----------------------------------------------------------------------------------------------------------------------------------------------------------------------------------------------------------------------------------------------------------------------------------------------------------------------------------------------------------------------------------------------------------------------------------------------------------------------------------------------------------------------------------------------------------------------------------------------------------------------------------------------------------------------------------------------------------------------------------------------------------------------------------------------------------------------------------------------------------------------------------------------------------------------------------------------------------------------------------------------------------------------------------------------------------------------------------------------------|
| Journal:                        | <i>BMJ Open</i>                                                                                                                                                                                                                                                                                                                                                                                                                                                                                                                                                                                                                                                                                                                                                                                                                                                                                                                                                                                                                                                                                    |
| Manuscript ID:                  | bmjopen-2014-005241.R2                                                                                                                                                                                                                                                                                                                                                                                                                                                                                                                                                                                                                                                                                                                                                                                                                                                                                                                                                                                                                                                                             |
| Article Type:                   | Research                                                                                                                                                                                                                                                                                                                                                                                                                                                                                                                                                                                                                                                                                                                                                                                                                                                                                                                                                                                                                                                                                           |
| Date Submitted by the Author:   | 31-Jul-2014                                                                                                                                                                                                                                                                                                                                                                                                                                                                                                                                                                                                                                                                                                                                                                                                                                                                                                                                                                                                                                                                                        |
| Complete List of Authors:       | Nagahama, Satsue; All Japan Labor Welfare Foundation, ; School of Medicine, Toho University, Department of Environmental and Occupational Health<br>Kurotani, Kayo; National Center for Global Health and Medicine, Department of Epidemiology and Prevention, Center for Clinical Sciences<br>Pham, Ngoc Minh; Thai Nguyen University of Medicine and Pharmacy, Department of Epidemiology, Faculty of Public Health<br>Nanri, Akiko; National Center for Global Health and Medicine, Department of Epidemiology and Prevention, Center for Clinical Sciences<br>Kuwahara, Keisuke; National Center for Global Health and Medicine, Department of Epidemiology and Prevention, Center for Clinical Sciences<br>Dan, Masashi; All Japan Labor Welfare Foundation, Department of Epidemiology and Prevention, Center for Clinical Sciences<br>Nishiwaki, Yuji; School of Medicine, Toho University, Department of Environmental and Occupational Health<br>Mizoue, Tetsuya; National Center for Global Health and Medicine, Department of Epidemiology and Prevention, Center for Clinical Sciences |
| <b>Primary Subject Heading</b>: | Epidemiology                                                                                                                                                                                                                                                                                                                                                                                                                                                                                                                                                                                                                                                                                                                                                                                                                                                                                                                                                                                                                                                                                       |
| Secondary Subject Heading:      | Epidemiology                                                                                                                                                                                                                                                                                                                                                                                                                                                                                                                                                                                                                                                                                                                                                                                                                                                                                                                                                                                                                                                                                       |
| Keywords:                       | EPIDEMIOLOGY, PREVENTIVE MEDICINE, PUBLIC HEALTH                                                                                                                                                                                                                                                                                                                                                                                                                                                                                                                                                                                                                                                                                                                                                                                                                                                                                                                                                                                                                                                   |
|                                 |                                                                                                                                                                                                                                                                                                                                                                                                                                                                                                                                                                                                                                                                                                                                                                                                                                                                                                                                                                                                                                                                                                    |

SCHOLARONE™  
Manuscripts

1  
2  
3  
4  
5  
6 1 **Self-reported eating rate and metabolic syndrome in Japanese: cross-sectional**  
7  
8  
9 2 **study**

10  
11  
12 3  
13  
14 4 Satsue Nagahama <sup>1 2 3\*</sup>, Kayo Kurotani <sup>1</sup>, Ngoc Minh Pham <sup>4</sup>, Akiko Nanri <sup>1</sup>, Keisuke  
15  
16  
17 5 Kuwahara <sup>1</sup>, Masashi Dan <sup>2</sup>, Yuji Nishiwaki <sup>3</sup>, Tetsuya Mizoue <sup>1</sup>  
18  
19  
20  
21 6

22  
23 7 <sup>1</sup> Department of Epidemiology and Prevention, Center for Clinical Sciences, National  
24  
25  
26 8 Center for Global Health and Medicine, 1-21-1, Toyama, Shinjuku-ku, Tokyo, Japan,  
27  
28  
29 9 Zip162-8655; Tel +81-3-3202-7181, Fax 81-3-3202-7364,  
30  
31  
32 10 E-mail: [satsue\\_0323@hotmail.com](mailto:satsue_0323@hotmail.com)  
33

34  
35 11 <sup>2</sup> All Japan Labor Welfare Foundation, Tokyo, Japan;  
36

37  
38 12 <sup>3</sup> Department of Environmental and Occupational Health, School of Medicine, Toho  
39  
40  
41 13 University, Tokyo, Japan;  
42

43  
44 14 <sup>4</sup> Department of Epidemiology, Faculty of Public Health, Thai Nguyen University of  
45  
46  
47 15 Medicine and Pharmacy, Thai Nguyen Province, Vietnam;  
48

49  
50 16

51  
52 17 Keywords: eating rate, metabolic syndrome, health checkup, Japan, Joint Interim  
53  
54  
55 18 Statement  
56  
57  
58  
59  
60

19 Word count: 2875

For peer review only

1  
2  
3  
4  
5  
6  
7  
8  
9  
10  
11  
12  
13  
14  
15  
16  
17  
18  
19  
20  
21  
22  
23  
24  
25  
26  
27  
28  
29  
30  
31  
32  
33  
34  
35  
36  
37  
38  
39  
40  
41  
42  
43  
44  
45  
46  
47  
48  
49  
50  
51  
52  
53  
54  
55  
56  
57  
58  
59  
60

1  
2  
3  
4  
5  
6 20 **ABSTRACT**  
7  
8

9 21 **Objectives:** To examine the association between self-reported eating rate and metabolic  
10  
11  
12 22 syndrome.

13  
14  
15 23 **Design:** Cross-sectional study.  
16

17  
18 24 **Setting:** Annual health checkup at a health check service center in Japan.  
19

20  
21 25 **Participants:** A total of 56,865 participants (41,820 males and 15,045 females) who  
22  
23  
24 26 attended health checkup in 2011 and reported not to have a history of coronary heart  
25  
26  
27 27 disease or stroke.  
28

29  
30 28 **Main outcome measure:** Metabolic syndrome was defined by the joint of interim  
31  
32  
33 29 statement of the International Diabetes Federation and the American Heart  
34  
35 30 Association/National Heart, Lung, and Blood Institute.  
36

37  
38 31 **Results:** In multiple logistic regression models, eating rate was significantly and  
39  
40  
41 32 positively associated with metabolic syndrome. The multivariable-adjusted odds ratios  
42  
43  
44 33 (95% confidence interval) for slow, normal and fast were 0.70 (0.62 to 0.79), 1.00  
45  
46  
47 34 (reference) and 1.61 (1.53 to 1.70), respectively, in men (P for trend <0.001), and 0.74  
48  
49  
50 35 (0.60 to 0.91), 1.00 (reference) and 1.27 (1.13 to 1.43), respectively, in women (P for  
51  
52  
53 36 trend <0.001). Of metabolic syndrome components, abdominal obesity showed the  
54  
55  
56 37 strongest association with eating rate. The associations of eating rate and metabolic  
57  
58  
59  
60

1  
2  
3  
4  
5  
6 38 syndrome and its components were largely attenuated after further adjustment for body  
7  
8  
9 39 mass index; however, the association of slow eating with lower odds of high blood  
10  
11  
12 40 pressure (men and women) and hyperglycemia (men) and that of fast eating with higher  
13  
14  
15 41 odds of lipid abnormality (men) remained statistically significant.  
16

17 42 **Conclusions:** Results suggest that eating rate is associated with the presence of  
18  
19  
20  
21 43 metabolic syndrome and that this association is largely accounted for by the difference  
22  
23  
24 44 of body mass according to eating rate.  
25  
26  
27  
28  
29  
30  
31  
32  
33  
34  
35  
36  
37  
38  
39  
40  
41  
42  
43  
44  
45  
46  
47  
48  
49  
50  
51  
52  
53  
54  
55  
56  
57  
58  
59  
60

1  
2  
3  
4  
5  
6 45 **Strength and Limitation**  
7

8  
9 46 This study included a large number of participants, used waist circumference in defining  
10  
11  
12 47 metabolic syndrome, and analyzed data for men and women separately.

13  
14  
15 48 Eating rate was assessed by a self-reported questionnaire. Information on dietary intake  
16  
17  
18 49 was not obtained.  
19  
20  
21  
22  
23  
24  
25  
26  
27  
28  
29  
30  
31  
32  
33  
34  
35  
36  
37  
38  
39  
40  
41  
42  
43  
44  
45  
46  
47  
48  
49  
50  
51  
52  
53  
54  
55  
56  
57  
58  
59  
60

1  
2  
3  
4  
5  
6 **50 Introduction**  
7

8  
9 51 Metabolic syndrome (MetS) is a cluster of physiological risk factors associated  
10  
11 52 with cardiovascular disease and several types of cancer.<sup>1</sup> Determination of etiologic  
12  
13 53 factors for MetS is required for the establishment of public health strategies to reduce its  
14  
15 54 prevalence and prevent resulting complications. Growing evidence from both  
16  
17 55 observational and interventional studies suggests a role of dietary habits in the  
18  
19 56 development of MetS,<sup>2-4</sup> which originates from obesity. Obesity has been extensively  
20  
21 57 investigated in relation to dietary habits including eating rate since 1962, when Ferster  
22  
23 58 published a theoretical and practical weight control program focusing on eating  
24  
25 59 behaviors including eating rate.<sup>5</sup> Observational studies showed that obese people ate at a  
26  
27 60 faster rate than non-obese people,<sup>6</sup> and reducing eating rate may be a simple and  
28  
29 61 effective therapy for obesity.<sup>7</sup>  
30  
31  
32  
33  
34  
35  
36  
37  
38  
39  
40

41 62 During the past decade, several cross-sectional studies have found a positive  
42  
43 63 association between eating rate and overweight<sup>8-11</sup> or insulin resistance.<sup>11-15</sup> Similarly, a  
44  
45 64 few longitudinal studies showed that eating fast was associated with an increased risk of  
46  
47 65 weight gain<sup>16, 17</sup> and type 2 diabetes.<sup>18</sup> In addition, some cross-sectional studies have  
48  
49 66 reported that fast eating was positively associated with hypertriglyceridemia and low  
50  
51 67 high-density lipoprotein cholesterol (HDL-C).<sup>11, 14, 19</sup> Therefore it is conceivable that  
52  
53  
54  
55  
56  
57  
58  
59  
60



1  
2  
3  
4  
5  
6 68 eating rate may be associated with MetS. To our knowledge, however, only one Korean  
7  
8  
9 69 study cross-sectionally examined eating rate in relation to MetS.<sup>20</sup> In that study, MetS  
10  
11  
12 70 was defined by using body mass index (BMI), rather than waist circumference, and  
13  
14  
15 71 investigated the association in men only. Waist circumference is a component of most  
16  
17  
18 72 MetS definitions as a surrogate of central obesity, which can better predict  
19  
20  
21 73 cardiovascular risk.<sup>21</sup> It is therefore necessary to examine the relationship between  
22  
23  
24 74 eating rate and MetS using waist circumference in both men and women. Here, we  
25  
26  
27 75 investigated cross-sectionally the association between self-reported eating rate and the  
28  
29  
30 76 presence of MetS according to the joint of interim statement of the International  
31  
32  
33 77 Diabetes Federation and the American Heart Association/National Heart, Lung, and  
34  
35  
36 78 Blood Institute (JIS)<sup>22</sup> using a large dataset of health checkup in Japanese men and  
37  
38  
39 79 women.  
40  
41  
42 80

## 43 44 81 **METHODS AND PROCEDURES**

### 45 46 47 82 **Study population**

48  
49 83 In Japan, health checkup under occupational health and safety law is mandatory  
50  
51  
52 84 for all employed workers<sup>23</sup> and has been modified in 2008 when the recommendation  
53  
54  
55 85 for new national health checkup system focusing on MetS has been launched.<sup>24</sup> Study  
56  
57  
58  
59  
60

1  
2  
3  
4  
5  
6 86 participants were attendants of 2011 (calendar year) annual health checkup at All Japan  
7  
8  
9 87 Labor Welfare Foundation (Tokyo), a health service center performing health checkup.  
10  
11  
12 88 Participants were mainly Japanese employees but also included a small number of their  
13  
14  
15 89 dependents and foreign workers, aged 17-99 in men and 17-85 in women. Of 297,148  
16  
17  
18 90 participants, we excluded 3,660 with a history of myocardial infarction, coronary heart  
19  
20  
21 91 disease or stroke, which might influence both eating rate and MetS. Of the remaining  
22  
23  
24 92 293,488 participants, we included 269,297 who reported their eating rate. Of these, we  
25  
26  
27 93 excluded 182,487 with missing data for any of the components of MetS (173,376  
28  
29  
30 94 without plasma glucose, 61,602 without waist circumference, 43,724 without  
31  
32  
33 95 triglyceride, 43,401 without HDL-C and 504 without blood pressure; some participants  
34  
35  
36 96 had two or more missing data). Major reason for a large number of participants with  
37  
38  
39 97 missing measurement of blood glucose was that HbA1c was measured instead of blood  
40  
41  
42 98 glucose for those who attended checkup in non-fasting condition. Of the remaining  
43  
44  
45 99 86,810 participants, we further excluded 29,337 who took meal within 8 hours before  
46  
47  
48 100 blood drawing or provided no information on meal time. After further exclusion of 608  
49  
50  
51 101 participants with missing information on covariates (BMI, smoking status, alcohol  
52  
53  
54 102 consumption and physical activity), 56,865 participants (41,820 males and 15,045  
55  
56  
57 103 females) remained for analysis. We did not obtain written informed consent from each  
58  
59  
60

1  
2  
3  
4  
5  
6 104 participant; instead, we disclosed the execution of the study by showing posters, giving  
7  
8  
9 105 participants an opportunity to refuse the use of their data for the study. In Japan,  
10  
11  
12 106 informed consent is not necessarily required for observational studies using existing  
13  
14  
15 107 data, as described in the Japanese Ethical Guidelines for Epidemiological Research.<sup>25</sup>  
16

17  
18 108 The research protocol was approved by the Ethics Committee of the National Center for  
19  
20  
21 109 Global Health and Medicine and the Ethics Committee of Toho University.  
22

### 23 110 **Data collection and measurements**

24  
25  
26 111 A self-administered questionnaire, which was recommended for specific health  
27  
28  
29 112 examination by the Japanese government (Ministry of Health, Labour and Welfare),<sup>26</sup>  
30  
31  
32 113 was used to assess eating rate, medical history and health-related lifestyles including  
33  
34  
35 114 smoking, alcohol consumption and regular physical activity. Eating rate was assessed by  
36  
37  
38 115 asking “How fast is your speed of eating?”, with three response options (slow, normal  
39  
40  
41 116 and fast). A trained staff measured height to the nearest 0.1 cm, weight to the nearest 0.1  
42  
43  
44 117 kg and waist circumference to the nearest 0.1 cm at the umbilical level in a standing  
45  
46  
47 118 position. BMI was calculated as the weight in kilograms divided by the squared height  
48  
49  
50 119 in meters. Blood pressure in the sitting position was measured using an automated  
51  
52  
53 120 machine (HEM-907, Omron, Kyoto, Japan). Participants with high blood pressure  
54  
55  
56 121 ( $\geq 130$  mm Hg systolic or  $\geq 85$  mm Hg diastolic) received another measurement and data  
57  
58  
59  
60

1  
2  
3  
4  
5  
6 122 showing lower systolic blood pressure was used. Venous blood sample was collected,  
7  
8  
9 123 stored in a cooler at 4 degrees for transportation to an external laboratory (SRL, Tokyo,  
10  
11  
12 124 Japan) and measured within 24 hours of blood drawing. Triglyceride level was  
13  
14  
15 125 measured by enzymatic colorimetric test (Bio Majesty JCA-BM8060, JEOL, Tokyo,  
16  
17  
18 126 Japan). HDL-C level was determined by a direct method (Bio Majesty JCA-BM8060,  
19  
20  
21 127 JEOL, Tokyo, Japan). Plasma glucose level was determined using by the hexokinase  
22  
23  
24 128 method (an automatic clinical chemistry analyzer JCA-BM9000 series, JEOL, Tokyo,  
25  
26  
27 129 Japan).

### 130 **Definitions for MetS**

131 According to the JIS criteria, MetS was defined as three or more of the  
132 following risk factors: 1) waist circumference for Asian population  $\geq 90$  cm in men and  
133  $\geq 80$  cm in women, 2) triglyceride level  $\geq 150$  mg/dL (1.7 mmol/L), 3) HDL-C level  $< 40$   
134 mg/dL (1.04 mmol/L) in men and  $< 50$  mg/dL (1.3 mmol/L) in women, 4) blood  
135 pressure  $\geq 130$  mm Hg systolic or  $\geq 85$  mm Hg diastolic, 5) fasting glucose level  $\geq 100$   
136 mg/dL (5.6 mmol/L).<sup>22</sup> Participants under medication for diabetes, hypertension and  
137 dyslipidemia were considered as having respective factor, irrespective of measured data.

### 138 **Statistical analysis**

139 Participants were divided into three groups according to eating rate (slow,

1  
2  
3  
4  
5  
6 140 normal and fast). The characteristics of participants across eating rate categories were  
7  
8  
9 141 expressed as means (standard deviation) for continuous variables and percentages for  
10  
11  
12 142 categorical variables, respectively. Fasting plasma glucose and triglyceride were highly  
13  
14  
15 143 skewed; hence, they were log-transformed and expressed as geometric means (95%  
16  
17  
18 144 confidence intervals (CI)). Trend association was assessed by assigning ordinal numbers  
19  
20  
21 145 (0 to 2) to the categories of eating rate (slow, normal and fast, respectively) and was  
22  
23  
24 146 tested using linear regression and logistic regression, as appropriate. Multiple logistic  
25  
26  
27 147 regression analysis was used to estimate the odds ratios (OR) with 95% CI for the  
28  
29  
30 148 presence of MetS across eating rate categories, with normal eating rate as the reference.  
31  
32 149 We adjusted for age (continuous, year) in the basic model. In the second model, we  
33  
34  
35 150 further adjusted for smoking status (non-smoker, daily smoker consuming <20  
36  
37  
38 151 cigarettes per day or  $\geq 20$  cigarettes per day), physical activity (walking time <60 min  
39  
40  
41 152 per day or  $\geq 60$  min per day), and alcohol consumption (non-drinker, <1 *go*, 1 to <2 *go*  
42  
43  
44 153 or  $\geq 2$  *go* per day; one *go* of sake, Japanese traditional beverage, is about 180 ml of 10 to  
45  
46  
47 154 14% of ethanol and contains  $\sim 23$ g of ethanol). In the third model, we added BMI  
48  
49  
50 155 (continuous,  $\text{kg}/\text{m}^2$ ) to the second model. We performed likelihood ratio test for testing  
51  
52  
53 156 the interaction between eating rate and sex. All analyses were done for men and women  
54  
55  
56 157 separately because the interaction was significant (P for interaction <0.001). We  
57  
58  
59  
60

1  
2  
3  
4  
5  
6 158 repeated the above analyses for each component of MetS. Two-tailed P value <0.05 was  
7  
8  
9 159 considered statistically significant. All statistical analyses were performed with STATA,  
10  
11  
12 160 version 12.1 (StataCorp, College Station, TX, USA).

13  
14  
15 161

## 162 **RESULTS**

163 The prevalence of MetS was 18.5% in men and 12.8 % in women. **Table 1**  
164 shows characteristics of the study participants across categories of eating rate. Men who  
165 ate fast tended to be young, whereas women who ate slowly tended to be young. Both  
166 men and women who ate fast consumed greater amount of alcohol and had significantly  
167 higher BMI, waist circumference, triglyceride level and systolic and diastolic blood  
168 pressures and lower HDL-C level than those who ate slowly.

169 The ORs of the presence of MetS across eating rate are shown in **Table 2**.  
170 Faster eating was associated with higher presence of MetS in age- and  
171 multivariable-adjusted models. The trend was more apparent in men than in women.  
172 The multivariable-adjusted ORs (95% CI) of MetS for eating slow, normal and fast rate  
173 were 0.70 (0.62 to 0.79), 1.00 (reference) and 1.61 (1.53 to 1.70), respectively, in men  
174 (P for trend <0.001), and 0.74 (0.60 to 0.91), 1.00 (reference) and 1.27 (1.13 to 1.43),  
175 respectively, in women (P for trend <0.001). Further adjustment for BMI markedly

1  
2  
3  
4  
5  
6 176 attenuated these associations; however, the association with fast eating and MetS  
7  
8  
9 177 remained statistically significant in men.

10  
11 **Table 3** shows the ORs of the presence of individual MetS components across  
12  
13  
14  
15 179 three categories of eating rate. Central obesity sharply increased with increasing speed  
16  
17  
18 180 of eating; the ORs for slow, normal and fast eating were 0.63, 1.00 (reference) and 1.97,  
19  
20  
21 181 respectively, in men (P for trend <0.001), and 0.73, 1.00(reference) and 1.44,  
22  
23  
24 182 respectively, in women (P for trend <0.001). High blood pressure and high triglyceride  
25  
26  
27 183 were positively associated with eating rate in both men and women. High fasting plasma  
28  
29  
30 184 glucose and low HDL-C were associated with fast eating in both men and women, but  
31  
32  
33 185 they were associated with slow eating in men only. Additional adjustment for BMI  
34  
35  
36 186 largely attenuated these associations and the significant trend association disappeared,  
37  
38  
39 187 but the associations of slow eating with decreased odds of high blood pressure (men and  
40  
41  
42 188 women) and hyperglycemia (men) and those of fast eating with increased odds of  
43  
44  
45 189 abnormal lipid profile (men) remained statistically significant.

46  
47 190

## 48 49 191 **DISCUSSION**

50  
51  
52 192 In this large population of Japanese men and women, we found that eating rate  
53  
54  
55 193 was positively associated with the presence of MetS, especially in men. Of components  
56  
57  
58  
59  
60

1  
2  
3  
4  
5  
6 194 of MetS, the association with abdominal obesity was strongest. These associations were  
7  
8  
9 195 largely attenuated after adjustment for BMI. However, slow eating was associated with  
10  
11  
12 196 decreased odds of high blood pressure in both men and women and high fasting plasma  
13  
14  
15 197 glucose in men, and fast eating was associated with increased odds of lipid abnormal  
16  
17  
18 198 profiles in men. To our best knowledge, the present study is the first to report a positive  
19  
20  
21 199 association between eating rate and MetS defined by using waist circumference.  
22

23  
24 200 The present finding for MetS is consistent with that of a study among Korean  
25  
26 201 men reporting that eating rate was positively associated with MetS, which was defined  
27  
28  
29 202 by using BMI instead of waist circumference.<sup>20</sup> As regards MetS components, our study  
30  
31  
32 203 is compatible with some cross-sectional studies showing that eating rate was associated  
33  
34  
35 204 with higher BMI<sup>8-11</sup> and two longitudinal studies showing that eating rate was  
36  
37  
38 205 associated with weight gain.<sup>16, 17</sup> In a Korean study that elucidated the association  
39  
40  
41 206 between eating rate and components of MetS for men and women separately, eating rate  
42  
43  
44 207 was associated with obesity, high blood pressure, hyperglycemia and abnormal lipid  
45  
46  
47 208 profile in men, whereas it was associated with only obesity in women.<sup>11</sup> Our results  
48  
49  
50 209 were largely consistent with those in the Korean study (except for blood pressure in  
51  
52  
53 210 women).  
54  
55  
56  
57  
58  
59  
60



1  
2  
3  
4  
5  
6 211 Notably, we found that the associations of MetS components with eating rate  
7  
8  
9 212 were largely attenuated after adjustment for BMI, a finding compatible with those of a  
10  
11  
12 213 cross-sectional study in Korea<sup>11</sup> and a prospective study in Japan.<sup>18</sup> This result indicates  
13  
14  
15 214 that obesity is a mediator whereby fast eating deteriorates MetS components. We also  
16  
17  
18 215 found, however, that some associations remained statistically significant even after  
19  
20  
21 216 adjusting for BMI (dyslipidemia with fast eating and hyperglycemia with slow eating in  
22  
23  
24 217 men, and high blood pressure with slow eating in both men and women). Similarly, the  
25  
26  
27 218 above-mentioned Korean study<sup>11</sup> reported that high rate of eating remained an important  
28  
29  
30 219 determinant for low HDL-C and high fasting plasma glucose after adjustment for BMI  
31  
32  
33 220 in men. Therefore, there may be pathways other than weight gain that might underlie the  
34  
35  
36 221 association between eating rate and MetS.

37  
38 222 We found that the association between eating rate and MetS was stronger in  
39  
40  
41 223 men than in women, consistent with a previous study in Korea.<sup>11</sup> Such sex difference  
42  
43  
44 224 may reflect the difference in actual eating speed between men and women. One study  
45  
46  
47 225 elucidated that women took more bites, smaller bite size and slower bites than men in  
48  
49  
50 226 eating the same amount of doughnut, irrespectively of body size.<sup>27</sup> Another study  
51  
52  
53 227 showed that objectively measured eating speed in men with self-reported slow eating  
54  
55  
56  
57  
58  
59  
60

1  
2  
3  
4  
5  
6 228 was faster than that in women with self-reported fast eating.<sup>28</sup> Taken together, eating  
7  
8  
9 229 rate may have a greater impact on metabolism in men than that in women.

10  
11  
12 230 Although mechanisms whereby eating rate influences metabolism is not fully  
13  
14  
15 231 elucidated, overeating may link fast eating to MetS. Fast eating gives few satiety signal  
16  
17  
18 232 from oral cavity to the brain,<sup>29, 30</sup> induces less satiation and satiety due to a lack of  
19  
20  
21 233 stomach expansion<sup>31</sup> and alters the circulating levels of certain gut hormones.<sup>32, 33</sup> In  
22  
23  
24 234 these pathways, fast eating leads to excess energy intake,<sup>34, 35</sup> resulting in overweight  
25  
26  
27 235 and MetS. Because fast eating has been associated with obesity even after adjusting for  
28  
29  
30 236 total energy intake,<sup>8-11, 14</sup> there may be other pathways. One study showed that  
31  
32  
33 237 interleukin-1 $\beta$  and interleukin-6 were higher among those who ate fast than among  
34  
35  
36 238 those who ate slowly, even after accounting for energy intake and BMI.<sup>36</sup> These  
37  
38  
39 239 cytokines could induce insulin resistance,<sup>37, 38</sup> contributing to high blood pressure via an  
40  
41  
42 240 increased renal sodium and water retention, plasma noradrenalin and sympathetic  
43  
44  
45 241 nervous system activity.<sup>39-41</sup>

46  
47 242 The strengths of our study deserve mention. The present study has large sample  
48  
49  
50 243 size (56,865 participants). In addition, body weight, body height and waist  
51  
52  
53 244 circumference were measured by trained technicians, which increased the validity of our  
54  
55  
56 245 study. Nonetheless, several limitations in the present study merit consideration. First,

1  
2  
3  
4  
5  
6 246 eating rate was self-reported. However, self-reported eating rate has been shown to be  
7  
8  
9 247 well correlated with friend-reported one<sup>9</sup> or objectively measured one.<sup>28</sup> Second,  
10  
11  
12 248 information on dietary intake was not available in the present study and thus total  
13  
14  
15 249 energy intake was not considered in analyses. The adjustment of energy intake, however,  
16  
17  
18 250 may not be appropriate because energy intake may increase with eating rate and thus  
19  
20  
21 251 may act as a mediator rather than confounder. Moreover, eating rate has been associated  
22  
23  
24 252 with body weight independent of energy intake.<sup>7-10,13</sup> Third, fast-food is an energy-dense  
25  
26  
27 253 dietary source and has been linked to MetS.<sup>42</sup> Because fast-food is usually consumed  
28  
29  
30 254 quickly, it may confound the association of eating rate with MetS. Fourth, the study  
31  
32  
33 255 participants were mainly workers in various industries including manufacturing (43.6%),  
34  
35  
36 256 service (27.8%) and transport and telecommunications (9.9%), and these figures are  
37  
38  
39 257 similar to those of national survey.<sup>43</sup> However, information on profession of participants  
40  
41  
42 258 was not available, and thus caution is required when generalize the present finding.  
43  
44  
45 259 Fifth, a large number of participants were excluded from the present analysis due to  
46  
47  
48 260 missing data for MetS components. We cannot deny a possibility of bias due to such  
49  
50  
51 261 selective inclusion. Sixth, cross-sectional design precludes any causal inferences about  
52  
53  
54 262 the role of eating rate. Finally, we cannot exclude a possibility of the effects of residual  
55  
56  
57 263 confounding and confounding by unmeasured variables.  
58  
59  
60

1  
2  
3  
4  
5  
6 264 In conclusion, we found a positive trend association between self-reported  
7  
8  
9 265 eating rate and the presence of MetS in men and women. The association between  
10  
11 266 eating rate and MetS was largely accounted for by the difference of body mass across  
12  
13  
14 267 eating rate. Further research should address whether reducing eating rate prevents  
15  
16  
17  
18 268 obesity and MetS.  
19  
20  
21  
22  
23  
24  
25  
26  
27  
28  
29  
30  
31  
32  
33  
34  
35  
36  
37  
38  
39  
40  
41  
42  
43  
44  
45  
46  
47  
48  
49  
50  
51  
52  
53  
54  
55  
56  
57  
58  
59  
60

Table 1. Characteristics of the study individuals according to eating rates

|                                     | Men (n = 41,820) |               |               | P for trend <sup>a</sup> | Women (n = 15,045) |              |              | P for trend <sup>a</sup> |
|-------------------------------------|------------------|---------------|---------------|--------------------------|--------------------|--------------|--------------|--------------------------|
|                                     | Slow             | Normal        | Fast          |                          | Slow               | Normal       | Fast         |                          |
| n (%)                               | 2,821 (6.8)      | 24,893 (59.5) | 14,106 (33.7) |                          | 1,398 (9.3)        | 9,893 (65.8) | 3,754 (24.9) |                          |
| Age (years) <sup>b</sup>            | 46.9 ± 12.3      | 46.9 ± 10.9   | 45.0 ± 10.4   | <0.001                   | 43.5 ± 12.5        | 47.2 ± 11.6  | 46.7 ± 11.2  | <0.001                   |
| Walking time, ≥60 min/day (%)       | 21.8             | 19.0          | 20.6          | 0.004                    | 15.5               | 15.0         | 16.1         | 0.798                    |
| Smoking status (%)                  |                  |               |               |                          |                    |              |              |                          |
| Non-smoker                          | 61.9             | 55.0          | 56.6          | <0.001                   | 82.9               | 83.1         | 80.7         | 0.572                    |
| Daily consuming <20 cigarettes /day | 28.6             | 34.6          | 31.3          |                          | 16.0               | 15.7         | 17.6         |                          |
| Daily consuming ≥20 cigarettes /day | 9.5              | 10.4          | 12.1          |                          | 1.1                | 1.2          | 1.7          |                          |

## Alcohol (%)

|                                               |                     |                     |                     |        |                     |                     |                     |        |
|-----------------------------------------------|---------------------|---------------------|---------------------|--------|---------------------|---------------------|---------------------|--------|
| Non-drinker                                   | 30.2                | 26.7                | 26.7                | <0.001 | 53.4                | 52.2                | 49.8                | <0.001 |
| Drinker <1 go /day <sup>d</sup>               | 33.9                | 35.7                | 34.5                |        | 34.2                | 35.9                | 35.5                |        |
| Drinker 1 to <2 go /day <sup>d</sup>          | 24.6                | 26.3                | 26.8                |        | 9.5                 | 9.5                 | 11.5                |        |
| Drinker ≥2 go /day <sup>d</sup>               | 11.3                | 11.3                | 12.0                |        | 2.9                 | 2.4                 | 3.2                 |        |
| BMI (kg/m <sup>2</sup> ) <sup>b</sup>         | 22.4 ± 3.3          | 23.4 ± 3.3          | 24.6 ± 3.7          | <0.001 | 21.0 ± 3.5          | 21.8 ± 3.5          | 22.5 ± 3.8          | <0.001 |
| Waist circumference (cm) <sup>b</sup>         | 80.3 ± 9.2          | 82.9 ± 9.0          | 86.0 ± 9.8          | <0.001 | 75.5 ± 9.5          | 77.7 ± 9.4          | 79.6 ± 9.8          | <0.001 |
| Systolic blood pressure (mm Hg) <sup>b</sup>  | 123.5 ± 15.5        | 126.1 ± 15.5        | 126.7 ± 15.1        | <0.001 | 113.1 ± 16.3        | 117.3 ± 17.2        | 117.0 ± 17.2        | <0.001 |
| Diastolic blood pressure (mm Hg) <sup>b</sup> | 75.2 ± 11.4         | 77.3 ± 11.9         | 78.0 ± 12.0         | <0.001 | 69.1 ± 10.9         | 71.4 ± 11.5         | 71.5 ± 11.9         | <0.001 |
| Fasting plasma glucose (mg/dL) <sup>c</sup>   | 93.0 (92.5 to 93.6) | 94.4 (94.2 to 94.6) | 94.6 (94.3 to 94.8) | <0.001 | 88.1 (87.5 to 88.7) | 89.1 (88.9 to 89.3) | 89.5 (89.1 to 89.9) | <0.001 |

1  
2  
3  
4  
5  
6  
7  
8  
9  
10  
11  
12  
13  
14  
15  
16  
17  
18  
19  
20  
21  
22  
23  
24  
25  
26  
27  
28  
29  
30  
31  
32  
33  
34  
35  
36  
37  
38  
39  
40  
41  
42  
43  
44  
45  
46  
47  
48  
49

|                                   |                      |                        |                        |        |                     |                     |                     |        |
|-----------------------------------|----------------------|------------------------|------------------------|--------|---------------------|---------------------|---------------------|--------|
| Triglyceride (mg/dL) <sup>c</sup> | 98.3 (96.2 to 103.8) | 103.8 (103.0 to 110.8) | 110.8 (109.8 to 111.9) | <0.001 | 67.0 (65.3 to 68.7) | 71.6 (70.9 to 72.3) | 74.1 (72.9 to 75.2) | <0.001 |
| HDL-C (mg/dL) <sup>b</sup>        | 61.3 ± 15.3          | 59.4 ± 15.0            | 57.2 ± 14.3            | <0.001 | 71.4 ± 15.3         | 70.5 ± 15.8         | 69.3 ± 15.5         | <0.001 |

Cross to sectional survey of 56,865 examinees in All Japan Labor Welfare Foundation, Japan, 2011.

BMI=body mass index; HDL-C=high to density lipoprotein cholesterol.

<sup>a</sup> Linear regression and logistic regression, assigning ordinal number (0 to 2) to eating rate, as appropriate.

<sup>b</sup> Mean ± SD.

<sup>c</sup> Geometric means (95% confidence intervals).

<sup>d</sup> One *go* contains ~25g of ethanol.

Table 2. Odds ratios and 95% confidence intervals for metabolic syndrome according to eating rate (n = 56,865)

| Eating rate          | Men (n = 41,820)    |                     |                     | P for trend <sup>b</sup> | Women (n = 15,045)  |                     |                     | P for trend <sup>b</sup> |
|----------------------|---------------------|---------------------|---------------------|--------------------------|---------------------|---------------------|---------------------|--------------------------|
|                      | Slow                | Normal <sup>a</sup> | Fast                |                          | Slow                | Normal <sup>a</sup> | Fast                |                          |
| n (%)                | 2,821 (6.8)         | 24,893 (59.5)       | 14,106 (33.7)       |                          | 1,398 (9.3)         | 9,893 (65.8)        | 3,754 (24.9)        |                          |
| MetS, n              | 361                 | 4,180               | 3,193               |                          | 116                 | 1,261               | 547                 |                          |
| Model 1 <sup>c</sup> | 0.70 (0.62 to 0.79) | 1.00                | 1.62 (1.53 to 1.71) | <0.001                   | 0.75 (0.61 to 0.92) | 1.00                | 1.27 (1.13 to 1.42) | <0.001                   |
| Model 2 <sup>d</sup> | 0.70 (0.62 to 0.79) | 1.00                | 1.61 (1.53 to 1.70) | <0.001                   | 0.74 (0.60 to 0.91) | 1.00                | 1.27 (1.13 to 1.43) | <0.001                   |
| Model 3 <sup>e</sup> | 0.91 (0.80 to 1.04) | 1.00                | 1.10 (1.03 to 1.17) | <0.001                   | 0.88 (0.70 to 1.11) | 1.00                | 0.98 (0.86 to 1.12) | 0.714                    |

MetS=Metabolic syndrome.



1  
2  
3  
4  
5  
6  
7 MetS as defined using the criteria of the Joint Interim Statement : the presence of three or more of the following risk factors: 1) waist circumference  $\geq 90$  cm  
8  
9  
10 in men and  $\geq 80$  cm in women, 2) triglyceride level  $\geq 150$  mg/dL (1.7 mmol/L), 3) HDL-C level  $< 40$  mg/dL (1.04 mmol/L) in men and  $< 50$  mg/dL (1.3  
11  
12 mmol/L) in women, 4) blood pressure  $\geq 130$  mm Hg systolic or  $\geq 85$  mm Hg diastolic, 5) fasting glucose level  $\geq 100$  mg/dL (5.6 mmol/L).  
13  
14

15  
16 <sup>a</sup> Reference.

17  
18  
19 <sup>b</sup> Multiple logistic regression, assigning ordinal number (0 to 2) to eating rate.

20  
21  
22 <sup>c</sup> Adjusted for age.

23  
24  
25 <sup>d</sup> Adjusted for age, smoking status, alcohol and regular physical activity.

26  
27  
28 <sup>e</sup> Adjusted for age, smoking status, alcohol, regular physical activity and body mass index.  
29  
30  
31  
32  
33  
34  
35  
36  
37  
38  
39  
40  
41  
42  
43  
44  
45  
46  
47  
48  
49

Table 3. Odds ratios and 95% confidence intervals for components of metabolic syndrome according to eating rate (n = 56,865)

| Eating rate                  | Men (n = 41,820)    |                     |                     | P for trend <sup>b</sup> | Women (n = 15,045)  |                     |                     | P for trend <sup>b</sup> |
|------------------------------|---------------------|---------------------|---------------------|--------------------------|---------------------|---------------------|---------------------|--------------------------|
|                              | Slow                | Normal <sup>a</sup> | Fast                |                          | Slow                | Normal <sup>a</sup> | Fast                |                          |
| n (%)                        | 2,821 (6.8)         | 24,893 (59.5)       | 14,106 (33.7)       |                          | 1,398 (9.3)         | 9,893 (65.8)        | 3,754 (24.9)        |                          |
| Central obesity <sup>c</sup> |                     |                     |                     |                          |                     |                     |                     |                          |
| Model 1 <sup>d</sup>         | 0.63 (0.56 to 0.71) | 1.00                | 1.98 (1.89 to 2.08) | <0.001                   | 0.73 (0.64 to 0.83) | 1.00                | 1.44 (1.34 to 1.56) | <0.001                   |
| Model 2 <sup>e</sup>         | 0.63 (0.56 to 0.70) | 1.00                | 1.97 (1.88 to 2.07) | <0.001                   | 0.73 (0.64 to 0.83) | 1.00                | 1.44 (1.33 to 1.56) | <0.001                   |

1  
2  
3  
4  
5  
6  
7  
8  
9  
10  
11  
12  
13  
14  
15  
16  
17  
18  
19  
20  
21  
22  
23  
24  
25  
26  
27  
28  
29  
30  
31  
32  
33  
34  
35  
36  
37  
38  
39  
40  
41  
42  
43  
44  
45  
46  
47  
48  
49

High blood pressure <sup>f</sup>

|                      |      |                |      |                |        |      |                |      |                |        |
|----------------------|------|----------------|------|----------------|--------|------|----------------|------|----------------|--------|
| Model 1 <sup>d</sup> | 0.75 | (0.69 to 1.00) | 1.22 | (1.17 to 1.27) | <0.001 | 0.76 | (0.66 to 1.00) | 1.10 | (1.01 to 1.21) | <0.001 |
| Model 2 <sup>e</sup> | 0.74 | (0.68 to 1.00) | 1.20 | (1.15 to 1.26) | <0.001 | 0.76 | (0.65 to 1.00) | 1.10 | (1.00 to 1.20) | <0.001 |
| Model 3 <sup>g</sup> | 0.88 | (0.81 to 1.00) | 0.97 | (0.93 to 1.02) | 0.645  | 0.85 | (0.72 to 1.00) | 0.93 | (0.84 to 1.02) | 0.923  |

High fasting plasma glucose <sup>h</sup>

|                      |      |                |      |                |        |      |                |      |                |       |
|----------------------|------|----------------|------|----------------|--------|------|----------------|------|----------------|-------|
| Model 1 <sup>d</sup> | 0.78 | (0.71 to 1.00) | 1.17 | (1.12 to 1.23) | <0.001 | 1.03 | (0.85 to 1.00) | 1.17 | (1.04 to 1.31) | 0.035 |
| Model 2 <sup>e</sup> | 0.78 | (0.71 to 1.00) | 1.16 | (1.11 to 1.23) | <0.001 | 1.03 | (0.85 to 1.00) | 1.16 | (1.03 to 1.31) | 0.042 |

|                                |                     |  |                     |        |                     |      |                      |
|--------------------------------|---------------------|--|---------------------|--------|---------------------|------|----------------------|
|                                | 0.87)               |  | 1.22)               | 1      | 1.25)               |      | 1.31)                |
| Model 3 <sup>g</sup>           | 0.88 (0.80 to 1.00) |  | 0.99 (0.94 to 1.05) | 0.238  | 1.14 (0.94 to 1.40) | 1.00 | 1.02 (0.90 to 0.536) |
| High triglyceride <sup>i</sup> |                     |  |                     |        |                     |      |                      |
| Model 1 <sup>d</sup>           | 0.88 (0.80 to 1.00) |  | 1.32 (1.26 to 1.38) | <0.001 | 0.83 (0.67 to 1.01) | 1.00 | 1.14 (1.01 to 0.002) |
| Model 2 <sup>e</sup>           | 0.90 (0.82 to 1.00) |  | 1.33 (1.27 to 1.39) | <0.001 | 0.81 (0.66 to 1.00) | 1.00 | 1.13 (1.01 to 0.002) |
| Model 3 <sup>g</sup>           | 1.08 (0.98 to 1.00) |  | 1.07 (1.02 to 1.12) | 0.121  | 0.90 (0.73 to 1.11) | 1.00 | 0.98 (0.87 to 0.753) |
| Low HDL-C <sup>j</sup>         |                     |  |                     |        |                     |      |                      |

|                      |                     |                     |        |                     |                     |       |
|----------------------|---------------------|---------------------|--------|---------------------|---------------------|-------|
| Model 1 <sup>d</sup> | 0.83 (0.73 to 1.00) | 1.34 (1.26 to 1.43) | <0.001 | 0.90 (0.74 to 1.00) | 1.11 (0.99 to 1.25) | 0.018 |
| Model 2 <sup>e</sup> | 0.83 (0.73 to 1.00) | 1.36 (1.28 to 1.45) | <0.001 | 0.89 (0.74 to 1.00) | 1.12 (1.00 to 1.26) | 0.011 |
| Model 3 <sup>g</sup> | 0.97 (0.84 to 1.00) | 1.10 (1.03 to 1.18) | 0.004  | 1.00 (0.82 to 1.22) | 0.96 (0.85 to 1.08) | 0.500 |

BMI=body mass index; HDL-C=high to density lipoprotein cholesterol.

<sup>a</sup> Reference.

<sup>b</sup> Multiple logistic regression, assigning ordinal number (0 to 2) to eating rate.

<sup>c</sup> Waist circumference  $\geq 90$  cm in men and  $\geq 80$  cm in women.

<sup>d</sup> Adjusted for age.

<sup>e</sup> Adjusted for age, smoking status, alcohol and regular physical activity.

1  
2  
3  
4  
5  
6  
7 <sup>f</sup> Blood pressure  $\geq 130$  mm Hg for systolic or  $\geq 85$  mm Hg for diastolic.  
8

9  
10 <sup>g</sup> Adjusted for age, smoking status, alcohol, regular physical activity and body mass index.  
11

12  
13 <sup>h</sup> Fasting plasma glucose  $\geq 100$  mg/dL or under medication.  
14

15  
16 <sup>i</sup> Triglyceride  $\geq 150$  mg/dL or under medication.  
17

18  
19 <sup>j</sup> HDL-C  $< 40$  mg/dL in men,  $< 50$  mg/dL in women or under medication.  
20  
21  
22  
23  
24  
25  
26  
27  
28  
29  
30  
31  
32  
33  
34  
35  
36  
37  
38  
39  
40  
41  
42  
43  
44  
45  
46  
47  
48  
49

## Acknowledgments

The authors would like to thank Dr. Nobuo Yanagisawa and Dr. Takeshi Kawaguchi for their coordinating the study.

**Contributors:** SN and KKurotani designed study and drafted the manuscript. SN, NMP, AN, KKuwahara performed the data analysis. MD collected and interpreted the data. All authors have participated in the interpretation of the findings, revised it critically for important intellectual content and approved final version to be published. TM and YN provided administrative, technical and material support. SN and TM are guarantors.

**Funding:** This study was supported by the Industrial Health Foundation.

**Competing interests:** All authors have completed the ICMJE uniform disclosure form at [www.icmje.org/coi\\_disclosure.pdf](http://www.icmje.org/coi_disclosure.pdf) and declare: all authors declare no interests.

**Ethical approval:** The research protocol was approved by the Ethics Committee of the National Center for Global Health and Medicine and the Ethics Committee of Toho University.

**Data sharing:** No additional data available.

**Transparency:** SN affirms that the manuscript is an honest, accurate, and transparent account of the study being reported; that no important aspects of the study have been omitted; and that any discrepancies from the study as planned (and, if relevant,

1  
2  
3  
4  
5  
6 registered) have been explained.  
7  
8  
9  
10  
11  
12  
13  
14  
15  
16  
17  
18  
19  
20  
21  
22  
23  
24  
25  
26  
27  
28  
29  
30  
31  
32  
33  
34  
35  
36  
37  
38  
39  
40  
41  
42  
43  
44  
45  
46  
47  
48  
49  
50  
51  
52  
53  
54  
55  
56  
57  
58  
59  
60

For peer review only



## References

1. Eckel RH, Alberti KG, Grundy SM, et al. The metabolic syndrome. *Lancet* 2010;**375**:181-83.
2. Gomez-Martinez S, Martinez-Gomez D, Perez de Heredia F, et al. Eating habits and total and abdominal fat in Spanish adolescents: influence of physical activity. The AVENA study. *J Adolesc Health* 2012;**50**:403-09.
3. Ilanne-Parikka P, Eriksson JG, Lindstrom J, et al. Effect of lifestyle intervention on the occurrence of metabolic syndrome and its components in the Finnish Diabetes Prevention Study. *Diabetes care* 2008;**31**:805-07.
4. Nanri A, Tomita K, Matsushita Y, et al. Effect of six months lifestyle intervention in Japanese men with metabolic syndrome: randomized controlled trial. *J Occup Health* 2012;**54**:215-22.
5. Ferster CB, Nurnberger JI, Levitt EB. The control of eating. 1962. *Obes Res* 1996;**4**:401-10.
6. Hill SW, McCutcheon NB. Eating responses of obese and nonobese humans during dinner meals. *Psychosom Med* 1975;**37**:395-401.
7. Bellack AS. Behavior therapy for weight reduction. *Addict Behav* 1975;**1**:73-82.
8. Otsuka R, Tamakoshi K, Yatsuya H, et al. Eating fast leads to obesity: findings based

1  
2  
3  
4  
5  
6 on self-administered questionnaires among middle-aged Japanese men and women. *J*  
7  
8  
9 *Epidemiol* 2006;**16**:117-24.

10  
11 9. Sasaki S, Katagiri A, Tsuji T, et al. Self-reported rate of eating correlates with body  
12  
13 mass index in 18-y-old Japanese women. *Int J Obes Relat Metab Disord*  
14  
15 2003;**27**:1405-10.  
16  
17

18  
19 10. Maruyama K, Sato S, Ohira T, et al. The joint impact on being overweight of self  
20  
21 reported behaviours of eating quickly and eating until full: cross sectional survey. *BMJ*  
22  
23 2008;**337**:a2002.  
24  
25  
26

27  
28 11. Lee KS, Kim DH, Jang JS, et al. Eating rate is associated with cardiometabolic risk  
29  
30 factors in Korean adults. *Nut Metab Cardiovasc Dis* 2013;**23**:635-41.  
31  
32

33  
34 12. Otsuka R, Tamakoshi K, Yatsuya H, et al. Eating fast leads to insulin resistance:  
35  
36 findings in middle-aged Japanese men and women. *Prev Med* 2008;**46**:154-59.  
37  
38

39  
40 13. Radzeviciene L, Ostrauskas R. Fast eating and the risk of type 2 diabetes mellitus: a  
41  
42 case-control study. *Clin Nutr* 2013;**32**:232-35.  
43  
44

45  
46 14. Ohkuma T, Fujii H, Iwase M, et al. Impact of eating rate on obesity and  
47  
48 cardiovascular risk factors according to glucose tolerance status: the Fukuoka Diabetes  
49  
50 Registry and the Hisayama Study. *Diabetologia* 2013;**56**:70-77.  
51  
52

53  
54 15. Shigeta H, Shigeta M, Nakazawa A, et al. Lifestyle, obesity, and insulin resistance.  
55  
56  
57  
58  
59  
60

1  
2  
3  
4  
5  
6 *Diabetes care* 2001;**24**:608.  
7

8  
9 16. Gerace TA, George VA. Predictors of weight increases over 7 years in fire fighters  
10  
11 and paramedics. *Prev Med* 1996;**25**:593-600.  
12

13  
14 17. Tanihara S, Imatoh T, Miyazaki M, et al. Retrospective longitudinal study on the  
15  
16 relationship between 8-year weight change and current eating speed. *Appetite*  
17  
18 2011;**57**:179-83.  
19  
20

21  
22 18. Sakurai M, Nakamura K, Miura K, et al. Self-reported speed of eating and 7-year  
23  
24 risk of type 2 diabetes mellitus in middle-aged Japanese men. *Metabolism*  
25  
26 2012;**61**:1566-71.  
27  
28

29  
30 19. Kral JG, Buckley MC, Kissileff HR, et al. Metabolic correlates of eating behavior in  
31  
32 severe obesity. *Int J Obes Relat Metab Disord* 2001;**25**:258-64.  
33  
34

35  
36 20. Shin A, Lim SY, Sung J, et al. Dietary intake, eating habits, and metabolic syndrome  
37  
38 in Korean men. *J Am Diet Assoc* 2009;**109**:633-40.  
39  
40

41  
42 21. Shen W, Punyanitya M, Chen J, et al. Waist circumference correlates with metabolic  
43  
44 syndrome indicators better than percentage fat. *Obesity (Silver Spring)* 2006;**14**:727-36.  
45  
46

47  
48 22. Alberti KG, Eckel RH, Grundy SM, et al. Harmonizing the metabolic syndrome: a  
49  
50 joint interim statement of the International Diabetes Federation Task Force on  
51  
52 Epidemiology and Prevention; National Heart, Lung, and Blood Institute; American  
53  
54  
55  
56  
57  
58  
59  
60

1  
2  
3  
4  
5  
6 Heart Association; World Heart Federation; International Atherosclerosis Society; and  
7  
8  
9 International Association for the Study of Obesity. *Circulation* 2009;**120**:1640-5.

10  
11  
12 23. Ministry of Justice, Japan. Industrial Safety and Health Act, Article 66 (Medical  
13  
14 Examination). Available at:

15  
16  
17 <http://www.japaneselawtranslation.go.jp/law/detail/?id=1926&vm=&re=>. Accessed 28  
18  
19  
20 July 2014.

21  
22  
23 24. Ministry of Health, Labour and Welfare. Specific Health Checkups and Specific  
24  
25 Health Guidance. Secondary Specific Health Checkups and Specific Health Guidance.

26  
27 Available at: <http://www.mhlw.go.jp/english/wp/wp-hw3/dl/2-007.pdf>. Accessed 28

28  
29  
30 July 2014.25. The Ministry of Health, Labour and Welfare, Ministry of Education,

31  
32  
33 Culture, Sports, Science and Technology. Ethical guidelines for epidemiological

34  
35  
36 research. 2002. Available at: <http://www.niph.go.jp/wadai/ekigakurinri/guidelines.pdf>.

37  
38  
39 Accessed 28 July, 2014.

40  
41  
42 26. Ministry of Health, Labour and Welfare. Questionnaire of Specific Health Checkups.

43  
44  
45  
46  
47 Secondary Questionnaire of Specific Health Checkups. Available at:

48  
49  
50 [http://www.mhlw.go.jp/seisakunitsuite/bunya/kenkou\\_iryuu/kenkou/seikatsu/dl/hoken-p](http://www.mhlw.go.jp/seisakunitsuite/bunya/kenkou_iryuu/kenkou/seikatsu/dl/hoken-p)

51  
52  
53 [rogram2\\_02.pdf](http://www.mhlw.go.jp/seisakunitsuite/bunya/kenkou_iryuu/kenkou/seikatsu/dl/hoken-p). Accessed 28 July 2014. (in Japanese)

54  
55  
56 27. Hill SW, McCutcheon NB. Contributions of obesity, gender, hunger, food preference,

1  
2  
3  
4  
5  
6 and body size to bite size, bite speed, and rate of eating. *Appetite* 1984;**5**:73-83.  
7

8  
9 28. Ekuni D, Furuta M, Takeuchi N, et al. Self-reports of eating quickly are related to a  
10  
11 decreased number of chews until first swallow, total number of chews, and total  
12  
13 duration of chewing in young people. *Arch Oral Biol* 2012;**57**:981-86.  
14

15  
16  
17 29. Rolls ET. Sensory processing in the brain related to the control of food intake. *Proc*  
18  
19  
20  
21  
22 *Nutr Soc* 2007;**66**:96-112.  
23

24  
25 30. Morton GJ, Cummings DE, Baskin DG, et al. Central nervous system control of  
26  
27 food intake and body weight. *Nature* 2006;**443**:289-95.  
28

29  
30 31. de Graaf C, Blom WA, Smeets PA, et al. Biomarkers of satiation and satiety. *Am J*  
31  
32  
33 *Clin Nutr* 2004;**79**:946-61.  
34

35  
36 32. Kokkinos A, le Roux CW, Alexiadou K, et al. Eating slowly increases the  
37  
38 postprandial response of the anorexigenic gut hormones, peptide YY and glucagon-like  
39  
40 peptide-1. *J Clin Endocrinol Metab* 2010;**95**:333-37.  
41

42  
43 33. Sobki SH, Zaid AA, Khan HA, et al. Significant impact of pace of eating on serum  
44  
45 ghrelin and glucose levels. *Clin Biochem* 2010;**43**:522-24.  
46

47  
48  
49 34. Viskaal-van Dongen M, Kok FJ, de Graaf C. Eating rate of commonly consumed  
50  
51 foods promotes food and energy intake. *Appetite* 2011;**56**:25-31.  
52

53  
54  
55 35. Scisco JL, Muth ER, Dong Y, et al. Slowing bite-rate reduces energy intake: an  
56  
57

- 1  
2  
3  
4  
5  
6 application of the bite counter device. *J Am Diet Assoc* 2011;**111**:1231-35.  
7  
8  
9 36. Mochizuki K, Misaki Y, Miyauchi R, et al. A higher rate of eating is associated with  
10  
11 higher circulating interleukin-1beta concentrations in Japanese men not being treated for  
12  
13 metabolic diseases. *Nutrition* 2012;**28**:978-83.  
14  
15  
16 37. Besedovsky H, del Rey A, Sorkin E, et al. Immunoregulatory feedback between  
17  
18 interleukin-1 and glucocorticoid hormones. *Science* 1986;**233**:652-54  
19  
20  
21 38. Matsuki T, Horai R, Sudo K, et al. IL-1 plays an important role in lipid metabolism  
22  
23 by regulating insulin levels under physiological conditions. *J Exp Med*  
24  
25 2003;**198**:877-88.  
26  
27  
28  
29 39. Yatabe MS, Yatabe J, Yoneda M, et al. Salt sensitivity is associated with insulin  
30  
31 resistance, sympathetic overactivity, and decreased suppression of circulating renin  
32  
33 activity in lean patients with essential hypertension. *Am J Clin Nutr* 2010;**92**:77-82.  
34  
35  
36 40. Facchini FS, DoNascimento C, Reaven GM, et al. Blood pressure, sodium intake,  
37  
38 insulin resistance, and urinary nitrate excretion. *Hypertension* 1999;**33**:1008-12.  
39  
40  
41 41. Pollare T, Lithell H, Berne C. Insulin resistance is a characteristic feature of primary  
42  
43 hypertension independent of obesity. *Metabolism*. 1990;**39**:167-74.  
44  
45  
46 42. De Vogli R, Kouvonen A, Gimeno D. The influence of market deregulation on fast  
47  
48 food consumption and body mass index: a cross national time series analysis. *Bull*  
49  
50  
51  
52  
53  
54  
55  
56  
57  
58  
59  
60

1  
2  
3  
4  
5  
6 *World Health Organ* 2014;**92**:99-107A.  
7

8  
9 43. Ministry of Health, Labour and Welfare. Special Survey on Industrial Safety and  
10  
11 Health. Available at: <http://www.mhlw.go.jp/bunya/roudoukijun/anzeneisei11/h23.html>.  
12  
13

14  
15 Accessed 28 July 2014. (in Japanese)  
16  
17  
18  
19  
20  
21  
22  
23  
24  
25  
26  
27  
28  
29  
30  
31  
32  
33  
34  
35  
36  
37  
38  
39  
40  
41  
42  
43  
44  
45  
46  
47  
48  
49  
50  
51  
52  
53  
54  
55  
56  
57  
58  
59  
60

Or peer review only

1  
2  
3  
4  
5  
6 1 **Self-reported eating rate and metabolic syndrome in Japanese: cross-sectional**  
7  
8  
9 2 **study**

10  
11  
12 3  
13  
14 4 Satsue Nagahama <sup>1 2 3\*</sup>, Kayo Kurotani <sup>1</sup>, Ngoc Minh Pham <sup>4</sup>, Akiko Nanri <sup>1</sup>, Keisuke  
15  
16  
17 5 Kuwahara <sup>1</sup>, Masashi Dan <sup>2</sup>, Yuji Nishiwaki <sup>3</sup>, Tetsuya Mizoue <sup>1</sup>  
18  
19  
20  
21 6

22  
23 7 <sup>1</sup> Department of Epidemiology and Prevention, Center for Clinical Sciences, National  
24  
25  
26 8 Center for Global Health and Medicine, 1-21-1, Toyama, Shinjuku-ku, Tokyo, Japan,  
27  
28  
29 9 Zip162-8655; Tel +81-3-3202-7181, Fax 81-3-3202-7364,  
30  
31  
32 10 E-mail: [satsue\\_0323@hotmail.com](mailto:satsue_0323@hotmail.com)  
33

34  
35 11 <sup>2</sup> All Japan Labor Welfare Foundation, Tokyo, Japan;  
36

37  
38 12 <sup>3</sup> Department of Environmental and Occupational Health, School of Medicine, Toho  
39  
40  
41 13 University, Tokyo, Japan;  
42

43  
44 14 <sup>4</sup> Department of Epidemiology, Faculty of Public Health, Thai Nguyen University of  
45  
46  
47 15 Medicine and Pharmacy, Thai Nguyen Province, Vietnam;  
48

49  
50 16

51  
52 17 Keywords: eating rate, metabolic syndrome, health checkup, Japan, Joint Interim  
53

54  
55 18 Statement  
56  
57  
58  
59  
60



1  
2  
3  
4  
5  
6  
7  
8  
9  
10  
11  
12  
13  
14  
15  
16  
17  
18  
19  
20  
21  
22  
23  
24  
25  
26  
27  
28  
29  
30  
31  
32  
33  
34  
35  
36  
37  
38  
39  
40  
41  
42  
43  
44  
45  
46  
47  
48  
49  
50  
51  
52  
53  
54  
55  
56  
57  
58  
59  
60

19 Word count: 2875

For peer review only

1  
2  
3  
4  
5  
6  
7  
8  
9  
10  
11  
12  
13  
14  
15  
16  
17  
18  
19  
20  
21  
22  
23  
24  
25  
26  
27  
28  
29  
30  
31  
32  
33  
34  
35  
36  
37  
38  
39  
40  
41  
42  
43  
44  
45  
46  
47  
48  
49  
50  
51  
52  
53  
54  
55  
56  
57  
58  
59  
60

20 **ABSTRACT**

21 **Objectives:** To examine the association between self-reported eating rate and metabolic  
22 syndrome.

23 **Design:** Cross-sectional study.

24 **Setting:** Annual health checkup at a health check service center in Japan.

25 **Participants:** A total of 56,865 participants (41,820 males and 15,045 females) who  
26 attended health checkup in 2011 and reported not to have a history of coronary heart  
27 disease or stroke.

28 **Main outcome measure:** Metabolic syndrome was defined by the joint of interim  
29 statement of the International Diabetes Federation and the American Heart  
30 Association/National Heart, Lung, and Blood Institute.

31 **Results:** In multiple logistic regression models, eating rate was significantly and  
32 positively associated with metabolic syndrome. The multivariable-adjusted odds ratios  
33 (95% confidence interval) for slow, normal and fast were 0.70 (0.62 to 0.79), 1.00  
34 (reference) and 1.61 (1.53 to 1.70), respectively, in men (P for trend <0.001), and 0.74  
35 (0.60 to 0.91), 1.00 (reference) and 1.27 (1.13 to 1.43), respectively, in women (P for  
36 trend <0.001). Of metabolic syndrome components, abdominal obesity showed the  
37 strongest association with eating rate. **The associations of eating rate and metabolic**

1  
2  
3  
4  
5  
6 38 syndrome and its components were largely attenuated after further adjustment for body  
7  
8  
9 39 mass index; however, the association of slow eating with lower odds of high blood  
10  
11  
12 40 pressure (men and women) and hyperglycemia (men) and that of fast eating with higher  
13  
14  
15 41 odds of lipid abnormality (men) remained statistically significant.

16  
17  
18 42 **Conclusions:** Results suggest that eating rate is associated with the presence of  
19  
20  
21 43 metabolic syndrome and that this association is largely accounted for by the difference  
22  
23  
24 44 of body mass according to eating rate.

1  
2  
3  
4  
5  
6 45 **Strength and Limitation**  
7

8  
9 46 This study included a large number of participants, used waist circumference in defining  
10  
11  
12 47 metabolic syndrome, and analyzed data for men and women separately.  
13

14  
15 48 Eating rate was assessed by a self-reported questionnaire. Information on dietary intake  
16  
17  
18 49 was not obtained.  
19  
20  
21  
22  
23  
24  
25  
26  
27  
28  
29  
30  
31  
32  
33  
34  
35  
36  
37  
38  
39  
40  
41  
42  
43  
44  
45  
46  
47  
48  
49  
50  
51  
52  
53  
54  
55  
56  
57  
58  
59  
60

1  
2  
3  
4  
5  
6 **50 Introduction**  
7  
8

9  
10  
11  
12  
13  
14  
15  
16  
17  
18  
19  
20  
21  
22  
23  
24  
25  
26  
27  
28  
29  
30  
31  
32  
33  
34  
35  
36  
37  
38  
39  
40  
41  
42  
43  
44  
45  
46  
47  
48  
49  
50  
51  
52  
53  
54  
55  
56  
57  
58  
59  
60  
61  
62  
63  
64  
65  
66  
67  
68  
69  
70

Metabolic syndrome (MetS) is a cluster of physiological risk factors associated with cardiovascular disease and several types of cancer.<sup>1</sup> Determination of etiologic factors for MetS is required for the establishment of public health strategies to reduce its prevalence and prevent resulting complications. Growing evidence from both observational and interventional studies suggests a role of dietary habits in the development of MetS,<sup>2-4</sup> which originates from obesity. Obesity has been extensively investigated in relation to dietary habits including eating rate since 1962, when Ferster published a theoretical and practical weight control program focusing on eating behaviors including eating rate.<sup>5</sup> Observational studies showed that obese people ate at a faster rate than non-obese people,<sup>6</sup> and reducing eating rate may be a simple and effective therapy for obesity.<sup>7</sup>

During the past decade, several cross-sectional studies have found a positive association between eating rate and overweight<sup>8-11</sup> or insulin resistance.<sup>11-15</sup> Similarly, a few longitudinal studies showed that eating fast was associated with an increased risk of weight gain<sup>16, 17</sup> and type 2 diabetes.<sup>18</sup> In addition, some cross-sectional studies have reported that fast eating was positively associated with hypertriglyceridemia and low high-density lipoprotein cholesterol (HDL-C).<sup>11, 14, 19</sup> Therefore it is conceivable that

1  
2  
3  
4  
5  
6 68 eating rate may be associated with MetS. To our knowledge, however, only one Korean  
7  
8  
9 69 study cross-sectionally examined eating rate in relation to MetS.<sup>20</sup> In that study, MetS  
10  
11  
12 70 was defined by using body mass index (BMI), rather than waist circumference, and  
13  
14  
15 71 investigated the association in men only. Waist circumference is a component of most  
16  
17  
18 72 MetS definitions as a surrogate of central obesity, which can better predict  
19  
20  
21 73 cardiovascular risk.<sup>21</sup> It is therefore necessary to examine the relationship between  
22  
23  
24 74 eating rate and MetS using waist circumference in both men and women. Here, we  
25  
26  
27 75 investigated cross-sectionally the association between self-reported eating rate and the  
28  
29  
30 76 presence of MetS according to the joint of interim statement of the International  
31  
32  
33 77 Diabetes Federation and the American Heart Association/National Heart, Lung, and  
34  
35  
36 78 Blood Institute (JIS)<sup>22</sup> using a large dataset of health checkup in Japanese men and  
37  
38  
39 79 women.  
40  
41  
42 80

## 43 44 81 **METHODS AND PROCEDURES**

### 45 46 47 82 **Study population**

48  
49 83 In Japan, health checkup under occupational health and safety law is mandatory  
50  
51  
52 84 for all employed workers<sup>23</sup> and has been modified in 2008 when the recommendation  
53  
54  
55 85 for new national health checkup system focusing on MetS has been launched.<sup>24</sup> Study  
56  
57  
58  
59  
60

1  
2  
3  
4  
5  
6 86 participants were attendants of 2011 (calendar year) annual health checkup at All Japan  
7  
8  
9 87 Labor Welfare Foundation (Tokyo), a health service center performing health checkup.  
10  
11  
12 88 Participants were mainly Japanese employees but also included a small number of their  
13  
14  
15 89 dependents and foreign workers, aged 17-99 in men and 17-85 in women. Of 297,148  
16  
17  
18 90 participants, we excluded 3,660 with a history of myocardial infarction, coronary heart  
19  
20  
21 91 disease or stroke, which might influence both eating rate and MetS. Of the remaining  
22  
23  
24 92 293,488 participants, we included 269,297 who reported their eating rate. Of these, we  
25  
26  
27 93 excluded 182,487 with missing data for any of the components of MetS (173,376  
28  
29  
30 94 without plasma glucose, 61,602 without waist circumference, 43,724 without  
31  
32  
33 95 triglyceride, 43,401 without HDL-C and 504 without blood pressure; some participants  
34  
35  
36 96 had two or more missing data). Major reason for a large number of participants with  
37  
38  
39 97 missing measurement of blood glucose was that HbA1c was measured instead of blood  
40  
41  
42 98 glucose for those who attended checkup in non-fasting condition. Of the remaining  
43  
44  
45 99 86,810 participants, we further excluded 29,337 who took meal within 8 hours before  
46  
47  
48 100 blood drawing or provided no information on meal time. After further exclusion of 608  
49  
50  
51 101 participants with missing information on covariates (BMI, smoking status, alcohol  
52  
53  
54 102 consumption and physical activity), 56,865 participants (41,820 males and 15,045  
55  
56  
57 103 females) remained for analysis. We did not obtain written informed consent from each  
58  
59  
60

1  
2  
3  
4  
5  
6 104 participant; instead, we disclosed the execution of the study by showing posters, giving  
7  
8  
9 105 participants an opportunity to refuse the use of their data for the study. In Japan,  
10  
11  
12 106 informed consent is not necessarily required for observational studies using existing  
13  
14  
15 107 data, as described in the Japanese Ethical Guidelines for Epidemiological Research.<sup>25</sup>  
16

17  
18 108 The research protocol was approved by the Ethics Committee of the National Center for  
19  
20  
21 109 Global Health and Medicine and the Ethics Committee of Toho University.  
22

### 23 110 **Data collection and measurements**

24  
25  
26 111 A self-administered questionnaire, which was recommended for specific health  
27  
28  
29 112 examination by the Japanese government (Ministry of Health, Labour and Welfare),<sup>26</sup>  
30  
31  
32 113 was used to assess eating rate, medical history and health-related lifestyles including  
33  
34  
35 114 smoking, alcohol consumption and regular physical activity. Eating rate was assessed by  
36  
37  
38 115 asking “How fast is your speed of eating?”, with three response options (slow, normal  
39  
40  
41 116 and fast). A trained staff measured height to the nearest 0.1 cm, weight to the nearest 0.1  
42  
43  
44 117 kg and waist circumference to the nearest 0.1 cm at the umbilical level in a standing  
45  
46  
47 118 position. BMI was calculated as the weight in kilograms divided by the squared height  
48  
49  
50 119 in meters. Blood pressure in the sitting position was measured using an automated  
51  
52  
53 120 machine (HEM-907, Omron, Kyoto, Japan). Participants with high blood pressure  
54  
55  
56 121 ( $\geq 130$  mm Hg systolic or  $\geq 85$  mm Hg diastolic) received another measurement and data  
57  
58  
59  
60



1  
2  
3  
4  
5  
6 122 showing lower systolic blood pressure was used. Venous blood sample was collected,  
7  
8  
9 123 stored in a cooler at 4 degrees for transportation to an external laboratory (SRL, Tokyo,  
10  
11  
12 124 Japan) and measured within 24 hours of blood drawing. Triglyceride level was  
13  
14  
15 125 measured by enzymatic colorimetric test (Bio Majesty JCA-BM8060, JEOL, Tokyo,  
16  
17  
18 126 Japan). HDL-C level was determined by a direct method (Bio Majesty JCA-BM8060,  
19  
20  
21 127 JEOL, Tokyo, Japan). Plasma glucose level was determined using by the hexokinase  
22  
23  
24 128 method (an automatic clinical chemistry analyzer JCA-BM9000 series, JEOL, Tokyo,  
25  
26  
27 129 Japan).

### 130 **Definitions for MetS**

131 According to the JIS criteria, MetS was defined as three or more of the  
132 following risk factors: 1) waist circumference for Asian population  $\geq 90$  cm in men and  
133  $\geq 80$  cm in women, 2) triglyceride level  $\geq 150$  mg/dL (1.7 mmol/L), 3) HDL-C level  $< 40$   
134 mg/dL (1.04 mmol/L) in men and  $< 50$  mg/dL (1.3 mmol/L) in women, 4) blood  
135 pressure  $\geq 130$  mm Hg systolic or  $\geq 85$  mm Hg diastolic, 5) fasting glucose level  $\geq 100$   
136 mg/dL (5.6 mmol/L).<sup>22</sup> Participants under medication for diabetes, hypertension and  
137 dyslipidemia were considered as having respective factor, irrespective of measured data.

### 138 **Statistical analysis**

139 Participants were divided into three groups according to eating rate (slow,

1  
2  
3  
4  
5  
6 140 normal and fast). The characteristics of participants across eating rate categories were  
7  
8  
9 141 expressed as means (standard deviation) for continuous variables and percentages for  
10  
11  
12 142 categorical variables, respectively. Fasting plasma glucose and triglyceride were highly  
13  
14  
15 143 skewed; hence, they were log-transformed and expressed as geometric means (95%  
16  
17  
18 144 confidence intervals (CI)). Trend association was assessed by assigning ordinal numbers  
19  
20  
21 145 (0 to 2) to the categories of eating rate (slow, normal and fast, respectively) and was  
22  
23  
24 146 tested using linear regression and logistic regression, as appropriate. Multiple logistic  
25  
26  
27 147 regression analysis was used to estimate the odds ratios (OR) with 95% CI for the  
28  
29  
30 148 presence of MetS across eating rate categories, with normal eating rate as the reference.  
31  
32 149 We adjusted for age (continuous, year) in the basic model. In the second model, we  
33  
34  
35 150 further adjusted for smoking status (non-smoker, daily smoker consuming <20  
36  
37  
38 151 cigarettes per day or  $\geq 20$  cigarettes per day), physical activity (walking time <60 min  
39  
40  
41 152 per day or  $\geq 60$  min per day), and alcohol consumption (non-drinker, <1 go, 1 to <2 go  
42  
43  
44 153 or  $\geq 2$  go per day; one go of sake, Japanese traditional beverage, is about 180 ml of 10 to  
45  
46  
47 154 14% of ethanol and contains  $\sim 23$ g of ethanol). In the third model, we added BMI  
48  
49  
50 155 (continuous,  $\text{kg}/\text{m}^2$ ) to the second model. We performed likelihood ratio test for testing  
51  
52  
53 156 the interaction between eating rate and sex. All analyses were done for men and women  
54  
55  
56 157 separately because the interaction was significant (P for interaction <0.001). We  
57  
58  
59  
60

1  
2  
3  
4  
5  
6 158 repeated the above analyses for each component of MetS. Two-tailed P value <0.05 was  
7  
8  
9 159 considered statistically significant. All statistical analyses were performed with STATA,  
10  
11  
12 160 version 12.1 (StataCorp, College Station, TX, USA).

13  
14  
15 161

## 162 **RESULTS**

163 The prevalence of MetS was 18.5% in men and 12.8 % in women. **Table 1**  
164 shows characteristics of the study participants across categories of eating rate. Men who  
165 ate fast tended to be young, whereas women who ate slowly tended to be young. **Both**  
166 **men and women who ate fast consumed greater amount of alcohol** and had significantly  
167 higher BMI, waist circumference, triglyceride level and systolic and diastolic blood  
168 pressures and lower HDL-C level **than those who ate slowly.**

169 The ORs of the presence of MetS across eating rate are shown in **Table 2.**  
170 Faster eating was associated with higher presence of MetS in age- and  
171 multivariable-adjusted models. The trend was more apparent in men than in women.  
172 The multivariable-adjusted ORs (95% CI) of MetS for eating slow, normal and fast rate  
173 were 0.70 (0.62 to 0.79), 1.00 (reference) and 1.61 (1.53 to 1.70), respectively, in men  
174 (P for trend <0.001), and 0.74 (0.60 to 0.91), 1.00 (reference) and 1.27 (1.13 to 1.43),  
175 respectively, in women (P for trend <0.001). Further adjustment for BMI markedly

1  
2  
3  
4  
5  
6 176 attenuated these associations; however, the association with fast eating and MetS  
7  
8  
9 177 remained statistically significant in men.  
10

11           **Table 3** shows the ORs of the presence of individual MetS components across  
12  
13  
14  
15 179 three categories of eating rate. **Central obesity sharply increased with increasing speed**  
16  
17  
18 180 **of eating; the ORs for slow, normal and fast eating were** 0.63, 1.00 (reference) and 1.97,  
19  
20  
21 181 respectively, in men (P for trend <0.001), and 0.73, 1.00(reference) and 1.44,  
22  
23  
24 182 respectively, in women (P for trend <0.001). High blood pressure and **high** triglyceride  
25  
26  
27 183 were positively associated with eating rate in both **men and women**. High fasting plasma  
28  
29  
30 184 glucose and low HDL-C were associated with **fast** eating in both **men and women**, but  
31  
32  
33 185 they were associated with **slow** eating in men only. Additional adjustment for BMI  
34  
35  
36 186 largely attenuated these associations **and the significant trend association disappeared**,  
37  
38  
39 187 but the associations of slow eating with **decreased odds** of high blood pressure (men and  
40  
41  
42 188 women) and hyperglycemia (men) and those of fast eating with **increased odds of**  
43  
44  
45 189 abnormal lipid profile (men) remained statistically significant.  
46

47 190

## 48 49 191 **DISCUSSION**

50  
51  
52 192           In this large population of Japanese men and women, we found that eating rate  
53  
54  
55 193 was positively associated with the presence of MetS, especially in men. Of components  
56  
57  
58  
59  
60

1  
2  
3  
4  
5  
6 194 of MetS, the association with abdominal obesity was strongest. These associations were  
7  
8  
9 195 largely attenuated after adjustment for BMI. However, slow eating was associated with  
10  
11  
12 196 decreased odds of high blood pressure in both men and women and high fasting plasma  
13  
14  
15 197 glucose in men, and fast eating was associated with increased odds of lipid abnormal  
16  
17  
18 198 profiles in men. To our best knowledge, the present study is the first to report a positive  
19  
20  
21 199 association between eating rate and MetS defined by using waist circumference.

22  
23 200 The present finding for MetS is consistent with that of a study among Korean  
24  
25  
26 201 men reporting that eating rate was positively associated with MetS, which was defined  
27  
28  
29 202 by using BMI instead of waist circumference.<sup>20</sup> As regards MetS components, our study  
30  
31  
32 203 is compatible with some cross-sectional studies showing that eating rate was associated  
33  
34  
35 204 with higher BMI<sup>8-11</sup> and two longitudinal studies showing that eating rate was  
36  
37  
38 205 associated with weight gain.<sup>16, 17</sup> In a Korean study that elucidated the association  
39  
40  
41 206 between eating rate and components of MetS for men and women separately, eating rate  
42  
43  
44 207 was associated with obesity, high blood pressure, hyperglycemia and abnormal lipid  
45  
46  
47 208 profile in men, whereas it was associated with only obesity in women.<sup>11</sup> Our results  
48  
49  
50 209 were largely consistent with those in the Korean study (except for blood pressure in  
51  
52  
53 210 women).

1  
2  
3  
4  
5  
6 211 Notably, we found that the associations of MetS components with eating rate  
7  
8  
9 212 were largely attenuated after adjustment for BMI, a finding compatible with those of a  
10  
11 213 cross-sectional study in Korea<sup>11</sup> and a prospective study in Japan.<sup>18</sup> This result indicates  
12  
13  
14 214 that obesity is a mediator whereby fast eating deteriorates MetS components. We also  
15  
16  
17 215 found, however, that some associations remained statistically significant even after  
18  
19  
20 216 adjusting for BMI (dyslipidemia with fast eating and hyperglycemia with slow eating in  
21  
22  
23 217 men, and high blood pressure with slow eating in both men and women). Similarly, the  
24  
25  
26 218 above-mentioned Korean study<sup>11</sup> reported that high rate of eating remained an important  
27  
28  
29 219 determinant for low HDL-C and high fasting plasma glucose after adjustment for BMI  
30  
31  
32 220 in men. Therefore, there may be pathways other than weight gain that might underlie the  
33  
34  
35 221 association between eating rate and MetS.

36  
37  
38 222 We found that the association between eating rate and MetS was stronger in  
39  
40  
41 223 men than in women, consistent with a previous study in Korea.<sup>11</sup> Such sex difference  
42  
43  
44 224 may reflect the difference in actual eating speed between men and women. One study  
45  
46  
47 225 elucidated that women took more bites, smaller bite size and slower bites than men in  
48  
49  
50 226 eating the same amount of doughnut, irrespectively of body size.<sup>27</sup> Another study  
51  
52  
53 227 showed that objectively measured eating speed in men with self-reported slow eating  
54  
55  
56  
57  
58  
59  
60

1  
2  
3  
4  
5  
6 228 was faster than that in women with self-reported fast eating.<sup>28</sup> Taken together, eating  
7  
8  
9 229 rate may have a greater impact on metabolism in men than that in women.

10  
11  
12 230 Although mechanisms whereby eating rate influences metabolism is not fully  
13  
14  
15 231 elucidated, overeating may link fast eating to MetS. Fast eating gives few satiety signal  
16  
17  
18 232 from oral cavity to the brain,<sup>29, 30</sup> induces less satiation and satiety due to a lack of  
19  
20  
21 233 stomach expansion<sup>31</sup> and alters the circulating levels of certain gut hormones.<sup>32, 33</sup> In  
22  
23  
24 234 these pathways, fast eating leads to excess energy intake,<sup>34, 35</sup> resulting in overweight  
25  
26  
27 235 and MetS. Because fast eating has been associated with obesity even after adjusting for  
28  
29  
30 236 total energy intake,<sup>8-11, 14</sup> there may be other pathways. One study showed that  
31  
32  
33 237 interleukin-1 $\beta$  and interleukin-6 were higher among those who ate fast than among  
34  
35  
36 238 those who ate slowly, even after accounting for energy intake and BMI.<sup>36</sup> These  
37  
38  
39 239 cytokines could induce insulin resistance,<sup>37, 38</sup> contributing to high blood pressure via an  
40  
41  
42 240 increased renal sodium and water retention, plasma noradrenalin and sympathetic  
43  
44  
45 241 nervous system activity.<sup>39-41</sup>

46  
47 242 The strengths of our study deserve mention. The present study has large sample  
48  
49  
50 243 size (56,865 participants). In addition, body weight, body height and waist  
51  
52  
53 244 circumference were measured by trained technicians, which increased the validity of our  
54  
55  
56 245 study. Nonetheless, several limitations in the present study merit consideration. First,

1  
2  
3  
4  
5  
6 246 eating rate was self-reported. However, self-reported eating rate has been shown to be  
7  
8  
9 247 well correlated with friend-reported one<sup>9</sup> or objectively measured one.<sup>28</sup> **Second,**  
10  
11  
12 248 **information on dietary intake was not available in the present study and thus total**  
13  
14  
15 249 **energy intake was not considered in analyses. The adjustment of energy intake, however,**  
16  
17  
18 250 **may not be appropriate because energy intake may increase with eating rate and thus**  
19  
20  
21 251 **may act as a mediator rather than confounder.** Moreover, eating rate has been associated  
22  
23  
24 252 with body weight independent of energy intake.<sup>7-10,13</sup> **Third, fast-food is an energy-dense**  
25  
26  
27 253 **dietary source and has been linked to MetS.<sup>42</sup> Because fast-food is usually consumed**  
28  
29  
30 254 **quickly, it may confound the association of eating rate with MetS. Fourth, the study**  
31  
32  
33 255 participants were mainly workers in various industries including manufacturing (43.6%),  
34  
35  
36 256 service (27.8%) and transport and telecommunications (9.9%), and these figures are  
37  
38  
39 257 similar to those of national survey.<sup>43</sup> However, information on profession of participants  
40  
41  
42 258 was not available, and thus caution is required when generalize the present finding.  
43  
44  
45 259 **Fifth, a large number of participants were excluded from the present analysis due to**  
46  
47  
48 260 **missing data for MetS components. We cannot deny a possibility of bias due to such**  
49  
50  
51 261 **selective inclusion. Sixth, cross-sectional design precludes any causal inferences about**  
52  
53  
54 262 the role of eating rate. Finally, we cannot exclude a possibility of the effects of residual  
55  
56  
57 263 confounding and confounding by unmeasured variables.  
58  
59  
60



1  
2  
3  
4  
5  
6 264 In conclusion, we found a positive trend association between self-reported  
7  
8  
9 265 eating rate and the presence of MetS in men and women. The association between  
10  
11 266 eating rate and MetS was largely accounted for by the difference of body mass across  
12  
13  
14  
15 267 eating rate. Further research should address whether reducing eating rate prevents  
16  
17  
18 268 obesity and MetS.  
19  
20  
21  
22  
23  
24  
25  
26  
27  
28  
29  
30  
31  
32  
33  
34  
35  
36  
37  
38  
39  
40  
41  
42  
43  
44  
45  
46  
47  
48  
49  
50  
51  
52  
53  
54  
55  
56  
57  
58  
59  
60

Table 1. Characteristics of the study individuals according to eating rates

|                                     | Men (n = 41,820) |               |               | P for trend <sup>a</sup> | Women (n = 15,045) |              |              | P for trend <sup>a</sup> |
|-------------------------------------|------------------|---------------|---------------|--------------------------|--------------------|--------------|--------------|--------------------------|
|                                     | Slow             | Normal        | Fast          |                          | Slow               | Normal       | Fast         |                          |
| n (%)                               | 2,821 (6.8)      | 24,893 (59.5) | 14,106 (33.7) |                          | 1,398 (9.3)        | 9,893 (65.8) | 3,754 (24.9) |                          |
| Age (years) <sup>b</sup>            | 46.9 ± 12.3      | 46.9 ± 10.9   | 45.0 ± 10.4   | <0.001                   | 43.5 ± 12.5        | 47.2 ± 11.6  | 46.7 ± 11.2  | <0.001                   |
| Walking time, ≥60 min/day (%)       | 21.8             | 19.0          | 20.6          | 0.004                    | 15.5               | 15.0         | 16.1         | 0.798                    |
| Smoking status (%)                  |                  |               |               |                          |                    |              |              |                          |
| Non-smoker                          | 61.9             | 55.0          | 56.6          | <0.001                   | 82.9               | 83.1         | 80.7         | 0.572                    |
| Daily consuming <20 cigarettes /day | 28.6             | 34.6          | 31.3          |                          | 16.0               | 15.7         | 17.6         |                          |
| Daily consuming ≥20 cigarettes /day | 9.5              | 10.4          | 12.1          |                          | 1.1                | 1.2          | 1.7          |                          |

1  
2  
3  
4  
5  
6  
7  
8  
9  
10  
11  
12  
13  
14  
15  
16  
17  
18  
19  
20  
21  
22  
23  
24  
25  
26  
27  
28  
29  
30  
31  
32  
33  
34  
35  
36  
37  
38  
39  
40  
41  
42  
43  
44  
45  
46  
47  
48  
49

|                                               |                     |                     |                     |        |                     |                     |                     |        |  |
|-----------------------------------------------|---------------------|---------------------|---------------------|--------|---------------------|---------------------|---------------------|--------|--|
| Alcohol (%)                                   |                     |                     |                     |        |                     |                     |                     |        |  |
| Non-drinker                                   | 30.2                | 26.7                | 26.7                | <0.001 | 53.4                | 52.2                | 49.8                | <0.001 |  |
| Drinker <1 go /day <sup>d</sup>               | 33.9                | 35.7                | 34.5                |        | 34.2                | 35.9                | 35.5                |        |  |
| Drinker 1 to <2 go /day <sup>d</sup>          | 24.6                | 26.3                | 26.8                |        | 9.5                 | 9.5                 | 11.5                |        |  |
| Drinker ≥2 go /day <sup>d</sup>               | 11.3                | 11.3                | 12.0                |        | 2.9                 | 2.4                 | 3.2                 |        |  |
| BMI (kg/m <sup>2</sup> ) <sup>b</sup>         | 22.4 ± 3.3          | 23.4 ± 3.3          | 24.6 ± 3.7          | <0.001 | 21.0 ± 3.5          | 21.8 ± 3.5          | 22.5 ± 3.8          | <0.001 |  |
| Waist circumference (cm) <sup>b</sup>         | 80.3 ± 9.2          | 82.9 ± 9.0          | 86.0 ± 9.8          | <0.001 | 75.5 ± 9.5          | 77.7 ± 9.4          | 79.6 ± 9.8          | <0.001 |  |
| Systolic blood pressure (mm Hg) <sup>b</sup>  | 123.5 ± 15.5        | 126.1 ± 15.5        | 126.7 ± 15.1        | <0.001 | 113.1 ± 16.3        | 117.3 ± 17.2        | 117.0 ± 17.2        | <0.001 |  |
| Diastolic blood pressure (mm Hg) <sup>b</sup> | 75.2 ± 11.4         | 77.3 ± 11.9         | 78.0 ± 12.0         | <0.001 | 69.1 ± 10.9         | 71.4 ± 11.5         | 71.5 ± 11.9         | <0.001 |  |
| Fasting plasma glucose (mg/dL) <sup>c</sup>   | 93.0 (92.5 to 93.6) | 94.4 (94.2 to 94.6) | 94.6 (94.3 to 94.8) | <0.001 | 88.1 (87.5 to 88.7) | 89.1 (88.9 to 89.3) | 89.5 (89.1 to 89.9) | <0.001 |  |

|                                   |                      |                        |                        |        |                     |                     |                     |        |
|-----------------------------------|----------------------|------------------------|------------------------|--------|---------------------|---------------------|---------------------|--------|
| Triglyceride (mg/dL) <sup>c</sup> | 98.3 (96.2 to 103.8) | 103.8 (103.0 to 110.8) | 110.8 (109.8 to 111.9) | <0.001 | 67.0 (65.3 to 68.7) | 71.6 (70.9 to 72.3) | 74.1 (72.9 to 75.2) | <0.001 |
| HDL-C (mg/dL) <sup>b</sup>        | 61.3 ± 15.3          | 59.4 ± 15.0            | 57.2 ± 14.3            | <0.001 | 71.4 ± 15.3         | 70.5 ± 15.8         | 69.3 ± 15.5         | <0.001 |

Cross to sectional survey of 56,865 examinees in All Japan Labor Welfare Foundation, Japan, 2011.

BMI=body mass index; HDL-C=high to density lipoprotein cholesterol.

<sup>a</sup> Linear regression and logistic regression, assigning ordinal number (0 to 2) to eating rate, as appropriate.

<sup>b</sup> Mean ± SD.

<sup>c</sup> Geometric means (95% confidence intervals).

<sup>d</sup> One *go* contains ~25g of ethanol.

Table 2. Odds ratios and 95% confidence intervals for metabolic syndrome according to eating rate (n = 56,865)

| Eating rate          | Men (n = 41,820)    |                     |                     | P for trend <sup>b</sup> | Women (n = 15,045)  |                     |                     | P for trend <sup>b</sup> |
|----------------------|---------------------|---------------------|---------------------|--------------------------|---------------------|---------------------|---------------------|--------------------------|
|                      | Slow                | Normal <sup>a</sup> | Fast                |                          | Slow                | Normal <sup>a</sup> | Fast                |                          |
| n (%)                | 2,821 (6.8)         | 24,893 (59.5)       | 14,106 (33.7)       |                          | 1,398 (9.3)         | 9,893 (65.8)        | 3,754 (24.9)        |                          |
| MetS, n              | 361                 | 4,180               | 3,193               |                          | 116                 | 1,261               | 547                 |                          |
| Model 1 <sup>c</sup> | 0.70 (0.62 to 0.79) | 1.00                | 1.62 (1.53 to 1.71) | <0.001                   | 0.75 (0.61 to 0.92) | 1.00                | 1.27 (1.13 to 1.42) | <0.001                   |
| Model 2 <sup>d</sup> | 0.70 (0.62 to 0.79) | 1.00                | 1.61 (1.53 to 1.70) | <0.001                   | 0.74 (0.60 to 0.91) | 1.00                | 1.27 (1.13 to 1.43) | <0.001                   |
| Model 3 <sup>e</sup> | 0.91 (0.80 to 1.04) | 1.00                | 1.10 (1.03 to 1.17) | <0.001                   | 0.88 (0.70 to 1.11) | 1.00                | 0.98 (0.86 to 1.12) | 0.714                    |

MetS=Metabolic syndrome.

1  
2  
3  
4  
5  
6  
7 MetS as defined using the criteria of the Joint Interim Statement : the presence of three or more of the following risk factors: 1) waist circumference  $\geq 90$  cm  
8  
9  
10 in men and  $\geq 80$  cm in women, 2) triglyceride level  $\geq 150$  mg/dL (1.7 mmol/L), 3) HDL-C level  $< 40$  mg/dL (1.04 mmol/L) in men and  $< 50$  mg/dL (1.3  
11  
12 mmol/L) in women, 4) blood pressure  $\geq 130$  mm Hg systolic or  $\geq 85$  mm Hg diastolic, 5) fasting glucose level  $\geq 100$  mg/dL (5.6 mmol/L).  
13  
14

15  
16 <sup>a</sup> Reference.

17  
18  
19 <sup>b</sup> Multiple logistic regression, assigning ordinal number (0 to 2) to eating rate.

20  
21  
22 <sup>c</sup> Adjusted for age.

23  
24  
25 <sup>d</sup> Adjusted for age, smoking status, alcohol and regular physical activity.

26  
27  
28 <sup>e</sup> Adjusted for age, smoking status, alcohol, regular physical activity and body mass index.  
29  
30  
31  
32  
33  
34  
35  
36  
37  
38  
39  
40  
41  
42  
43  
44  
45  
46  
47  
48  
49

1  
2  
3  
4  
5  
6  
7  
8  
9  
10  
11  
12  
13  
14  
15  
16  
17  
18  
19  
20  
21  
22  
23  
24  
25  
26  
27  
28  
29  
30  
31  
32  
33  
34  
35  
36  
37  
38  
39  
40  
41  
42  
43  
44  
45  
46  
47  
48  
49

Table3. Odds ratios and 95% confidence intervals for components of metabolic syndrome according to eating rate (n = 56,865)

| Eating rate                  | Men (n = 41,820)    |                     |                     | P for trend <sup>b</sup> | Women (n = 15,045)  |                     |                     | P for trend <sup>b</sup> |
|------------------------------|---------------------|---------------------|---------------------|--------------------------|---------------------|---------------------|---------------------|--------------------------|
|                              | Slow                | Normal <sup>a</sup> | Fast                |                          | Slow                | Normal <sup>a</sup> | Fast                |                          |
| n (%)                        | 2,821 (6.8)         | 24,893 (59.5)       | 14,106 (33.7)       |                          | 1,398 (9.3)         | 9,893 (65.8)        | 3,754 (24.9)        |                          |
| Central obesity <sup>c</sup> |                     |                     |                     |                          |                     |                     |                     |                          |
| Model 1 <sup>d</sup>         | 0.63 (0.56 to 0.71) | 1.00                | 1.98 (1.89 to 2.08) | <0.001                   | 0.73 (0.64 to 0.83) | 1.00                | 1.44 (1.34 to 1.56) | <0.001                   |
| Model 2 <sup>e</sup>         | 0.63 (0.56 to 0.70) | 1.00                | 1.97 (1.88 to 2.07) | <0.001                   | 0.73 (0.64 to 0.83) | 1.00                | 1.44 (1.33 to 1.56) | <0.001                   |

High blood pressure <sup>f</sup>

|                      |                     |                     |        |                     |                     |        |
|----------------------|---------------------|---------------------|--------|---------------------|---------------------|--------|
| Model 1 <sup>d</sup> | 0.75 (0.69 to 1.00) | 1.22 (1.17 to 1.27) | <0.001 | 0.76 (0.66 to 1.00) | 1.10 (1.01 to 1.21) | <0.001 |
| Model 2 <sup>e</sup> | 0.74 (0.68 to 1.00) | 1.20 (1.15 to 1.26) | <0.001 | 0.76 (0.65 to 1.00) | 1.10 (1.00 to 1.20) | <0.001 |
| Model 3 <sup>g</sup> | 0.88 (0.81 to 1.00) | 0.97 (0.93 to 1.02) | 0.645  | 0.85 (0.72 to 1.00) | 0.93 (0.84 to 1.02) | 0.923  |

High fasting plasma glucose <sup>h</sup>

|                      |                     |                     |        |                     |                     |       |
|----------------------|---------------------|---------------------|--------|---------------------|---------------------|-------|
| Model 1 <sup>d</sup> | 0.78 (0.71 to 1.00) | 1.17 (1.12 to 1.23) | <0.001 | 1.03 (0.85 to 1.00) | 1.17 (1.04 to 1.31) | 0.035 |
| Model 2 <sup>e</sup> | 0.78 (0.71 to 1.00) | 1.16 (1.11 to 1.21) | <0.001 | 1.03 (0.85 to 1.00) | 1.16 (1.03 to 1.29) | 0.042 |



1  
2  
3  
4  
5  
6  
7  
8  
9  
10  
11  
12  
13  
14  
15  
16  
17  
18  
19  
20  
21  
22  
23  
24  
25  
26  
27  
28  
29  
30  
31  
32  
33  
34  
35  
36  
37  
38  
39  
40  
41  
42  
43  
44  
45  
46  
47  
48  
49

|                                |               |  |               |       |               |      |               |
|--------------------------------|---------------|--|---------------|-------|---------------|------|---------------|
|                                | 0.87)         |  | 1.22)         | 1     | 1.25)         |      | 1.31)         |
| Model 3 <sup>g</sup>           | 0.88 (0.80 to |  | 0.99 (0.94 to | 0.238 | 1.14 (0.94 to |      | 1.02 (0.90 to |
|                                | 1.00          |  | 1.05)         |       | 1.40)         | 1.00 | 0.536         |
|                                | 0.98)         |  | 1.05)         |       | 1.40)         |      | 1.15)         |
| High triglyceride <sup>i</sup> |               |  |               |       |               |      |               |
| Model 1 <sup>d</sup>           | 0.88 (0.80 to |  | 1.32 (1.26 to | <0.00 | 0.83 (0.67 to |      | 1.14 (1.01 to |
|                                | 1.00          |  | 1.38)         | 1     | 1.01)         | 1.00 | 0.002         |
|                                | 0.96)         |  | 1.38)         | 1     | 1.01)         |      | 1.28)         |
| Model 2 <sup>e</sup>           | 0.90 (0.82 to |  | 1.33 (1.27 to | <0.00 | 0.81 (0.66 to |      | 1.13 (1.01 to |
|                                | 1.00          |  | 1.39)         | 1     | 1.00)         | 1.00 | 0.002         |
|                                | 0.98)         |  | 1.39)         | 1     | 1.00)         |      | 1.27)         |
| Model 3 <sup>g</sup>           | 1.08 (0.98 to |  | 1.07 (1.02 to | 0.121 | 0.90 (0.73 to |      | 0.98 (0.87 to |
|                                | 1.00          |  | 1.12)         |       | 1.11)         | 1.00 | 0.753         |
|                                | 1.19)         |  | 1.12)         |       | 1.11)         |      | 1.11)         |

Low HDL-C<sup>j</sup>

|                      |                     |                     |        |                     |                     |       |
|----------------------|---------------------|---------------------|--------|---------------------|---------------------|-------|
| Model 1 <sup>d</sup> | 0.83 (0.73 to 1.00) | 1.34 (1.26 to 1.43) | <0.001 | 0.90 (0.74 to 1.00) | 1.11 (0.99 to 1.25) | 0.018 |
| Model 2 <sup>e</sup> | 0.83 (0.73 to 1.00) | 1.36 (1.28 to 1.45) | <0.001 | 0.89 (0.74 to 1.00) | 1.12 (1.00 to 1.26) | 0.011 |
| Model 3 <sup>g</sup> | 0.97 (0.84 to 1.00) | 1.10 (1.03 to 1.18) | 0.004  | 1.00 (0.82 to 1.22) | 0.96 (0.85 to 1.08) | 0.500 |

BMI=body mass index; HDL-C=high to density lipoprotein cholesterol.

<sup>a</sup> Reference.

<sup>b</sup> Multiple logistic regression, assigning ordinal number (0 to 2) to eating rate.

<sup>c</sup> Waist circumference  $\geq 90$  cm in men and  $\geq 80$  cm in women.

<sup>d</sup> Adjusted for age.

<sup>e</sup> Adjusted for age, smoking status, alcohol and regular physical activity.

1  
2  
3  
4  
5  
6  
7 <sup>f</sup> Blood pressure  $\geq 130$  mm Hg for systolic or  $\geq 85$  mm Hg for diastolic.  
8

9  
10 <sup>g</sup> Adjusted for age, smoking status, alcohol, regular physical activity and body mass index.  
11

12  
13 <sup>h</sup> Fasting plasma glucose  $\geq 100$  mg/dL or under medication.  
14

15  
16 <sup>i</sup> Triglyceride  $\geq 150$  mg/dL or under medication.  
17

18  
19 <sup>j</sup> HDL-C  $< 40$  mg/dL in men,  $< 50$  mg/dL in women or under medication.  
20  
21  
22  
23  
24  
25  
26  
27  
28  
29  
30  
31  
32  
33  
34  
35  
36  
37  
38  
39  
40  
41  
42  
43  
44  
45  
46  
47  
48  
49

## Acknowledgments

The authors would like to thank Dr. Nobuo Yanagisawa and Dr. Takeshi Kawaguchi for their coordinating the study.

Contributors: SN and KKurotani designed study and drafted the manuscript. SN, NMP, AN, KKuwahara performed the data analysis. MD collected and interpreted the data. All authors have participated in the interpretation of the findings, revised it critically for important intellectual content and approved final version to be published. TM and YN provided administrative, technical and material support. SN and TM are guarantors.

Funding: This study was supported by the Industrial Health Foundation.

Competing interests: All authors have completed the ICMJE uniform disclosure form at [www.icmje.org/coi\\_disclosure.pdf](http://www.icmje.org/coi_disclosure.pdf) and declare: all authors declare no interests.

Ethical approval: The research protocol was approved by the Ethics Committee of the National Center for Global Health and Medicine and the Ethics Committee of Toho University.

Data sharing: No additional data available.

Transparency: SN affirms that the manuscript is an honest, accurate, and transparent account of the study being reported; that no important aspects of the study have been omitted; and that any discrepancies from the study as planned (and, if relevant,

1  
2  
3  
4  
5  
6  
7  
8  
9  
10  
11  
12  
13  
14  
15  
16  
17  
18  
19  
20  
21  
22  
23  
24  
25  
26  
27  
28  
29  
30  
31  
32  
33  
34  
35  
36  
37  
38  
39  
40  
41  
42  
43  
44  
45  
46  
47  
48  
49  
50  
51  
52  
53  
54  
55  
56  
57  
58  
59  
60

registered) have been explained.

For peer review only

## References

1. Eckel RH, Alberti KG, Grundy SM, et al. The metabolic syndrome. *Lancet* 2010;**375**:181-83.
2. Gomez-Martinez S, Martinez-Gomez D, Perez de Heredia F, et al. Eating habits and total and abdominal fat in Spanish adolescents: influence of physical activity. The AVENA study. *J Adolesc Health* 2012;**50**:403-09.
3. Ilanne-Parikka P, Eriksson JG, Lindstrom J, et al. Effect of lifestyle intervention on the occurrence of metabolic syndrome and its components in the Finnish Diabetes Prevention Study. *Diabetes care* 2008;**31**:805-07.
4. Nanri A, Tomita K, Matsushita Y, et al. Effect of six months lifestyle intervention in Japanese men with metabolic syndrome: randomized controlled trial. *J Occup Health* 2012;**54**:215-22.
5. Ferster CB, Nurnberger JI, Levitt EB. The control of eating. 1962. *Obes Res* 1996;**4**:401-10.
6. Hill SW, McCutcheon NB. Eating responses of obese and nonobese humans during dinner meals. *Psychosom Med* 1975;**37**:395-401.
7. Bellack AS. Behavior therapy for weight reduction. *Addict Behav* 1975;**1**:73-82.
8. Otsuka R, Tamakoshi K, Yatsuya H, et al. Eating fast leads to obesity: findings based

1  
2  
3  
4  
5  
6 on self-administered questionnaires among middle-aged Japanese men and women. *J*  
7  
8  
9 *Epidemiol* 2006;**16**:117-24.

10  
11 9. Sasaki S, Katagiri A, Tsuji T, et al. Self-reported rate of eating correlates with body  
12  
13 mass index in 18-y-old Japanese women. *Int J Obes Relat Metab Disord*  
14  
15 2003;**27**:1405-10.  
16  
17

18  
19 10. Maruyama K, Sato S, Ohira T, et al. The joint impact on being overweight of self  
20  
21 reported behaviours of eating quickly and eating until full: cross sectional survey. *BMJ*  
22  
23 2008;**337**:a2002.  
24  
25  
26

27  
28 11. Lee KS, Kim DH, Jang JS, et al. Eating rate is associated with cardiometabolic risk  
29  
30 factors in Korean adults. *Nut Metab Cardiovasc Dis* 2013;**23**:635-41.  
31  
32

33  
34 12. Otsuka R, Tamakoshi K, Yatsuya H, et al. Eating fast leads to insulin resistance:  
35  
36 findings in middle-aged Japanese men and women. *Prev Med* 2008;**46**:154-59.  
37  
38

39  
40 13. Radzeviciene L, Ostrauskas R. Fast eating and the risk of type 2 diabetes mellitus: a  
41  
42 case-control study. *Clin Nutr* 2013;**32**:232-35.  
43  
44

45  
46 14. Ohkuma T, Fujii H, Iwase M, et al. Impact of eating rate on obesity and  
47  
48 cardiovascular risk factors according to glucose tolerance status: the Fukuoka Diabetes  
49  
50 Registry and the Hisayama Study. *Diabetologia* 2013;**56**:70-77.  
51  
52

53  
54 15. Shigeta H, Shigeta M, Nakazawa A, et al. Lifestyle, obesity, and insulin resistance.  
55  
56  
57  
58  
59  
60

1  
2  
3  
4  
5  
6  
7  
8  
9  
10  
11  
12  
13  
14  
15  
16  
17  
18  
19  
20  
21  
22  
23  
24  
25  
26  
27  
28  
29  
30  
31  
32  
33  
34  
35  
36  
37  
38  
39  
40  
41  
42  
43  
44  
45  
46  
47  
48  
49  
50  
51  
52  
53  
54  
55  
56  
57  
58  
59  
60

*Diabetes care* 2001;**24**:608.

16. Gerace TA, George VA. Predictors of weight increases over 7 years in fire fighters and paramedics. *Prev Med* 1996;**25**:593-600.

17. Tanihara S, Imatoh T, Miyazaki M, et al. Retrospective longitudinal study on the relationship between 8-year weight change and current eating speed. *Appetite* 2011;**57**:179-83.

18. Sakurai M, Nakamura K, Miura K, et al. Self-reported speed of eating and 7-year risk of type 2 diabetes mellitus in middle-aged Japanese men. *Metabolism* 2012;**61**:1566-71.

19. Kral JG, Buckley MC, Kissileff HR, et al. Metabolic correlates of eating behavior in severe obesity. *Int J Obes Relat Metab Disord* 2001;**25**:258-64.

20. Shin A, Lim SY, Sung J, et al. Dietary intake, eating habits, and metabolic syndrome in Korean men. *J Am Diet Assoc* 2009;**109**:633-40.

21. Shen W, Punyanitya M, Chen J, et al. Waist circumference correlates with metabolic syndrome indicators better than percentage fat. *Obesity (Silver Spring)* 2006;**14**:727-36.

22. Alberti KG, Eckel RH, Grundy SM, et al. Harmonizing the metabolic syndrome: a joint interim statement of the International Diabetes Federation Task Force on Epidemiology and Prevention; National Heart, Lung, and Blood Institute; American



1  
2  
3  
4  
5  
6 Heart Association; World Heart Federation; International Atherosclerosis Society; and  
7  
8  
9 International Association for the Study of Obesity. *Circulation* 2009;**120**:1640-5.

10  
11  
12 23. Ministry of Justice, Japan. Industrial Safety and Health Act, Article 66 (Medical  
13  
14 Examination). Available at:

15  
16  
17 <http://www.japaneselawtranslation.go.jp/law/detail/?id=1926&vm=&re=>. Accessed 28  
18  
19  
20 July 2014.

21  
22  
23 24. Ministry of Health, Labour and Welfare. Specific Health Checkups and Specific  
24  
25 Health Guidance. Secondary Specific Health Checkups and Specific Health Guidance.

26  
27 Available at: <http://www.mhlw.go.jp/english/wp/wp-hw3/dl/2-007.pdf>. Accessed 28

28  
29  
30 July 2014.25. The Ministry of Health, Labour and Welfare, Ministry of Education,

31  
32  
33 Culture, Sports, Science and Technology. Ethical guidelines for epidemiological

34  
35  
36 research. 2002. Available at: <http://www.niph.go.jp/wadai/ekigakurinri/guidelines.pdf>.

37  
38  
39 Accessed 28 July, 2014.

40  
41  
42  
43 26. Ministry of Health, Labour and Welfare. Questionnaire of Specific Health Checkups.

44  
45  
46  
47 Secondary Questionnaire of Specific Health Checkups. Available at:

48  
49  
50 [http://www.mhlw.go.jp/seisakunitsuite/bunya/kenkou\\_iryuu/kenkou/seikatsu/dl/hoken-p](http://www.mhlw.go.jp/seisakunitsuite/bunya/kenkou_iryuu/kenkou/seikatsu/dl/hoken-p)  
51  
52 rogram2\_02.pdf. Accessed 28 July 2014. (in Japanese)

53  
54  
55 27. Hill SW, McCutcheon NB. Contributions of obesity, gender, hunger, food preference,

1  
2  
3  
4  
5  
6 and body size to bite size, bite speed, and rate of eating. *Appetite* 1984;**5**:73-83.  
7

8  
9 28. Ekuni D, Furuta M, Takeuchi N, et al. Self-reports of eating quickly are related to a  
10  
11 decreased number of chews until first swallow, total number of chews, and total  
12  
13 duration of chewing in young people. *Arch Oral Biol* 2012;**57**:981-86.  
14  
15

16  
17 29. Rolls ET. Sensory processing in the brain related to the control of food intake. *Proc*  
18  
19 *Nutr Soc* 2007;**66**:96-112.  
20  
21

22  
23 30. Morton GJ, Cummings DE, Baskin DG, et al. Central nervous system control of  
24  
25 food intake and body weight. *Nature* 2006;**443**:289-95.  
26  
27

28  
29 31. de Graaf C, Blom WA, Smeets PA, et al. Biomarkers of satiation and satiety. *Am J*  
30  
31 *Clin Nutr* 2004;**79**:946-61.  
32  
33

34  
35 32. Kokkinos A, le Roux CW, Alexiadou K, et al. Eating slowly increases the  
36  
37 postprandial response of the anorexigenic gut hormones, peptide YY and glucagon-like  
38  
39 peptide-1. *J Clin Endocrinol Metab* 2010;**95**:333-37.  
40  
41

42  
43 33. Sobki SH, Zaid AA, Khan HA, et al. Significant impact of pace of eating on serum  
44  
45 ghrelin and glucose levels. *Clin Biochem* 2010;**43**:522-24.  
46  
47

48  
49 34. Viskaal-van Dongen M, Kok FJ, de Graaf C. Eating rate of commonly consumed  
50  
51 foods promotes food and energy intake. *Appetite* 2011;**56**:25-31.  
52  
53

54  
55 35. Scisco JL, Muth ER, Dong Y, et al. Slowing bite-rate reduces energy intake: an  
56  
57

1  
2  
3  
4  
5  
6 application of the bite counter device. *J Am Diet Assoc* 2011;**111**:1231-35.

7  
8  
9 36. Mochizuki K, Misaki Y, Miyauchi R, et al. A higher rate of eating is associated with  
10  
11 higher circulating interleukin-1beta concentrations in Japanese men not being treated for  
12  
13 metabolic diseases. *Nutrition* 2012;**28**:978-83.

14  
15  
16  
17 37. Besedovsky H, del Rey A, Sorkin E, et al. Immunoregulatory feedback between  
18  
19 interleukin-1 and glucocorticoid hormones. *Science* 1986;**233**:652-54

20  
21  
22  
23 38. Matsuki T, Horai R, Sudo K, et al. IL-1 plays an important role in lipid metabolism  
24  
25 by regulating insulin levels under physiological conditions. *J Exp Med*  
26  
27  
28  
29 2003;**198**:877-88.

30  
31  
32 39. Yatabe MS, Yatabe J, Yoneda M, et al. Salt sensitivity is associated with insulin  
33  
34 resistance, sympathetic overactivity, and decreased suppression of circulating renin  
35  
36 activity in lean patients with essential hypertension. *Am J Clin Nutr* 2010;**92**:77-82.

37  
38  
39 40. Facchini FS, DoNascimento C, Reaven GM, et al. Blood pressure, sodium intake,  
40  
41 insulin resistance, and urinary nitrate excretion. *Hypertension* 1999;**33**:1008-12.

42  
43  
44 41. Pollare T, Lithell H, Berne C. Insulin resistance is a characteristic feature of primary  
45  
46 hypertension independent of obesity. *Metabolism*. 1990;**39**:167-74.

47  
48  
49 42. De Vogli R, Kouvonen A, Gimeno D. The influence of market deregulation on fast  
50  
51 food consumption and body mass index: a cross national time series analysis. *Bull*  
52  
53  
54  
55  
56  
57  
58  
59  
60

1  
2  
3  
4  
5  
6 *World Health Organ* 2014;**92**:99-107A.  
7

8  
9 43. Ministry of Health, Labour and Welfare. Special Survey on Industrial Safety and  
10  
11 Health. Available at: <http://www.mhlw.go.jp/bunya/roudoukijun/anzeneisei11/h23.html>.  
12  
13

14  
15 Accessed 28 July 2014. (in Japanese)  
16  
17  
18  
19  
20  
21  
22  
23  
24  
25  
26  
27  
28  
29  
30  
31  
32  
33  
34  
35  
36  
37  
38  
39  
40  
41  
42  
43  
44  
45  
46  
47  
48  
49  
50  
51  
52  
53  
54  
55  
56  
57  
58  
59  
60

Or peer review only

STROBE Statement—Checklist of items that should be included in reports of *cross-sectional studies*

MS ID#: bmjopen-2014-005241.R1

MS TITLE: Self-reported eating rate and metabolic syndrome in Japanese: cross-sectional study

|                              | Item No | Recommendation                                                                                                                                                                       | Location in manuscript                                                                                             |
|------------------------------|---------|--------------------------------------------------------------------------------------------------------------------------------------------------------------------------------------|--------------------------------------------------------------------------------------------------------------------|
| <b>Title and abstract</b>    | 1       | (a) Indicate the study’s design with a commonly used term in the title or the abstract                                                                                               | Line 1 on page 1 and line 23 on page 3                                                                             |
|                              |         | (b) Provide in the abstract an informative and balanced summary of what was done and what was found                                                                                  | What was done: line 21-22 on page 3<br>What was found: line 42-44 on page 4                                        |
| <b>Introduction</b>          |         |                                                                                                                                                                                      |                                                                                                                    |
| Background/rationale         | 2       | Explain the scientific background and rationale for the investigation being reported                                                                                                 | Scientific background: line 51-67 on page 6<br>Rationale: Line 67-74 on page 6 and 7                               |
| Objectives                   | 3       | State specific objectives, including any prespecified hypotheses                                                                                                                     | Line 73-79 on page 7                                                                                               |
| <b>Methods</b>               |         |                                                                                                                                                                                      |                                                                                                                    |
| Study design                 | 4       | Present key elements of study design early in the paper                                                                                                                              | Line 75 on page 7                                                                                                  |
| Setting                      | 5       | Describe the setting, locations, and relevant dates, including periods of recruitment, exposure, follow-up, and data collection                                                      | Line 83-89 on page 7-8                                                                                             |
| Participants                 | 6       | (a) Give the eligibility criteria, and the sources and methods of selection of participants                                                                                          | Line 89-103 on page 8                                                                                              |
| Variables                    | 7       | Clearly define all outcomes, exposures, predictors, potential confounders, and effect modifiers. Give diagnostic criteria, if applicable                                             | Outcome: line 131-138 on page 10<br>Exposure: line 115 on page 9<br>Potential confounders: line 149-155 on page 11 |
| Data sources/<br>measurement | 8*      | For each variable of interest, give sources of data and details of methods of assessment (measurement). Describe comparability of assessment methods if there is more than one group | Line 116-129 on page 9 and 10                                                                                      |
| Bias                         | 9       | Describe any efforts to address potential sources of bias                                                                                                                            | Exclusion: line 89-103 on page 8<br>Adjustment: line 149-155 on page 11                                            |
| Study size                   | 10      | Explain how the study size was arrived at                                                                                                                                            | Not provided                                                                                                       |
| Quantitative<br>variables    | 11      | Explain how quantitative variables were handled in the analyses. If applicable, describe which groupings were chosen and why                                                         | Adjustment: line 149-155 on page 11                                                                                |

|                     |     |                                                                                                                                                                                                              |                                                                                                                   |
|---------------------|-----|--------------------------------------------------------------------------------------------------------------------------------------------------------------------------------------------------------------|-------------------------------------------------------------------------------------------------------------------|
| Statistical methods | 12  | (a) Describe all statistical methods, including those used to control for confounding                                                                                                                        | Line 140-157 on page 11                                                                                           |
|                     |     | (b) Describe any methods used to examine subgroups and interactions                                                                                                                                          | Line 155-157 on page 11                                                                                           |
|                     |     | (c) Explain how missing data were addressed                                                                                                                                                                  | We excluded participants who had missing information on potential confounding variables (line 100-102 on page 8). |
|                     |     | (d) If applicable, describe analytical methods taking account of sampling strategy                                                                                                                           | N/A                                                                                                               |
|                     |     | (e) Describe any sensitivity analyses                                                                                                                                                                        | N/A                                                                                                               |
| <b>Results</b>      |     |                                                                                                                                                                                                              |                                                                                                                   |
| Participants        | 13* | (a) Report numbers of individuals at each stage of study—eg numbers potentially eligible, examined for eligibility, confirmed eligible, included in the study, completing follow-up, and analysed            | Table 1                                                                                                           |
|                     |     | (b) Give reasons for non-participation at each stage                                                                                                                                                         | N/A                                                                                                               |
|                     |     | (c) Consider use of a flow diagram                                                                                                                                                                           | N/A                                                                                                               |
| Descriptive data    | 14* | (a) Give characteristics of study participants (eg demographic, clinical, social) and information on exposures and potential confounders                                                                     | Table 1<br>Line 63-168 on page 12                                                                                 |
|                     |     | (b) Indicate number of participants with missing data for each variable of interest                                                                                                                          | N/A                                                                                                               |
| Outcome data        | 15* | Report numbers of outcome events or summary measures                                                                                                                                                         | Table 2<br>Line 163 on page 12                                                                                    |
| Main results        | 16  | (a) Give unadjusted estimates and, if applicable, confounder-adjusted estimates and their precision (eg, 95% confidence interval). Make clear which confounders were adjusted for and why they were included | Table 2, Table3<br>Line 169-189 on page 12-13                                                                     |
|                     |     | (b) Report category boundaries when continuous variables were categorized                                                                                                                                    | Table2, Table3                                                                                                    |
|                     |     | (c) If relevant, consider translating estimates of relative risk into absolute risk for a meaningful time period                                                                                             | N/A                                                                                                               |
| Other analyses      | 17  | Report other analyses done—eg analyses of subgroups and interactions, and sensitivity analyses                                                                                                               | Line 155-156 on page 11                                                                                           |
| <b>Discussion</b>   |     |                                                                                                                                                                                                              |                                                                                                                   |
| Key results         | 18  | Summarise key results with reference to study objectives                                                                                                                                                     | Line 192-199 on page 13 and 14                                                                                    |
| Limitations         | 19  | Discuss limitations of the study, taking into account sources of potential bias                                                                                                                              | Line 245-263 on page 16 and 17                                                                                    |

1  
2  
3  
4  
5  
6  
7  
8  
9  
10  
11  
12  
13  
14  
15  
16  
17  
18  
19  
20  
21  
22  
23  
24  
25  
26  
27  
28  
29  
30  
31  
32  
33  
34  
35  
36  
37  
38  
39  
40  
41  
42  
43  
44  
45  
46  
47  
48  
49

or imprecision. Discuss both direction and magnitude of any potential bias

---

|                |    |                                                                                                                                                                            |                         |
|----------------|----|----------------------------------------------------------------------------------------------------------------------------------------------------------------------------|-------------------------|
| Interpretation | 20 | Give a cautious overall interpretation of results considering objectives, limitations, multiplicity of analyses, results from similar studies, and other relevant evidence | Line 200-210 on page 14 |
|----------------|----|----------------------------------------------------------------------------------------------------------------------------------------------------------------------------|-------------------------|

---

|                  |    |                                                                       |                         |
|------------------|----|-----------------------------------------------------------------------|-------------------------|
| Generalisability | 21 | Discuss the generalisability (external validity) of the study results | Line 254-258 on page 17 |
|------------------|----|-----------------------------------------------------------------------|-------------------------|

---

**Other information**

---

|         |    |                                                                                                                                                               |                                                                                           |
|---------|----|---------------------------------------------------------------------------------------------------------------------------------------------------------------|-------------------------------------------------------------------------------------------|
| Funding | 22 | Give the source of funding and the role of the funders for the present study and, if applicable, for the original study on which the present article is based | This study was supported by the Industrial Health Foundation for drafting the manuscript. |
|---------|----|---------------------------------------------------------------------------------------------------------------------------------------------------------------|-------------------------------------------------------------------------------------------|

---

N/A: Not applicable.

\*Give information separately for exposed and unexposed groups.

**Note:** An Explanation and Elaboration article discusses each checklist item and gives methodological background and published examples of transparent reporting. The STROBE checklist is best used in conjunction with this article (freely available on the Web sites of PLoS Medicine at <http://www.plosmedicine.org/>, Annals of Internal Medicine at <http://www.annals.org/>, and Epidemiology at <http://www.epidem.com/>). Information on the STROBE Initiative is available at [www.strobe-statement.org](http://www.strobe-statement.org).
